# Supplementary material
Source: publisher figshare collection journal article supplement (https://acs.figshare.com/ndownloader/files/5196271)
Supplement: Supplementary file 1 [file 5196271]

## **SUPPORTING INFORMATION**

|                                   |     |
|-----------------------------------|-----|
| Experimental part                 | p1  |
| Ortep representation of <b>35</b> | p10 |
| NMR spectra                       | p11 |
| Cartesian Coordinates             | p67 |

### **Experimental part**

All reactions were performed under nitrogen atmosphere with oven (80°C) or flame-dried glassware. All solvents were distilled prior to use; diethyl ether and tetrahydrofuran were dried by distilling over sodium benzophenone ketyl. Toluene, acetonitrile, dichloromethane and dimethylformamide were distilled over calcium hydride. Cesium carbonate and sodium iodide were flame-dried under reduced pressure before use. Materials were detected by visualization under ultraviolet lamp and/or by spraying with a solution of phosphomolybdic acid (10% in ethanol) or an aqueous solution of KMnO<sub>4</sub> (1% w/w) followed by heating on a hot plate. For the NMR spectra assignments, the following abbreviations were used: s, singlet; d, doublet; t, triplet; q, quartet; m, multiplet and br, broad. Chemical shifts are reported in  $\delta$  values relative to the solvent used (CHCl<sub>3</sub>: 7.26 ppm for <sup>1</sup>H NMR and 77.0 ppm for <sup>13</sup>C NMR) as internal standard. Where necessary COSY, NOESY and J-resolved correlation experiment were performed.

#### **Alcohol 5.**

To a solution of but-3-yn-1-ol (1 mL, 13.2 mmol) in CH<sub>2</sub>Cl<sub>2</sub> (60 mL) at 0°C, was added *p*-toluenesulfonic acid (29.3 mg, 0.15 mmol) followed by 3,4-dihydro-2H-pyran (1.55 mL, 17 mmol). The solution was stirred overnight at room temperature. NaHCO<sub>3</sub> (32 mg) and sat. NaHCO<sub>3</sub> (25 mL) were introduced and the mixture was stirred for 15 min, followed by extraction with CH<sub>2</sub>Cl<sub>2</sub> (3 x 60 mL). The organic layer was dried over MgSO<sub>4</sub>, the solvent was evaporated *in vacuo*, and the residue was chromatographed on silica gel with 5% EtOAc in hexane to give **5** as an oil (1.75 g, 86%).

<sup>1</sup>H NMR (300 MHz, CDCl<sub>3</sub>,  $\delta$  ppm): 4.65 (1H, t, J=3.5Hz, OCH<sub>2</sub>O); 3.92-3.80 (2H, m, CH<sub>2</sub>CH<sub>2</sub>O); 3.60-3.45 (2H, m, CH<sub>2</sub>CH<sub>2</sub>O); 2.50 (2H, td, J=7Hz, 3Hz, OCH<sub>2</sub>CH<sub>2</sub>); 1.95 (1H, t, J=2.5Hz, HC C); 1.85-1.50 (6H, m, CH<sub>2</sub> THP). <sup>13</sup>C NMR (75 MHz, CDCl<sub>3</sub>,  $\delta$  ppm): 98.57, 81.27, 69.17, 65.38, 61.99, 30.41, 25.32, 19.82, 19.26. IR (film,  $\nu$  cm<sup>-1</sup>): 3294, 2943, 2873, 2359, 2120, 1441, 1201. MS (MH)<sup>+</sup>: 153. HRMS calcd: 153.0915 (MH)<sup>+</sup>; found: 153.0918.

#### **Chlorohydrine 6**

A solution of allyl chloride (3 mL, 36.8 mmol) in CH<sub>2</sub>Cl<sub>2</sub> (20 mL) at -78°C was treated with ozone. The mixture was quenched with dimethyl-sulfide (37 mL) at -78°C and was warmed to room temperature over 2 h. The chloroacetaldehyde was purified by distillation (bp.  $\approx$  80°C).

To a solution of alkynol **5** (1.55 g, 10.09 mmol) in THF (25 mL) at -40°C, was added *n*-BuLi (8.53 mL, 11.09 mmol). After 10 min, the mixture was cooled to -60°C. Chloroacetaldehyde (1.11 g, 14.25 mmol) was added dropwise via a cannula at -60°C, and the mixture was warmed to room temperature and stirred for 2h. Sat. NH<sub>4</sub>Cl (25 mL) was then added and the compound was extracted with Et<sub>2</sub>O (3 x 25 mL). The organic layer was dried

over  $\text{MgSO}_4$  and the residue was chromatographed on silica gel with 20% EtOAc in hexane to give **6** as an oil (1.4 g, 60%).

$^1\text{H}$  NMR (300 MHz,  $\text{CDCl}_3$ ,  $\delta$  ppm): 4.60 (1H, m,  $\text{OCHO}$ ) ; 4.50-4.45 (1H, m,  $\text{OCHC}$  C) ; 3.85-3.75 (2H, m,  $\text{CH}_2\text{O}$ ) ; 3.65-3.45 (4H, m,  $\text{CH}_2\text{Cl}$ ,  $\text{CH}_2\text{O}$ ) ; 3.30 (1H, d,  $J=5.5\text{Hz}$ ,  $\text{OH}$ ) ; 2.50 (2H, td,  $J=7\text{Hz}$ , 2Hz, C C $\text{CH}_2$ ) ; 1.80-1.45 (6H, m,  $\text{CH}_2$  THP).  $^{13}\text{C}$  NMR (75 MHz,  $\text{CDCl}_3$ ,  $\delta$  ppm): 98.68, 83.83, 78.72, 65.68, 62.42, 62.15, 48.98, 30.40, 25.28, 20.09, 19.23. IR (film,  $\nu$   $\text{cm}^{-1}$ ): 3383, 2944, 2661, 2231, 1201. MS (M-H) $^+$ : 231. HRMS calcd: 231.0788 (M-H) $^+$ ; found: 231.0792.

### Alcohol 7

To a solution of chlorohydrin **6** (0.64 g, 2.77 mmol) in THF (28 mL) at  $0^\circ\text{C}$ , 2,6-lutidine (0.42 mL, 3.6 mmol) and triisopropylsilane triflate (0.9 mL, 3.33 mmol) were added. The mixture was stirred for 45 min at  $0^\circ\text{C}$ , quenched with sat.  $\text{NH}_4\text{Cl}$  (25 mL) then extracted with  $\text{Et}_2\text{O}$  (3 x 25 mL). The organic layer was dried over  $\text{MgSO}_4$  and the residue was chromatographed on silica gel with 20%  $\text{Et}_2\text{O}$  in hexanes to give **7** (1.05 g, 98%) as an oil.

$^1\text{H}$  NMR (300 MHz,  $\text{CDCl}_3$ ,  $\delta$  ppm): 4.65-4.55 (2H, m,  $\text{OCHO}$  et  $\text{OCHC}$  C) ; 3.90-3.75 (2H, m,  $\text{CH}_2\text{O}$ ) ; 3.65-3.45 (4H, m,  $\text{CH}_2\text{Cl}$ ,  $\text{CH}_2\text{O}$ ) ; 2.50 (2H, td,  $J=7\text{Hz}$ , 2Hz, C C $\text{CH}_2$ ) ; 1.85-1.50 (6H, m,  $\text{CH}_2$  THP) ; 1.30-1.10 (21H, m, TIPS).  $^{13}\text{C}$  NMR (75 MHz,  $\text{CDCl}_3$ ,  $\delta$  ppm): 98.26, 83.03, 79.63, 65.13, 63.82, 61.50, 48.66, 30.33, 25.35, 19.96, 19.06, 17.74, 12.17, 12.13, 12.08. IR (film,  $\nu$   $\text{cm}^{-1}$ ): 2944, 2867, 2363, 2229, 1464, 1201. MS (M -  $\text{C}_3\text{H}_7$ ) $^+$ : 345. HRMS calcd: 345.1653 (M -  $\text{C}_3\text{H}_7$ ) $^+$ ; found: 345.1657.

### Alkene 8

To a solution of alkyne **7** (1.5 g, 3.87 mmol) in  $\text{Et}_2\text{O}$  (40 mL), Lindlar catalyst (250 mg) was added under  $\text{H}_2$ . The mixture was stirred for 4 h at room temperature and filtered through Celite with  $\text{Et}_2\text{O}$ . The organic layer was dried over  $\text{MgSO}_4$  and evaporated *in vacuo* to give the alkene **8** (1.48 g, 98%) as an oil.

$^1\text{H}$  NMR (300 MHz,  $\text{CDCl}_3$ ,  $\delta$  ppm): 5.60-5.40 (2H, m,  $\text{HC}=\text{CH}$ ) ; 4.70 (1H, td,  $J=6.5\text{Hz}$ , 6Hz,  $\text{CHOTIPS}$ ) ; 4.60-4.55 (1H, m,  $\text{OCHO}$ ) ; 3.90-3.70 (2H, m,  $\text{CH}_2\text{O}$ ) ; 3.55-3.35 (4H, m,  $\text{CH}_2\text{Cl}$ ,  $\text{CH}_2\text{O}$ ) ; 2.45-2.35 (2H, m,  $\text{CH}_2\text{-CH=}$ ) ; 1.85-1.50 (6H, m,  $\text{CH}_2$  THP) ; 1.12-0.91 (21H, m, TIPS).  $^{13}\text{C}$  NMR (75 MHz,  $\text{CDCl}_3$ ,  $\delta$  ppm): 132.30, 128.45, 98.88, 69.24, 66.52, 62.23, 48.97, 30.58, 28.94, 25.41, 19.52, 17.94, 12.20. IR (film,  $\nu$   $\text{cm}^{-1}$ ): 2944, 2867, 1654, 1464. MS (M -  $\text{C}_3\text{H}_7$ ) $^+$ : 347.

HRMS calcd: 347.1809 (M -  $\text{C}_3\text{H}_7$ ) $^+$ ; found: 347.1818.

### Alcohol 9

To a solution of alcohol **8** (1.5 g, 3.84 mmol) in MeOH (39 mL) was added *p*-Toluenesulfonic acid (73 mg, 0.38 mmol). The solution was stirred for 1 h at room temperature and was quenched with sat.  $\text{NaHCO}_3$  (30 mL). The mixture was extracted with  $\text{Et}_2\text{O}$  (3 x 30 mL). The organic layer was dried over  $\text{MgSO}_4$ , the solvent was evaporated *in vacuo*, and the residue was chromatographed on silica gel with 30% EtOAc in hexanes to give **9** (0.88 g, 75%).

$^1\text{H}$  NMR (300 MHz,  $\text{CDCl}_3$ ,  $\delta$  ppm): 5.60-5.50 (2H, m,  $\text{CH}=\text{CH}$ ) ; 4.69 (1H, ABX,  $J_{\text{AX}}=6.5\text{Hz}$ ,  $J_{\text{BX}}=5.5\text{Hz}$ ,  $\text{CHOTIPS}$ ) ; 3.70 (2H, td,  $J=6.5\text{Hz}$ , 1Hz,  $\text{CH}_2\text{OH}$ ) ; 3.55 (1H, ABX,  $J_{\text{AB}}=11\text{Hz}$ ,  $J_{\text{BX}}=5.5\text{Hz}$ ,  $\text{CHHCl}$ ) ; 3.40 (1H, ABX,  $J_{\text{AB}}=11\text{Hz}$ ,  $J_{\text{AX}}=6.5\text{Hz}$ ,  $\text{CHHCl}$ ) ; 2.40 (2H, m,  $\text{CH}_2\text{CH}=\text{CH}$ ) ; 1.10-0.85 (21H, m, TIPS).  $^{13}\text{C}$  NMR (75 MHz,  $\text{CDCl}_3$ ,  $\delta$  ppm): 133.07, 128.22, 69.05, 61.83, 48.74, 31.60, 17.87, 12.20. IR (film,  $\nu$   $\text{cm}^{-1}$ ): 3333, 2944, 2866, 1654, 1094. MS (M -  $\text{C}_3\text{H}_7$ ) $^+$ : 263. HRMS calcd: 263.1234 (M -  $\text{C}_3\text{H}_7$ ) $^+$ ; found: 263.1239.

### Mesylate 10

To a solution of alcohol **9** (1.74 g, 5.68 mmol) in  $\text{CH}_2\text{Cl}_2$  (56 mL) at  $0^\circ\text{C}$  were added triethylamine (1.15 mL, 7.95 mmol), methanesulfonyl chloride (0.53 mL, 6.81 mmol) and 4-dimethylaminopyridine (69 mg, 0.57 mmol). After stirring for 30 min at  $0^\circ\text{C}$ , the mixture was quenched with sat  $\text{NH}_4\text{Cl}$  (50 mL), then extracted with  $\text{CH}_2\text{Cl}_2$  (3 x 50 mL). The organic layer was dried over  $\text{MgSO}_4$  and the solvent was evaporated *in vacuo*. The residue was chromatographed on silica gel with 20% EtOAc in hexanes to give **10** (2.13 g, 98%).

$^1\text{H}$  NMR (300 MHz,  $\text{CDCl}_3$ ,  $\delta$  ppm): 5.60-5.55 (2H, m,  $\text{CH}=\text{CH}$ ) ; 4.65 (1H, ABX,  $J_{\text{AX}}=7\text{Hz}$ ,  $J_{\text{BX}}=5.5\text{Hz}$ ,  $\text{CHOTIPS}$ ) ; 4.25 (2H, t,  $J=6.5\text{Hz}$ ,  $\text{CH}_2\text{OSO}_2$ ) ; 3.55 (1H, ABX,  $J_{\text{AB}}=11\text{Hz}$ ,  $J_{\text{BX}}=5.5\text{Hz}$ ,  $\text{CHHCl}$ ) ; 3.40 (1H, ABX,  $J_{\text{AB}}=11\text{Hz}$ ,  $J_{\text{AX}}=7\text{Hz}$ ,  $\text{CHHCl}$ ) ; 3.00 (3H, s,  $\text{CH}_3$ ) ; 2.60-2.55 (2H, td,  $J=6.5\text{Hz}$ ,  $6\text{Hz}$ ,  $\text{CH}_2\text{CH}=\text{CH}$ ) ; 1.20-0.90 (21H, m, TIPS).  $^{13}\text{C}$  NMR (75 MHz,  $\text{CDCl}_3$ ,  $\delta$  ppm): 134.13, 125.85, 68.90, 68.58, 48.53, 37.33, 28.30, 17.86, 12.24. IR (film,  $\nu$   $\text{cm}^{-1}$ ): 2945, 2867, 1464, 1177. MS ( $\text{M} - \text{C}_3\text{H}_7$ ) $^+$ : 341. ( $\text{M} - \text{CH}_2\text{Cl}$ ) $^+$ : 335. HRMS calcd: 341.1009 ( $\text{M} - \text{C}_3\text{H}_7$ ) $^+$ ; found: 341.1016.

### Malonate 11

To a solution of sodium hydride in a mixture of THF and DMF (1/1, 76 mL) at  $0^\circ\text{C}$ , dimethyl-malonate was added dropwise. The resulting mixture was stirred at room temperature 20 min then the mesylate **10** (2.49 g, 7.63 mmol) and potassium iodide (2.53 g, 15.27 mmol) were added. The solution was stirred at  $80^\circ\text{C}$  for 3 h. The mixture was quenched at room temperature with sat  $\text{NH}_4\text{Cl}$  (70 mL) and extracted with a mixture of  $\text{Et}_2\text{O}$  and hexane (1/1, 3 x 70 mL). The organic layer was dried over  $\text{MgSO}_4$ , the solvent was removed, and the residue was chromatographed on silica gel with 20%  $\text{Et}_2\text{O}$  in hexane yielded **11** (2.56 g, 80%).

$^1\text{H}$  NMR (300 MHz,  $\text{CDCl}_3$ ,  $\delta$  ppm): 5.50-5.25 (2H, m,  $\text{CH}=\text{CH}$ ) ; 4.65 (1H, ABX,  $J_{\text{BX}}=6\text{Hz}$ ,  $J_{\text{AX}}=6.5\text{Hz}$ ,  $\text{CHOTIPS}$ ) ; 3.75 (6H, s,  $\text{CH}_3\text{O}$ ) ; 3.50 (1H, ABX,  $J_{\text{AB}}=11\text{Hz}$ ,  $J_{\text{BX}}=6\text{Hz}$ ,  $\text{CHHCl}$ ) ; 3.40 (1H, t,  $J=7\text{Hz}$ ,  $\text{CHCO}_2\text{Me}$ ) ; 3.35 (1H, ABX,  $J_{\text{AB}}=11\text{Hz}$ ,  $J_{\text{AX}}=6.5\text{Hz}$ ,  $\text{CHHCl}$ ) ; 2.15-2.05 (2H, m,  $\text{CH}_2\text{-CH}=\text{CH}$ ) ; 2.00-1.95 (2H, m,  $\text{CH}_2\text{CH}$ ) ; 1.10-0.85 (21H, m, TIPS).  $^{13}\text{C}$  NMR (75 MHz,  $\text{CDCl}_3$ ,  $\delta$  ppm): 169.37, 131.96, 130.18, 68.95, 52.34, 50.83, 48.68, 28.38, 25.81, 17.84, 12.18. IR (film,  $\nu$   $\text{cm}^{-1}$ ): 2946, 2807, 1755, 1738, 1469, 1434, 1249. MS ( $\text{M} - \text{C}_3\text{H}_7$ ) $^+$ : 377. ( $\text{M} - \text{CH}_2\text{Cl}$ ) $^+$ : 371. HRMS calcd: 377.1551 ( $\text{M} - \text{C}_3\text{H}_7$ ) $^+$ ; found: 377.1556.

### Ether 13

To a solution of the iodoalcohol **12** (1.32 g, 7.16 mmol) in  $\text{CH}_2\text{Cl}_2$  (50 mL), were added *p*-toluenesulfonic acid (181 mg, 0.72 mmol) and 3,4-dihydro-2H-pyran (1 mL, 10.97 mmol) at room temperature. The solution was stirred overnight in the dark. The mixture was quenched with saturated aqueous  $\text{NaHCO}_3$  (50 mL) and extracted with  $\text{Et}_2\text{O}$  (3 x 50 mL). The organic layer was dried over  $\text{MgSO}_4$ , the solvent was removed, and the residue was chromatographed on silica gel with 20%  $\text{Et}_2\text{O}$  in hexanes to give **13** (1.82 g, 95%).

$^1\text{H}$  NMR (300 MHz,  $\text{CDCl}_3$ ,  $\delta$  ppm): 6.48 (1H, ddd,  $J=8\text{Hz}$ ,  $6\text{Hz}$ ,  $5\text{Hz}$ ,  $\text{CH}=\text{CH}$ ) ; 6.40 (1H, dt,  $J=8\text{Hz}$ ,  $1.5\text{Hz}$ ,  $\text{CH}=\text{CH}$ ) ; 4.65 (1H, m,  $\text{OCHO}$ ) ; 4.28 (1H, complex system AB appearing as a ddd,  $J_{\text{AB}}=13.5\text{Hz}$ ,  $J=5\text{Hz}$ ,  $J=1.5\text{Hz}$ ,  $\text{CHHOTHP}$ ) ; 4.12 (1H, complex system AB appearing as a ddd,  $J_{\text{AB}}=13.5\text{Hz}$ ,  $J=6\text{Hz}$ ,  $J=1.5\text{Hz}$ ,  $\text{CHHOTHP}$ ) ; 3.90-3.85 (1H, m,  $\text{CHHO THP}$ ) ; 3.55-3.50 (1H, m,  $\text{CHHO THP}$ ) ; 1.85-1.5 (6H, m,  $\text{CH}_2\text{THP}$ ).  $^{13}\text{C}$  NMR (75 MHz,  $\text{CDCl}_3$ ,  $\delta$  ppm): 138.29, 98.42, 82.79, 69.99, 62.2, 30.49, 25.36, 19.34. IR (film,  $\nu$   $\text{cm}^{-1}$ ): 2945, 2865, 1612, 1447. MS ( $\text{M} - \text{OTHP}$ ) $^+$ : 167 HRMS calcd: 166.9358 ( $\text{M} - \text{OTHP}$ ) $^+$ ; found: 166.9363.

## Ether 15

To the compound **14** (2.29 g, 6.17 mmol) in  $\text{CH}_2\text{Cl}_2$  (40 mL), imidazole (1.05 g, 15.43 mmol) and *t*-butyldimethylsilyl chloride (1.12 g, 7.4 mmol) were added at 0°C. After stirring for 1 h at room temperature, water was added (40 mL), and the solution was extracted with  $\text{CH}_2\text{Cl}_2$  (3 x 40 mL). The organic layer was dried over  $\text{MgSO}_4$ , the solvent was removed and the residue was chromatographed on silica gel with 10%  $\text{Et}_2\text{O}$  in hexane yielding **15** as an oil (2.65 g, 93%).

$^1\text{H}$  NMR (300 MHz,  $\text{CDCl}_3$ ,  $\delta$  ppm): 6.17 (1H,  $\text{ABX}$ ,  $J_{\text{AB}}=19\text{Hz}$ ,  $J_{\text{AX}}=1.5\text{Hz}$ ,  $\text{CH}=\text{CHSn}$ ); 6.05 (1H,  $\text{ABX}$ ,  $J_{\text{AB}}=19\text{Hz}$ ,  $J_{\text{BX}}=4\text{Hz}$ ,  $\text{CH}=\text{CHSn}$ ); 4.20 (2H,  $\text{ABX}$ ,  $J_{\text{BX}}=4\text{Hz}$ ,  $J_{\text{AX}}=1.5\text{Hz}$ ,  $\text{CH}_2\text{OTBDMS}$ ); 1.60-1.43 (6H, m,  $\text{CH}_2\text{Sn}$ ); 1.40-1.25 (6H, m,  $\text{CH}_2\text{CH}_2\text{Sn}$ ); 1.00-0.75 (24H, m,  $\text{CH}_3\text{CH}_2\text{CH}_2\text{CH}_2\text{Sn}$ ,  $\text{C}(\text{CH}_3)_3$ ); 0.05 (6H, s,  $\text{CH}_3\text{Si}$ ).  $^{13}\text{C}$  NMR (75 MHz,  $\text{CDCl}_3$ ,  $\delta$  ppm): 147.25, 126.77, 66.69, 28.94, 27.21, 25.92, 13.67, 9.36, -5.17. IR (film,  $\nu$   $\text{cm}^{-1}$ ): 2928, 2855, 1463, 1361, 1253, 1093. MS ( $\text{M} - \text{C}_4\text{H}_9$ ) $^+$ : 405. HRMS calcd: 405.1636 ( $\text{M} - \text{C}_4\text{H}_9$ ) $^+$ ; found: 405.1639.

## Diene 18

To a solution of the alcohol **12** (0.82 g, 4.39 mmol) in *N,N*-dimethylformamide (45 mL), the compound **15** (2.79 g, 5.75 mmol) was added and the mixture was degassed. *Bis*-acetonitrile palladium-chloride (57 mg, 0.22 mmol) was added and the mixture was degassed again. The solution was stirred for 3 h at room temperature, quenched with saturated  $\text{NH}_4\text{Cl}$  (50 mL) and extracted with a mixture of  $\text{Et}_2\text{O}$  and hexane (1/1, 3 x 50 mL). The organic layer was dried over  $\text{MgSO}_4$ , the solvent was removed and the residue was chromatographed on silica gel with 20%  $\text{Et}_2\text{O}$  in hexane to yield **18** as an oil (0.8 g, 80%).

$^1\text{H}$  NMR (300 MHz,  $\text{CDCl}_3$ ,  $\delta$  ppm): 6.55 (1H, dd,  $J=15\text{Hz}$ ,  $11\text{Hz}$ ,  $\text{CH}=\text{CHCH}=\text{CH}$ ); 6.10 (1H, t,  $J=11\text{Hz}$ ,  $\text{CH}=\text{CHCH}=\text{CH}$ ); 5.80 (1H, dt,  $J=15\text{Hz}$ ,  $5\text{Hz}$ ,  $\text{CH}=\text{CHCH}=\text{CH}$ ); 5.58 (1H, m,  $\text{CH}=\text{CHCH}=\text{CH}$ ); 4.30 (2H, td,  $J=6\text{Hz}$ ,  $1\text{Hz}$ ,  $\text{CH}_2\text{OH}$ ); 4.25 (2H, dd,  $J=4.5\text{Hz}$ ,  $1.5\text{Hz}$ ,  $\text{CH}_2\text{OTBDMS}$ ); 1.30-0.90 (9H, m,  $(\text{CH}_3)_3\text{C}$ ); 0.05 (6H, s,  $\text{CH}_3\text{Si}$ ).  $^{13}\text{C}$  NMR (75 MHz,  $\text{CDCl}_3$ ,  $\delta$  ppm): 134.63, 129.85, 129.25, 124.08, 63.28, 58.61, 25.89, 18.37, -5.27. IR (film,  $\nu$   $\text{cm}^{-1}$ ): 3345, 2929, 2857, 1656, 1613, 1471. MS ( $\text{M} - \text{C}_4\text{H}_9$ ) $^+$ : 171; ( $\text{M} - \text{H}_2\text{O}$ ) $^+$ : 210. HRMS calcd: 171.0841 ( $\text{M} - \text{C}_4\text{H}_9$ ) $^+$ ; found: 171.0846; calcd: 210.1440 ( $\text{M} - \text{H}_2\text{O}$ ) $^+$ ; found: 210.1447.

## Diene 19

To a solution of alcohol **18** (0.50 g, 2.2 mmol) in *N,N*-dimethylformamide (20 mL) at 0°C were added 2,4,6-collidine (1.16 mL, 8.78 mmol) methanesulfonyl chloride (0.68 mL, 8.78 mmol) and dry lithium chloride (372 mg, 8.78 mmol). The solution was stirred at 0°C for 3 h and water (20 mL) was added. The mixture was extracted with hexane and ether (1/1, 3 x 30 mL). The organic layer was dried over  $\text{MgSO}_4$ , the solvent was removed, and the residue was chromatographed on silica gel with 20%  $\text{Et}_2\text{O}$  in hexanes yielding **19** as an oil (0.43 g, 80%).

$^1\text{H}$  NMR (300 MHz,  $\text{CDCl}_3$ ,  $\delta$  ppm): 6.55 (1H, dd,  $J=15\text{Hz}$ ,  $11\text{Hz}$ ,  $\text{CH}=\text{CHCH}=\text{CH}$ ); 6.10 (1H, t,  $J=11\text{Hz}$ ,  $\text{CH}=\text{CHCH}=\text{CH}$ ); 5.90 (1H, dt,  $J=15\text{Hz}$ ,  $4.5\text{Hz}$ ,  $\text{CH}=\text{CHCH}=\text{CH}$ ); 5.60 (1H, dt,  $J=11\text{Hz}$ ,  $8\text{Hz}$ ,  $\text{CH}=\text{CHCH}=\text{CH}$ ); 4.30 (2H, dd,  $J=4.5\text{Hz}$ ,  $1\text{Hz}$ ,  $\text{CH}_2\text{OTBDMS}$ ); 4.21 (2H, d,  $J=8\text{Hz}$ ,  $\text{CH}_2\text{Cl}$ ); 1.30-0.90 (9H, m,  $(\text{CH}_3)_3\text{C}$ ); 0.05 (6H, s,  $\text{CH}_3\text{Si}$ ).  $^{13}\text{C}$  NMR (75 MHz,  $\text{CDCl}_3$ ,  $\delta$  ppm): 136.47, 132.27, 124.96, 122.92, 63.15, 39.51, 25.89, 18.35, -5.27. IR (film,  $\nu$   $\text{cm}^{-1}$ ): 2955, 2857, 1651, 1613, 1471. MS ( $\text{M} - \text{C}_4\text{H}_9$ ) $^+$ : 189; ( $\text{M} - \text{Cl}$ ) $^+$ : 211. HRMS calcd: 189.0502 ( $\text{M} - \text{C}_4\text{H}_9$ ) $^+$ ; found: 189.0502.

## triene 20

To a solution of sodium hydride (215 mg, 5.38 mmol) in N,N-dimethylformamide and tetrahydrofuran (1/1, 40 mL) at 0°C, the compound **11** (2.16 g, 5.13 mmol) was added dropwise via a cannula. The mixture was stirred at room temperature during 20 min, cooled at 0°C and the diene **17** (1.22 g, 5.65 mmol) in tetrahydrofuran (5 mL) was added dropwise via a cannula. The solution was stirred at room temperature for 17 h and quenched with sat. NH<sub>4</sub>Cl (40 mL). The mixture was extracted with hexane and ether (1/1, 3 x 30 mL). The organic layer was dried over MgSO<sub>4</sub>, the solvent was removed, and the residue was chromatographed on silica gel with toluene yielding **20** as an oil (2.68 g, 87%).

<sup>1</sup>H NMR (300 MHz, CDCl<sub>3</sub>, δ ppm): 6.40 (1H, dd, J=15Hz, 11Hz, CH=CHCH=CH); 6.05 (1H, t, J=11Hz, CH=CHCH=CH); 5.60-5.40 (4H, m, CH=CHCH=CH, CH=CH); 4.65-4.60 (2H, m, CHOTIPS, OCHO); 4.30 (1H, complex AB, J<sub>AB</sub>=13Hz, J=6.5Hz, CHHOTHP); 4.20 (1H, complex AB, J<sub>AB</sub>=13Hz, J=7Hz, CHHOTHP); 3.90-3.80 (1H, m, CHHO THP); 3.75 (6H, s, CH<sub>3</sub>O); 3.55-3.50 (2H, m, CHHCl, CHHO THP); 3.35 (1H, ABX, J<sub>AB</sub>=11Hz, J<sub>AX</sub>=6.5Hz, CHHCl); 2.70 (2H, d, J=7.5Hz, CCH<sub>2</sub>CH=CHCH=CH); 2.00-1.45 (10H, m, CH<sub>2</sub>); 1.10-0.90 (21H, m, TIPS). <sup>13</sup>C NMR (75 MHz, CDCl<sub>3</sub>, δ ppm): 171.22, 131.45, 130.82, 130.60, 129.13, 126.61, 97.72, 69.09, 62.63, 62.10, 57.53, 53.41, 52.38, 48.72, 36.47, 32.45, 30.56, 25.41, 23.12, 19.39, 17.92, 12.22. IR (film, ν cm<sup>-1</sup>): 2947, 2867, 1732, 1655, 1454, 1441. MS (M – C<sub>3</sub>H<sub>7</sub>)<sup>+</sup>: 557.

HRMS calcd: 557.2701 (M – C<sub>3</sub>H<sub>7</sub>)<sup>+</sup>; found: 557.2708.

## Triene 21

The same method was applied from **11** (1.53 g, 3.62 mmol) and **19** (0.98 g, 3.99 mmol) and gave **21** as an oil (2.2 g, 96%).

<sup>1</sup>H NMR (300 MHz, CDCl<sub>3</sub>, δ ppm): 6.50 (1H, dd, J=15Hz, 11Hz, CH=CHCH=CH); 6.10 (1H, t, J=11Hz, CH=CHCH=CH); 5.80 (1H, dt, J=15Hz, 5Hz, CH=CHCH=CH); 5.50-5.30 (2H, m, CH=CHCH=CH, CH=CH); 5.20 (1H, dt, J=8Hz, 7.5Hz, CH=CH); 4.60 (1H, ABX, J<sub>AX</sub>=6.5Hz, J<sub>BX</sub>=6Hz, CHOTIPS); 4.20 (2H, d, J=5Hz, CH<sub>2</sub>OTBDMS); 3.70 (3H, s, CH<sub>3</sub>O); 3.68 (3H, s, CH<sub>3</sub>O); 3.45 (1H, ABX, J<sub>AB</sub>=11Hz, J<sub>BX</sub>=6Hz, CHHCl); 3.35 (1H, ABX, J<sub>AB</sub>=11Hz, J<sub>AX</sub>=6.5Hz, CHHCl); 2.80 (2H, d, J=8Hz, CCH<sub>2</sub>CH=CH); 2.00-1.90 (4H, m, CH<sub>2</sub>CH<sub>2</sub>); 1.10-0.90 (21H, m, TIPS); 0.9 (9H, s, (CH<sub>3</sub>)<sub>3</sub>C); 0.05 (6H, s, CH<sub>3</sub>Si). <sup>13</sup>C NMR (75 MHz, CDCl<sub>3</sub>, δ ppm): 171.35, 134.45, 131.58, 131.49, 130.59, 124.25, 123.67, 69.08, 63.46, 57.33, 52.4, 52.34, 48.79, 32.25, 30.91, 25.86, 23.15, 17.90, 12.23, -5.28. IR (film, ν cm<sup>-1</sup>): 2949, 2865, 1738, 1654, 1463, 1254. MS (M – C<sub>3</sub>H<sub>7</sub>)<sup>+</sup>: 587. HRMS calcd: 587.2991 (M – C<sub>3</sub>H<sub>7</sub>)<sup>+</sup>; found: 587.2980.

## Alcohol 22

To a solution of THP ether **20** (2.68 g, 4.46 mmol) in methanol (50 mL), *para*-toluene-sulfonic acid (42 mg, 0.23 mmol) was added. The mixture was stirred for 2 h at room temperature, and quenched with NaHCO<sub>3</sub> sat (30 mL). The methanol was removed in vacuo and extracted with ether (3 x 45 mL). The organic layer was dried over MgSO<sub>4</sub>, the solvent was removed, and the residue was chromatographed on silica gel with 20% Et<sub>2</sub>O in hexanes yielding **22** as an oil (1.72 g, 75%).

<sup>1</sup>H NMR (300 MHz, CDCl<sub>3</sub>, δ ppm): 6.35 (1H, dd, J=14.5Hz, 11Hz, CH=CHCH=CH); 6.00 (1H, t, J=11Hz, CH=CHCH=CH); 5.60-5.30 (4H, m, CH=CHCH=CH, CH=CH); 4.60 (1H, ABX, J<sub>AX</sub>=6.5Hz, J<sub>BX</sub>=6Hz, CHOTIPS); 4.30 (2H, dd, J=7Hz, 1Hz, CH<sub>2</sub>OH); 3.70 (6H, s, CH<sub>3</sub>O); 3.50 (1H, ABX, J<sub>AB</sub>=11Hz, J<sub>BX</sub>=6Hz, CHHCl); 3.35 (1H, ABX, J<sub>AB</sub>=11Hz, J<sub>AX</sub>=6.5Hz, CHHCl); 2.70 (2H, d, J=7.5Hz, CCH<sub>2</sub>CH=CH); 2.00-1.85 (4H, m, CH<sub>2</sub>CH<sub>2</sub>); 1.10-0.90 (21H, m, TIPS). <sup>13</sup>C NMR (75 MHz, CDCl<sub>3</sub>, δ ppm): 171.28, 131.51, 130.60, 130.12, 129.43, 129.06, 128.81,

69.12, 58.71, 52.46, 48.72, 36.43, 32.49, 23.13, 17.95, 17.90, 12.24. IR (film,  $\nu$   $\text{cm}^{-1}$ ): 3367, 2947, 2866, 1731, 1654, 1454. MS ( $M - \text{C}_3\text{H}_7$ )<sup>+</sup>: 473. HRMS calcd: 473.2126 ( $M - \text{C}_3\text{H}_7$ )<sup>+</sup>; found: 473.2119.

### Chloride 23

To a solution of alcohol **22** (1.73 g, 3.34 mmol) in tetrahydrofuran (59 mL) at  $-20^\circ\text{C}$  were added triphenylphosphine (1.75 g, 6.64 mmol) and hexachloroacetone (0.76 mL, 5 mmol). After 5 min, the solution was quenched with sat.  $\text{NH}_4\text{Cl}$  (50 mL) and extracted with ether (3 x 40 mL). The organic layer was dried over  $\text{MgSO}_4$ , the solvent was removed and the residue was chromatographed on silica gel with 20%  $\text{Et}_2\text{O}$  in hexane yielding **23** as an oil (1.78 g, 98%).

$^1\text{H}$  NMR (300 MHz,  $\text{CDCl}_3$ ,  $\delta$  ppm): 6.35 (1H, dd,  $J=15\text{Hz}$ ,  $11\text{Hz}$ ,  $\text{CH}=\text{CHCH}=\text{CH}$ ); 6.10 (1H, t,  $J=11\text{Hz}$ ,  $\text{CH}=\text{CHCH}=\text{CH}$ ); 5.65 (1H, dt,  $J=15\text{Hz}$ ,  $7.5\text{Hz}$ ,  $\text{CH}=\text{CHCH}=\text{CH}$ ); 5.55 (1H, dt,  $J=10.5\text{Hz}$ ,  $8\text{Hz}$ ,  $\text{CH}=\text{CHCH}=\text{CH}$ ); 5.50-5.30 (2H, m,  $\text{CH}=\text{CH}$ ); 4.60 (1H, ABX,  $J_{\text{AX}}=6.5\text{Hz}$ ,  $J_{\text{BX}}=6\text{Hz}$ ,  $\text{CHOTIPS}$ ); 4.15 (2H, d,  $J=8\text{Hz}$ ,  $\text{CH}_2\text{Cl}$ ); 3.70 (6H, s,  $\text{CH}_3\text{O}$ ); 3.50 (1H, ABX,  $J_{\text{AB}}=11\text{Hz}$ ,  $J_{\text{BX}}=6\text{Hz}$ ,  $\text{CHCHHCl}$ ); 3.35 (1H, ABX,  $J_{\text{AB}}=11\text{Hz}$ ,  $J_{\text{AX}}=6.5\text{Hz}$ ,  $\text{CHCHHCl}$ ); 2.75 (2H, d,  $J=7.5\text{Hz}$ ,  $\text{CCH}_2\text{CH}=\text{CH}$ ); 2.00-1.85 (4H, m,  $\text{CH}_2\text{CH}_2$ ); 1.10-0.90 (21H, m, TIPS).  $^{13}\text{C}$  NMR (75 MHz,  $\text{CDCl}_3$ ,  $\delta$  ppm): 171.20, 132.29, 131.57, 131.21, 130.54, 127.87, 125.02, 69.13, 52.52, 48.72, 39.31, 36.56, 32.60, 23.15, 17.95, 17.90, 12.25. IR (film,  $\nu$   $\text{cm}^{-1}$ ): 2949, 2867, 1785, 1731, 1651, 1453, 1201. MS ( $M - \text{C}_3\text{H}_7$ )<sup>+</sup>: 491. HRMS calcd: 491.1787 ( $M - \text{C}_3\text{H}_7$ )<sup>+</sup>; found: 491.1792.

### Substituted malonate 24

To a solution of NaH (267 mg, 6.67 mmol) in  $N,N$ -dimethylformamide and tetrahydrofuran (1/1, 65 mL) at  $0^\circ\text{C}$  was added dropwise the dimethylmalonate (0.76 mL, 6.68 mmol). The mixture was stirred at room temperature during 20 min and a solution of the allyl chloride **23** (1.78 g, 3.34 mmol) and potassium iodide (1.1 g, 6.67 mmol) in tetrahydrofuran (5 mL) was added dropwise at  $0^\circ\text{C}$ . The mixture was stirred at room temperature for 2h, quenched with sat.  $\text{NH}_4\text{Cl}$  (50 mL) and extracted with ether and hexane (1/1, 3 x 50 mL). The organic layer was dried over  $\text{MgSO}_4$ , the solvent was removed, and the residue was chromatographed on silica gel with 20%  $\text{Et}_2\text{O}$  in hexane yielding **24** as an oil (1.89 g, 90%).

$^1\text{H}$  NMR (300 MHz,  $\text{CDCl}_3$ ,  $\delta$  ppm): 6.35 (1H, dd,  $J=15\text{Hz}$ ,  $11\text{Hz}$ ,  $\text{CH}=\text{CHCH}=\text{CH}$ ); 6.00 (1H, t,  $J=11\text{Hz}$ ,  $\text{CH}=\text{CHCH}=\text{CH}$ ); 5.65-5.25 (4H, m,  $\text{CH}=\text{CHCH}=\text{CH}$ ,  $\text{CH}=\text{CH}$ ); 4.60 (1H, ABX,  $J_{\text{AX}}=6.5\text{Hz}$ ,  $J_{\text{BX}}=6\text{Hz}$ ,  $\text{CHOTIPS}$ ); 3.72 (12H, s,  $\text{CH}_3\text{O}$ ); 3.50 (1H, ABX,  $J_{\text{AB}}=11\text{Hz}$ ,  $J_{\text{BX}}=6\text{Hz}$ ,  $\text{CHHCl}$ ); 3.40 (1H, t,  $J=7.5\text{Hz}$ ,  $\text{CH}(\text{CO}_2\text{CH}_3)_2$ ); 3.35 (1H, ABX,  $J_{\text{AB}}=11\text{Hz}$ ,  $J_{\text{AX}}=6.5\text{Hz}$ ,  $\text{CHHCl}$ ); 2.70-2.60 (4H, m,  $\text{CCH}_2\text{CH}=\text{CH}$ ); 2.00-1.80 (4H, m,  $\text{CH}_2\text{CH}_2$ ); 1.10-0.90 (21H, m, TIPS).  $^{13}\text{C}$  NMR (75 MHz,  $\text{CDCl}_3$ ,  $\delta$  ppm): 171.27, 169.13, 131.46, 130.80, 130.60, 128.87, 128.73, 125.55, 69.09, 57.59, 52.49, 52.43, 51.45, 48.76, 36.49, 32.47, 27.09, 23.14, 17.99, 12.23. IR (film,  $\nu$   $\text{cm}^{-1}$ ): 2951, 2867, 1731, 1435. MS ( $M - \text{C}_3\text{H}_7$ )<sup>+</sup>: 587. HRMS calcd: 587.2443 ( $M - \text{C}_3\text{H}_7$ )<sup>+</sup>; found: 587.2446.

### chlorohydrine 25

To a solution of silyl ether **24** (0.69 g, 1.1 mmol) in tetrahydrofuran (12 mL) at  $-20^\circ\text{C}$  was added 1 M tetra-*n*-butylammonium fluoride (2.75 mL, 2.75 mmol). The solution was stirred at  $-20^\circ\text{C}$  during 2 h. The solution was quenched with sat.  $\text{NH}_4\text{Cl}$  (20 mL) and extracted with ether (3 x 20 mL). The organic layer was dried over  $\text{MgSO}_4$ , the solvent was removed and the residue was chromatographed on silica gel with 40%  $\text{Et}_2\text{O}$  in hexane yielding **25** as an oil (0.42 g, 80%).

$^1\text{H}$  NMR (300 MHz,  $\text{CDCl}_3$ ,  $\delta$  ppm): 6.39 (1H, dd,  $J=15\text{Hz}$ ,  $11\text{Hz}$ ,  $\text{CH}=\text{CHCH}=\text{CH}$ ); 6.00 (1H, t,  $J=11\text{Hz}$ ,  $\text{CH}=\text{CHCH}=\text{CH}$ ); 5.65-5.35 (3H, m,  $\text{CH}=\text{CHCH}=\text{CH}$ ,  $\text{CH}=\text{CH}$ ); 5.28 (1H, td,  $J=7.5\text{Hz}$ ,  $7\text{Hz}$ ,  $\text{CH}=\text{CHCH}=\text{CH}$ ); 4.55 (1H, m,  $\text{CHOH}$ ); 3.73 (12H, s,  $\text{CH}_3\text{O}$ ); 3.50 (2H, m,  $\text{CH}_2\text{Cl}$ ); 3.40 (1H, t,  $J=7.5\text{Hz}$ ,  $\text{CH}(\text{CO}_2\text{CH}_3)_2$ ); 2.80-2.70 (4H, m,  $\text{CCH}_2\text{CH}=\text{CH}$ ); 2.20-1.90 (4H, m,  $\text{CH}_2\text{CH}_2$ ).  $^{13}\text{C}$  NMR (75 MHz,  $\text{CDCl}_3$ ,  $\delta$  ppm): 171.30, 169.22, 132.92, 130.71, 129.08, 128.99, 128.62, 125.59, 67.59, 57.32, 52.53, 51.47, 51.35, 49.02, 36.34, 32.22, 27.06, 22.82. IR (film,  $\nu\text{ cm}^{-1}$ ): 2951, 2867, 1731, 1435. MS ( $M - \text{OCH}_3$ ) $^+$ : 443; ( $M - \text{Cl}$ ) $^+$ : 439. HRMS calcd: 443.1473 ( $M - \text{OCH}_3$ ) $^+$ ; found: 443.1465.

### Chloroketone 26

To a solution of chlorohydrine **25** (124 mg, 0.26 mmol) in dichloromethane (6 mL) was added diisopropylamine (37  $\mu\text{L}$ , 0.26 mmol) and Dess-Martin reagent (382 mg, 0.78 mmol). The mixture was stirred at room temperature during 20 min. The solution was quenched with 10%  $\text{Na}_2\text{S}_2\text{O}_3$  (10 mL), extracted with dichloromethane (3 x 15 mL). The organic layer was dried over  $\text{MgSO}_4$ , the solvent was removed, and the residue was chromatographed on Florisil (treated with  $\text{Et}_3\text{N}$ ) with 40%  $\text{Et}_2\text{O}$  in hexane yielding **26** as an oil (104 mg, 85%).

$^1\text{H}$  NMR (300 MHz,  $\text{CD}_2\text{Cl}_2$ ,  $\delta$  ppm): 6.40 (1H, ddd,  $J=15\text{Hz}$ ,  $11\text{Hz}$ ,  $1\text{Hz}$ ,  $\text{CH}=\text{CHCH}=\text{CH}$ ); 6.35-6.20 (2H, m,  $\text{CH}=\text{CH}$ ); 6.00 (1H, t,  $J=11\text{Hz}$ ,  $\text{CH}=\text{CHCH}=\text{CH}$ ); 5.55 (1H, dt,  $J=15\text{Hz}$ ,  $8\text{Hz}$ ,  $\text{CH}=\text{CH}-\text{CH}=\text{CH}$ ); 5.30 (1H, dt,  $J=11\text{Hz}$ ,  $8\text{Hz}$ ,  $\text{CH}=\text{CHCH}=\text{CH}$ ); 4.15 (2H, s,  $\text{CH}_2\text{Cl}$ ); 3.70 (6H, s,  $\text{OCH}_3$ ); 3.68 (6H, s,  $\text{OCH}_3$ ); 3.40 (1H, t,  $J=7.5\text{Hz}$ ,  $\text{CH}(\text{CO}_2\text{CH}_3)_2$ ); 2.75-2.70 (4H, m,  $\text{CH}=\text{CHCH}=\text{CHCH}_2$ ); 2.60-2.55 (2H, m,  $\text{CH}=\text{CHCH}_2$ ); 2.00-1.95 (2H, m,  $\text{CH}=\text{CHCH}_2\text{CH}_2$ ).  $^{13}\text{C}$  NMR (75 MHz,  $\text{CD}_2\text{Cl}_2$ ,  $\delta$  ppm): 191.63, 171.09, 169.08, 150.02, 130.59, 129.11, 128.75, 125.73, 123.17, 57.44, 52.32, 51.42, 49.29, 35.92, 31.36, 27.02, 24.43. IR (film,  $\nu\text{ cm}^{-1}$ ): 3008, 2956, 2848, 1730, 1695, 1621, 1435. MS ( $M$ ) $^+$ : 472; ( $M - \text{HCl}$ ) $^+$ : 436. HRMS calcd: 472.1500 ( $M$ ) $^+$ ; found: 472.1507; calcd: 436.1733 ( $M - \text{HCl}$ ) $^+$ ; found: 436.1739.

### Alcohol 27

The same method as that used to prepare **22** was applied from **21** (2.2 g, 3.49 mmol) to give **27** as an oil (1.71 g, 95%).

$^1\text{H}$  NMR (300 MHz,  $\text{CDCl}_3$ ,  $\delta$  ppm): 6.50 (1H, dd,  $J=15\text{Hz}$ ,  $11\text{Hz}$ ,  $\text{CH}=\text{CHCH}=\text{CH}$ ); 6.10 (1H, t,  $J=11\text{Hz}$ ,  $\text{CH}=\text{CHCH}=\text{CH}$ ); 5.85 (1H, dt,  $J=15\text{Hz}$ ,  $6\text{Hz}$ ,  $\text{CH}=\text{CHCH}=\text{CH}$ ); 5.45-5.20 (3H, m,  $\text{CH}=\text{CHCH}=\text{CH}$ ,  $\text{CH}=\text{CH}$ ); 4.60 (1H, ABX,  $J_{AX}=6.5\text{Hz}$ ,  $J_{BX}=6\text{Hz}$ ,  $\text{CHOTIPS}$ ); 4.20 (2H, td,  $J=5\text{Hz}$ ,  $1\text{Hz}$ ,  $\text{CH}_2\text{OH}$ ); 3.70 (6H, s,  $\text{CH}_3\text{O}$ ); 3.50 (1H, ABX,  $J_{AB}=11\text{Hz}$ ,  $J_{BX}=6\text{Hz}$ ,  $\text{CHHCl}$ ); 3.35 (1H, ABX,  $J_{AB}=11\text{Hz}$ ,  $J_{AX}=6.5\text{Hz}$ ,  $\text{CHHCl}$ ); 2.80 (2H, d,  $J=7\text{Hz}$ ,  $\text{CCH}_2\text{CH}=\text{CH}$ ); 2.00-1.85 (4H, m,  $\text{CH}_2\text{CH}_2$ ); 1.10-0.90 (21H, m, TIPS).  $^{13}\text{C}$  NMR (75 MHz,  $\text{CDCl}_3$ ,  $\delta$  ppm): 171.38, 133.91, 131.52, 131.35, 130.60, 125.45, 124.54, 69.10, 63.19, 57.3, 52.5, 48.78, 32.18, 30.90, 23.14, 17.94, 12.24. IR (film,  $\nu\text{ cm}^{-1}$ ): 3444, 2950, 2867, 1738, 1667, 1455. MS ( $M - \text{C}_3\text{H}_7$ ) $^+$ : 473. HRMS calcd: 473.2126 ( $M - \text{C}_3\text{H}_7$ ) $^+$ ; found: 473.2135.

### Chloride 28

The same method as that used to prepare **23** was applied from **27** (1.66 g, 3.21 mmol) to give **28** as an oil (1.68 g, 98%).

$^1\text{H}$  NMR (300 MHz,  $\text{CDCl}_3$ ,  $\delta$  ppm): 6.55 (1H, dd,  $J=15\text{Hz}$ ,  $11\text{Hz}$ ,  $\text{CH}=\text{CHCH}=\text{CH}$ ); 6.10 (1H, t,  $J=11\text{Hz}$ ,  $\text{CH}=\text{CHCH}=\text{CH}$ ); 5.85 (1H, dt,  $J=15\text{Hz}$ ,  $7\text{Hz}$ ,  $\text{CH}=\text{CHCH}=\text{CH}$ ); 5.50-5.30 (3H, m,  $\text{CH}=\text{CHCH}=\text{CH}$ ,  $\text{CH}=\text{CH}$ ); 4.60 (1H, ABX,  $J_{AX}=6.5\text{Hz}$ ,  $J_{BX}=6\text{Hz}$ ,  $\text{CHOTIPS}$ ); 4.10 (2H, d,  $J=7\text{Hz}$ ,  $\text{CH}=\text{CHCH}_2\text{Cl}$ ); 3.70 (6H, s,  $\text{CH}_3\text{O}$ ); 3.50 (1H, ABX,  $J_{AB}=11\text{Hz}$ ,  $J_{BX}=6\text{Hz}$ ,  $\text{CHHCl}$ ); 3.35 (1H, ABX,  $J_{AB}=11\text{Hz}$ ,  $J_{AX}=6.5\text{Hz}$ ,  $\text{CHHCl}$ ); 2.80 (2H, d,  $J=8\text{Hz}$ ,  $\text{CCH}_2\text{CH}=\text{CH}$ ); 2.00-1.80 (4H, m,  $\text{CH}_2\text{CH}_2$ ); 1.10-0.90 (21H, m, TIPS).  $^{13}\text{C}$  NMR (75 MHz,  $\text{CDCl}_3$ ,  $\delta$  ppm): 171.23, 131.57,

130.64, 130.50, 129.90, 128.64, 126.44, 69.09, 57.33, 52.53, 48.73, 44.89, 32.2, 30.94, 23.14, 17.92, 12.24. IR (film,  $\nu$   $\text{cm}^{-1}$ ): 2951, 2867, 1794, 1654, 1458, 1201. MS ( $M - \text{C}_3\text{H}_7$ )<sup>+</sup>: 491. HRMS calcd: 491.1787 ( $M - \text{C}_3\text{H}_7$ )<sup>+</sup>; found: 491.1778.

### Substituted malonate 29

The same method as that used to prepare **24** was applied from **28** (1.68 g, 3.15 mmol) to give **29** as an oil (1.41 g, 71%).

<sup>1</sup>H NMR (300 MHz,  $\text{CDCl}_3$ ,  $\delta$  ppm): 6.35 (1H, dd,  $J=15\text{Hz}$ ,  $11\text{Hz}$ ,  $\text{CH}=\text{CHCH}=\text{CH}$ ); 6.05 (1H, t,  $J=11\text{Hz}$ ,  $\text{CH}=\text{CHCH}=\text{CH}$ ); 5.65 (1H, dt,  $J=15\text{Hz}$ ,  $7\text{Hz}$ ,  $\text{CH}=\text{CHCH}=\text{CH}$ ); 5.50-5.30 (2H, m,  $\text{CH}=\text{CH}$ ); 5.20 (1H, br q,  $J=7.5\text{Hz}$ ,  $\text{CH}=\text{CH}-\text{CH}=\text{CH}$ ); 4.60 (1H, ABX,  $J_{\text{AX}}=6.5\text{Hz}$ ,  $J_{\text{BX}}=6\text{Hz}$ , CHOTIPS); 3.75 (6H, s,  $\text{CH}_3\text{O}$ ); 3.70 (6H, s,  $\text{CH}_3\text{O}$ ); 3.50 (1H, ABX,  $J_{\text{AB}}=11\text{Hz}$ ,  $J_{\text{BX}}=6\text{Hz}$ , CHHCl); 3.45 (1H, t,  $J=7.5\text{Hz}$ ,  $\text{CH}(\text{CO}_2\text{CH}_3)_2$ ); 3.35 (1H, ABX,  $J_{\text{AB}}=11\text{Hz}$ ,  $J_{\text{AX}}=6.5\text{Hz}$ , CHHCl); 2.80 (2H, d,  $J=8\text{Hz}$ ,  $\text{CCH}_2\text{CH}=\text{CH}$ ); 2.70 (2H, t,  $J=7.5\text{Hz}$ ,  $\text{CH}_2\text{CH}(\text{CO}_2\text{Me})_2$ ); 2.00-1.90 (4H, m,  $\text{CH}_2\text{CH}_2$ ); 1.05 (21H, m, TIPS). <sup>13</sup>C NMR (75 MHz,  $\text{CDCl}_3$ ,  $\delta$  ppm): 171.34, 169.10, 131.53, 130.74, 130.58, 130.20, 127.76, 123.65, 69.09, 57.32, 52.54, 52.46, 51.58, 48.79, 32.22, 32.04, 30.95, 23.15, 17.9, 12.24. IR (film,  $\nu$   $\text{cm}^{-1}$ ): 2948, 2867, 1737, 1440, 1202. MS ( $M - \text{C}_3\text{H}_7$ )<sup>+</sup>: 587. HRMS calcd: 587.2443 ( $M - \text{C}_3\text{H}_7$ )<sup>+</sup>; found: 587.2446.

### Chlorohydrine 30

The same method as that used to prepare **25** was applied from **29** (0.69 g, 1.1 mmol) to give **27** as an oil (0.44 g, 84%).

<sup>1</sup>H NMR (300 MHz,  $\text{CDCl}_3$ ,  $\delta$  ppm): 6.35 (1H, dd,  $J=15\text{Hz}$ ,  $11\text{Hz}$ ,  $\text{CH}=\text{CHCH}=\text{CH}$ ); 6.05 (1H, t,  $J=11\text{Hz}$ ,  $\text{CH}=\text{CHCH}=\text{CH}$ ); 5.65 (1H, dt,  $J=15\text{Hz}$ ,  $7\text{Hz}$ ,  $\text{CH}=\text{CHCH}=\text{CH}$ ); 5.50 (1H, m,  $\text{CH}=\text{CHCH}=\text{CH}$ ); 5.45 (1H, dd,  $J=11\text{Hz}$ ,  $8\text{Hz}$ ,  $\text{CH}=\text{CH}$ ); 5.15 (1H, dt,  $J=11\text{Hz}$ ,  $7.5\text{Hz}$ ,  $\text{CH}=\text{CH}$ ); 4.55 (1H, m, CHOH); 3.70 (6H, s,  $\text{OCH}_3$ ); 3.68 (6H, s,  $\text{OCH}_3$ ); 3.50 (2H, m,  $\text{CH}_2\text{Cl}$ ); 3.45 (1H, t,  $J=7.5\text{Hz}$ ,  $\text{CH}(\text{CO}_2\text{Me})_2$ ); 2.80 (2H, d,  $J=7.5\text{Hz}$ ,  $\text{CCH}_2\text{CH}=\text{CH}$ ); 2.70 (2H, t,  $J=7\text{Hz}$ ,  $\text{CH}_2\text{CH}(\text{CO}_2\text{Me})_2$ ); 2.11-1.90 (4H, m,  $\text{CH}_2\text{CH}_2$ ). <sup>13</sup>C NMR (75 MHz,  $\text{CDCl}_3$ ,  $\delta$  ppm): 171.40, 169.13, 133.07, 131.57, 130.93, 129.02, 127.65, 123.67, 67.55, 57.14, 52.53, 52.54, 51.5, 49.16, 32.15, 31.98, 30.94, 22.93. IR (film,  $\nu$   $\text{cm}^{-1}$ ): 3522, 3011, 2954, 2846, 1733, 1435. MS ( $M - \text{OCH}_3$ )<sup>+</sup>: 443; ( $M - \text{Cl}$ )<sup>+</sup>: 439. HRMS calcd: 443.1473 ( $M - \text{OCH}_3$ )<sup>+</sup>; found: 443.1465.

### Chloroketone 31

The same method as that used to prepare **26** was applied from **30** (122.5 mg, 0.26 mmol) to give **31** as an oil (105 mg, 85%).

<sup>1</sup>H NMR (300 MHz,  $\text{CD}_2\text{Cl}_2$ ,  $\delta$  ppm): 6.40 (1H, ddd,  $J=15\text{Hz}$ ,  $11\text{Hz}$ ,  $1\text{Hz}$ ,  $\text{CH}=\text{CHCH}=\text{CH}$ ); 6.35-6.20 (2H, m,  $\text{CH}=\text{CHCH}=\text{CH}$ ,  $\text{COCH}=\text{CH}$ ); 6.05 (1H, t,  $J=11\text{Hz}$ ,  $\text{CH}=\text{CHCH}=\text{CH}$ ); 5.65 (1H, dt,  $J=15\text{Hz}$ ,  $7.5\text{Hz}$ ,  $\text{CH}=\text{CHCH}=\text{CH}$ ); 5.25 (1H, br q,  $J=9\text{Hz}$ ,  $\text{COCH}=\text{CH}$ ); 4.25 (2H, s,  $\text{CH}_2\text{Cl}$ ); 3.71 (6H, s,  $\text{OCH}_3$ ); 3.70 (6H, s,  $\text{OCH}_3$ ); 3.45 (1H, t,  $J=7.5\text{Hz}$ ,  $\text{CH}(\text{CO}_2\text{CH}_3)_2$ ); 2.80 (2H, d,  $J=8\text{Hz}$ ,  $\text{CCH}_2\text{CH}=\text{CH}$ ); 2.75 (2H, t,  $J=7.5\text{Hz}$ ,  $\text{CH}_2\text{CH}(\text{CO}_2\text{Me})_2$ ); 2.58 (2H, m,  $\text{COCH}=\text{CHCH}_2$ ); 2.00-1.95 (2H, m,  $\text{COCH}=\text{CHCH}_2\text{CH}_2$ ). <sup>13</sup>C NMR (75 MHz,  $\text{CD}_2\text{Cl}_2$ ,  $\delta$  ppm): 191.58, 171.15, 169.07, 150.07, 131.53, 130.81, 127.75, 123.76, 123.16, 57.25, 52.32, 51.50, 49.36, 41.13, 31.95, 31.28, 30.55, 24.55. IR (film,  $\nu$   $\text{cm}^{-1}$ ): 3008, 2956, 2848, 1730, 1695, 1621, 1435. MS ( $M$ )<sup>+</sup>: 472; ( $M - \text{HCl}$ )<sup>+</sup>: 436. HRMS calcd: 472.1500 ( $M$ )<sup>+</sup>; found: 472.1507; calcd: 436.1733 ( $M - \text{HCl}$ )<sup>+</sup>; found: 436.1739.

### Macrocycle 2

To a solution of cesium carbonate (581.8 mg, 1.50 mmol) and cesium iodide (392 mg, 1.50 mmol) in acetonitrile (67 mL) was added the chloroketone **26** (95.1 mg, 0.2 mmol) in



acetonitrile (1 mL). The solution was stirred at room temperature for 48 h in the dark. The mixture was filtered, the solvent was removed and the residue was chromatographed on silica gel with 40% Et<sub>2</sub>O in hexane yielding **26** as an oil (26 mg, 30%).

<sup>1</sup>H NMR (300 MHz, C<sub>6</sub>D<sub>6</sub>, 375K, δ ppm): 6.40 (1H, dd, J=15Hz, 11Hz, CH=CHCH=CH); 5.98 (1H, t, J=11Hz, CH=CHCH=CH); 5.72 (1H, d, J=11.5Hz, 7Hz, COCH=CH); 5.50-5.40 (2H, m, CH=CHCH=CH); 5.22 (1H, td, J=11.5Hz, 9Hz, COCH=CH); 3.40 (6H, s, OCH<sub>3</sub>); 3.35 (6H, s, OCH<sub>3</sub>); 3.17 (2H, s, COCH<sub>2</sub>); 2.80 (2H, d, J=8Hz, CH=CHCH=CHCH<sub>2</sub>); 2.40 (2H, br q, J=8.5Hz, CH<sub>2</sub>CH=CHCH=CH); 1.90-1.80 (4H, m, CH<sub>2</sub>-CH<sub>2</sub>). <sup>13</sup>C NMR (75 MHz, CDCl<sub>3</sub>, δ ppm): 199.69, 170.60, 142.845, 132.5, 130.75, 130.10, 127.98, 125, 56.16, 54.5, 52.72, 44.38, 35.44, 31.66, 30.29, 29.68, 27.11, 22.1. IR ((CH<sub>2</sub>Cl<sub>2</sub>), ν cm<sup>-1</sup>): 3003, 2955, 1734, 1695, 1628, 1444, 1266, 1221. MS (M)<sup>+</sup>: 436. HRMS calcd: 436.1733 (M)<sup>+</sup>; found: 436.1739. mp: 160-162°C.

### Macrocycle 3

To a solution of cesium carbonate (45 mg, 0.12 mmol) and cesium iodide (30 mg, 0.12 mmol) in acetonitrile (15 mL), the compound **31** (11 mg, 0.02 mmol) in acetonitrile (1 mL) was slowly added via a syringe pump over 10 h at 40°C. The solution was stirred at 40°C for an additional 12 h period. The mixture was filtered and the solvent was removed. The residue was chromatographed on silica gel with 40% Et<sub>2</sub>O in hexane to yield **3** as an oil (1.8 mg, 17%).

<sup>1</sup>H NMR (300 MHz, CDCl<sub>3</sub>, δ ppm): 6.35 (1H, dd, J=15Hz, 11.5Hz, CH=CHCH=CH); 6.15-6.05 (2H, m, CH=CHCH=CH, COCH=CH); 5.75 (1H, dt, J=11.5Hz, 7Hz, CH=CHCH=CH); 5.65 (1H, dt, J=15Hz, 7Hz, CH=CH-CH=CH); 4.95 (1H, br q, J=9Hz, CH<sub>2</sub>CH=CHCO); 3.80 (6H, s, OCH<sub>3</sub>); 3.78 (6H, s, OCH<sub>3</sub>); 3.15-1.8 (10H, br m, CH<sub>2</sub>). <sup>13</sup>C NMR (75 MHz, CDCl<sub>3</sub>, δ ppm): 200.75, 172.13, 172.04, 141.93, 132.69, 131.10, 130.20, 129.47, 125.55, 57.94, 53.99, 53.72, 45.63, 36.77, 31.75, 30.69, 30.44, 24.5. IR (film, ν cm<sup>-1</sup>): 2955, 1732, 1698, 1633, 1436, 1270, 1223. MS (M)<sup>+</sup>: 436. HRMS calcd: 436.1733. found: 436.1739.

### Diels-Alder adduct 33 and its epimer 34

The macrocycle **2** (10 mg, 23 μmol) in toluene (2 mL) in a quartz tube was sealed *in vacuo* and heated in an oven for 2h at 220°C. The solvent was removed and the residue was chromatographed on silica gel with 40% AcOEt in hexane. It was impossible to separate both compounds **33** and **34** at that stage, their relative population was evaluated by integration of the NMR signal corresponding to the alkene (1:1).

The mixture of the two tricycles was then treated with *para*-toluenesulfonic acid (catalytic) in toluene (3 mL) at reflux for 5h. The residue was purified on silica gel with 40% AcOEt in hexane to afford the tricycle **34** (9mg, 87%).

TAT tricycle **34**: <sup>1</sup>H NMR (300 MHz, CDCl<sub>3</sub>, δ ppm): 5.45 (2H, s, CH=CH); 3.75 (6H, s, OCH<sub>3</sub>); 3.74 (3H, s, OCH<sub>3</sub>); 3.69 (3H, s, OCH<sub>3</sub>); 2.90 (1H, dd, J=13Hz, 3Hz, CHHCO); 2.72 (1H, d, J=13Hz, CHHCO); 2.60-2.50 (2H, m, CH); 2.45-2.30 (3H, m, COCHCHCH=CH, CH); 2.15 (1H, t, J=11Hz, CHCO, this coupling proves the TAT ring junction); 1.95-1.80 (2H, m, CH); 1.75 (1H, dt, J=14Hz, 4Hz, CH); 1.60-1.40 (3H, m, CH); 1.11-0.90 (2H, m, CH). <sup>13</sup>C NMR (75 MHz, CDCl<sub>3</sub>, δ ppm): 206.68, 172.41, 171.62, 170.60, 170.41, 131.72, 128.51, 57.73, 55.63, 55.35, 53.21, 53.11, 52.7, 52.55, 46.25, 40.32, 38.55, 38.16, 37.89, 37.52, 36.93, 31.29, 29.69, 25.7, 22.68. IR (film, ν cm<sup>-1</sup>): 2956, 2854, 1731, 1450, 1436, 1258. MS (M)<sup>+</sup>: 436. HRMS calcd: 436.1733 (M)<sup>+</sup>; found: 436.1730.

CST tricycle **33**: Only a few <sup>1</sup>H NMR signals could be attributed for this compound which could not be separated from its epimer **34**: <sup>1</sup>H NMR (300 MHz, CDCl<sub>3</sub>, δ ppm): 5.66 (1H,

complex AB system appearing as a doublet of doublet,  $J_{AB}=10\text{Hz}$ ,  $J=3.5\text{Hz}$ ,  $\text{CH}=\text{CH}$ ); 5.57 (1H, complex AB system appearing as a doublet of doublet,  $J_{AB}=10\text{Hz}$ ,  $J=4\text{Hz}$ ,  $\text{CH}=\text{CH}$ ); 3.72 (3H, s,  $\text{OCH}_3$ ).

### Diels-Alder adduct **35** and its epimer **36**

The macrocycle **3** (1.6 mg, 3.6  $\mu\text{mol}$ ) in toluene (2 mL) in a quartz tube was sealed *in vacuo* and heated in an oven for 2h at 160°C. The solvent was removed and the residue was chromatographed on silica gel with 40% AcOEt in hexane. It was impossible to separate both compounds **35** and **36** at that stage, their relative population was evaluated by integration of the NMR signal corresponding to the alkene (1:1).

The mixture of the two tricycles was then treated with *para*-toluenesulfonic acid (catalytic) in toluene (3 mL) at reflux for 5h. The final mixture still contained both compounds but with a different **36/35** ratio of 3:1 and with no significant total weight loss.

In a separate experiment a solution of 1M  $\text{SnCl}_4$  (7.6  $\mu\text{L}$ ) was added to a solution of the macrocycle **3** (1.6 mg, 3.6  $\mu\text{L}$ ) in dichloromethane (1 mL) at 30°C. The solution was stirred at 30°C for 3.5 h and quenched with sat.  $\text{NaHCO}_3$  (1 mL). The mixture was extracted with dichloromethane (3 x 5mL) and dried. Pure tricycle **35** was obtained after purification on silica gel with 40% AcOEt in hexane. (1.5 mg, 94%). Since the conditions had been sufficiently mild to avoid epimerization, **35** could be crystallized from pentane and ether and its structure proven crystal X-ray diffraction analysis.

Finally, pure tricycle **35** was treated with *para*-toluenesulfonic acid (catalytic) in toluene (3 mL) at reflux for 5h. The solvent was removed and the residue was chromatographed on silica gel with 40% AcOEt in hexane. A 3:1 mixture of compounds **36** and **35** was obtained as previously observed.

CST tricycle **35**:  $^1\text{H}$  NMR (300 MHz,  $\text{CDCl}_3$ ,  $\delta$  ppm) : 5.45 (2H, s,  $\text{CH}=\text{CH}$ ) ; 3.76 (3H, s,  $\text{OCH}_3$ ) ; 3.75 (3H, s,  $\text{OCH}_3$ ) ; 3.69 (3H, s,  $\text{OCH}_3$ ) ; 3.67 (3H, s,  $\text{OCH}_3$ ) ; 3.05 (1H, dd,  $J=15\text{Hz}$ , 2.5Hz,  $\text{COCH}$ ) ; 2.60-1.95 (9H, m,  $\text{CH}$ ) ; 1.70-1.30 (4H, m,  $\text{CH}$ ).

IR (film,  $\nu$   $\text{cm}^{-1}$ ) : 2922, 1734, 1437, 1257. SM (M) $^+$  : 436. HRMS calcd: 436.1733 (M) $^+$ ; found: 436.1730. mp : 153-155°C

CAC tricycle **36**: Only a few  $^1\text{H}$  NMR signals could be attributed for this compound which could not be separated from its epimer **35**:  $^1\text{H}$  NMR (300 MHz,  $\text{CDCl}_3$ ,  $\delta$  ppm): 5.66 (1H, complex AB system appearing as a doublet of doublet,  $J_{AB}=9\text{Hz}$ ,  $J=4\text{Hz}$ ,  $\text{CH}=\text{CH}$ ); 5.56 (1H, complex AB system appearing as a doublet of doublet,  $J_{AB}=9\text{Hz}$ ,  $J=3.5\text{Hz}$ ,  $\text{CH}=\text{CH}$ ); 3.74 (6H, s,  $\text{OCH}_3$ ); 3.72 (3H, s,  $\text{OCH}_3$ ); 3.68 (3H, s,  $\text{OCH}_3$ ).

ORTEP  
representation  
of **35**

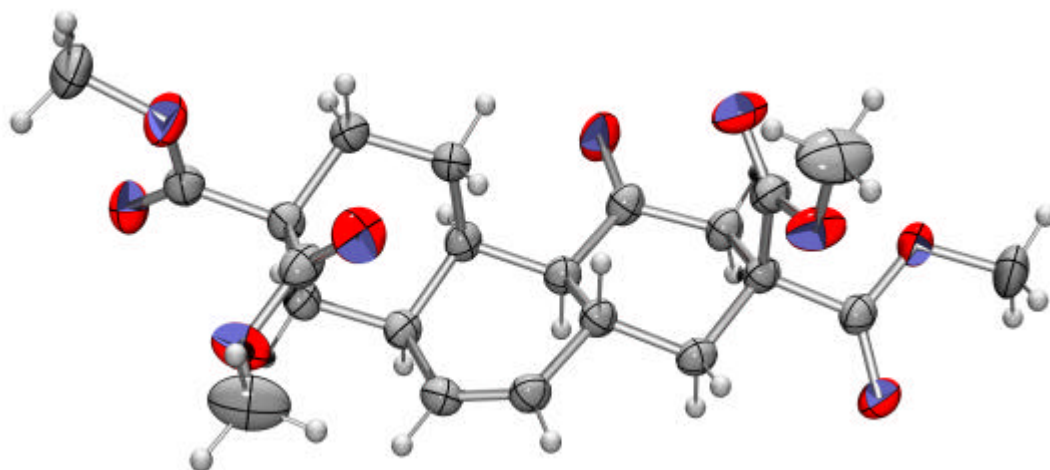

5

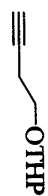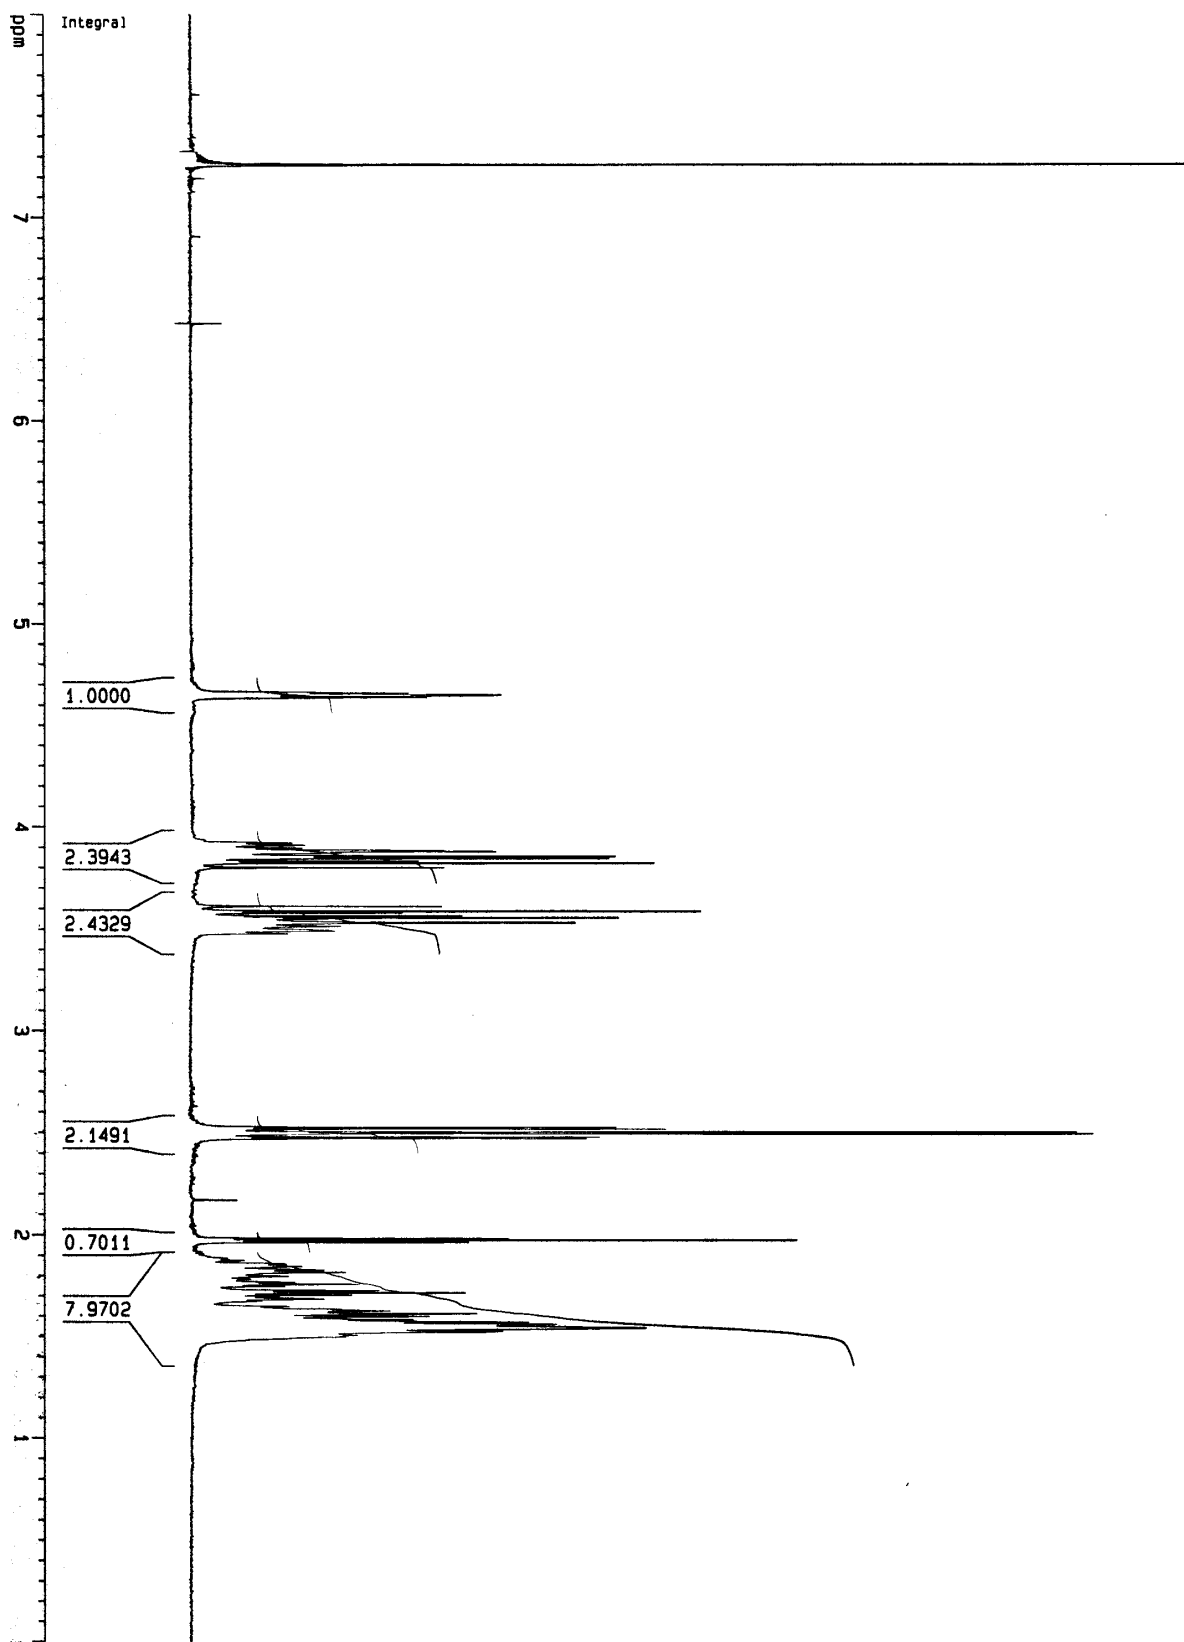

5

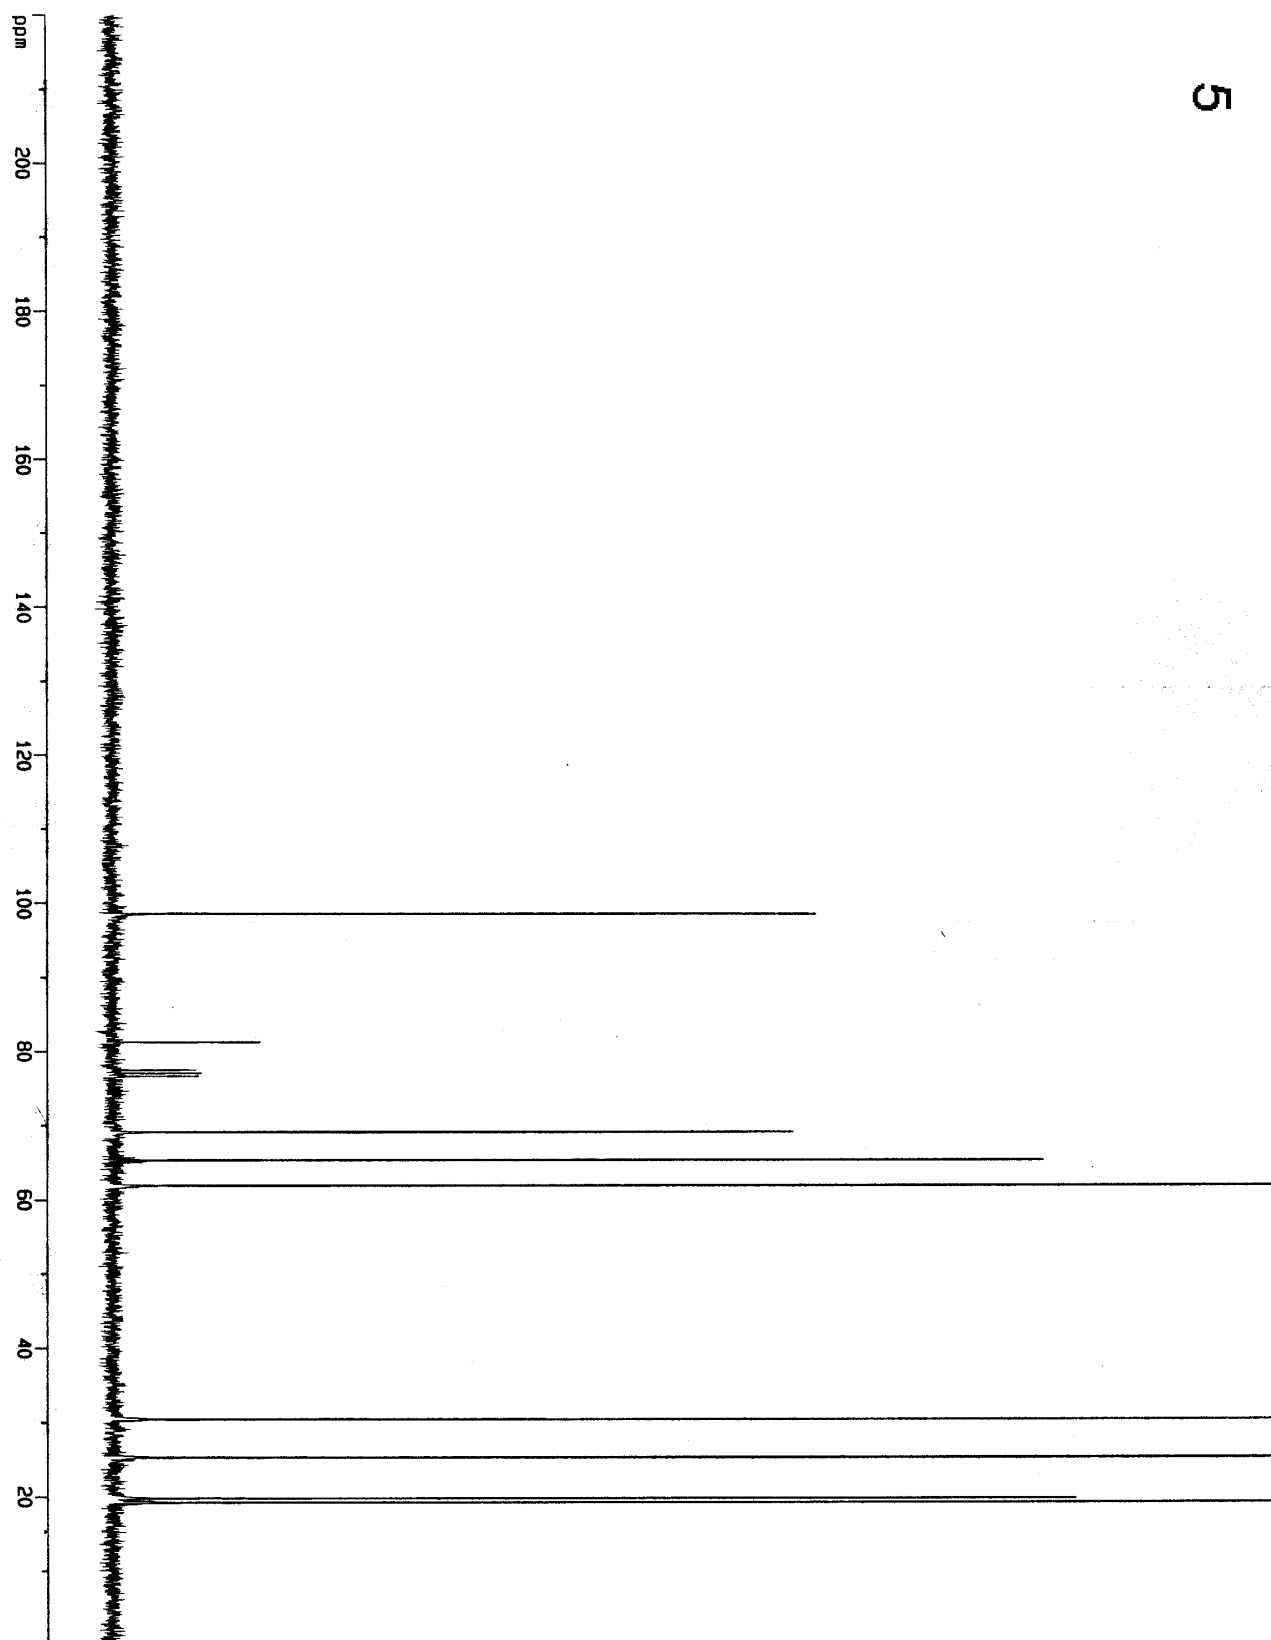

6

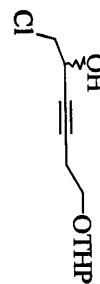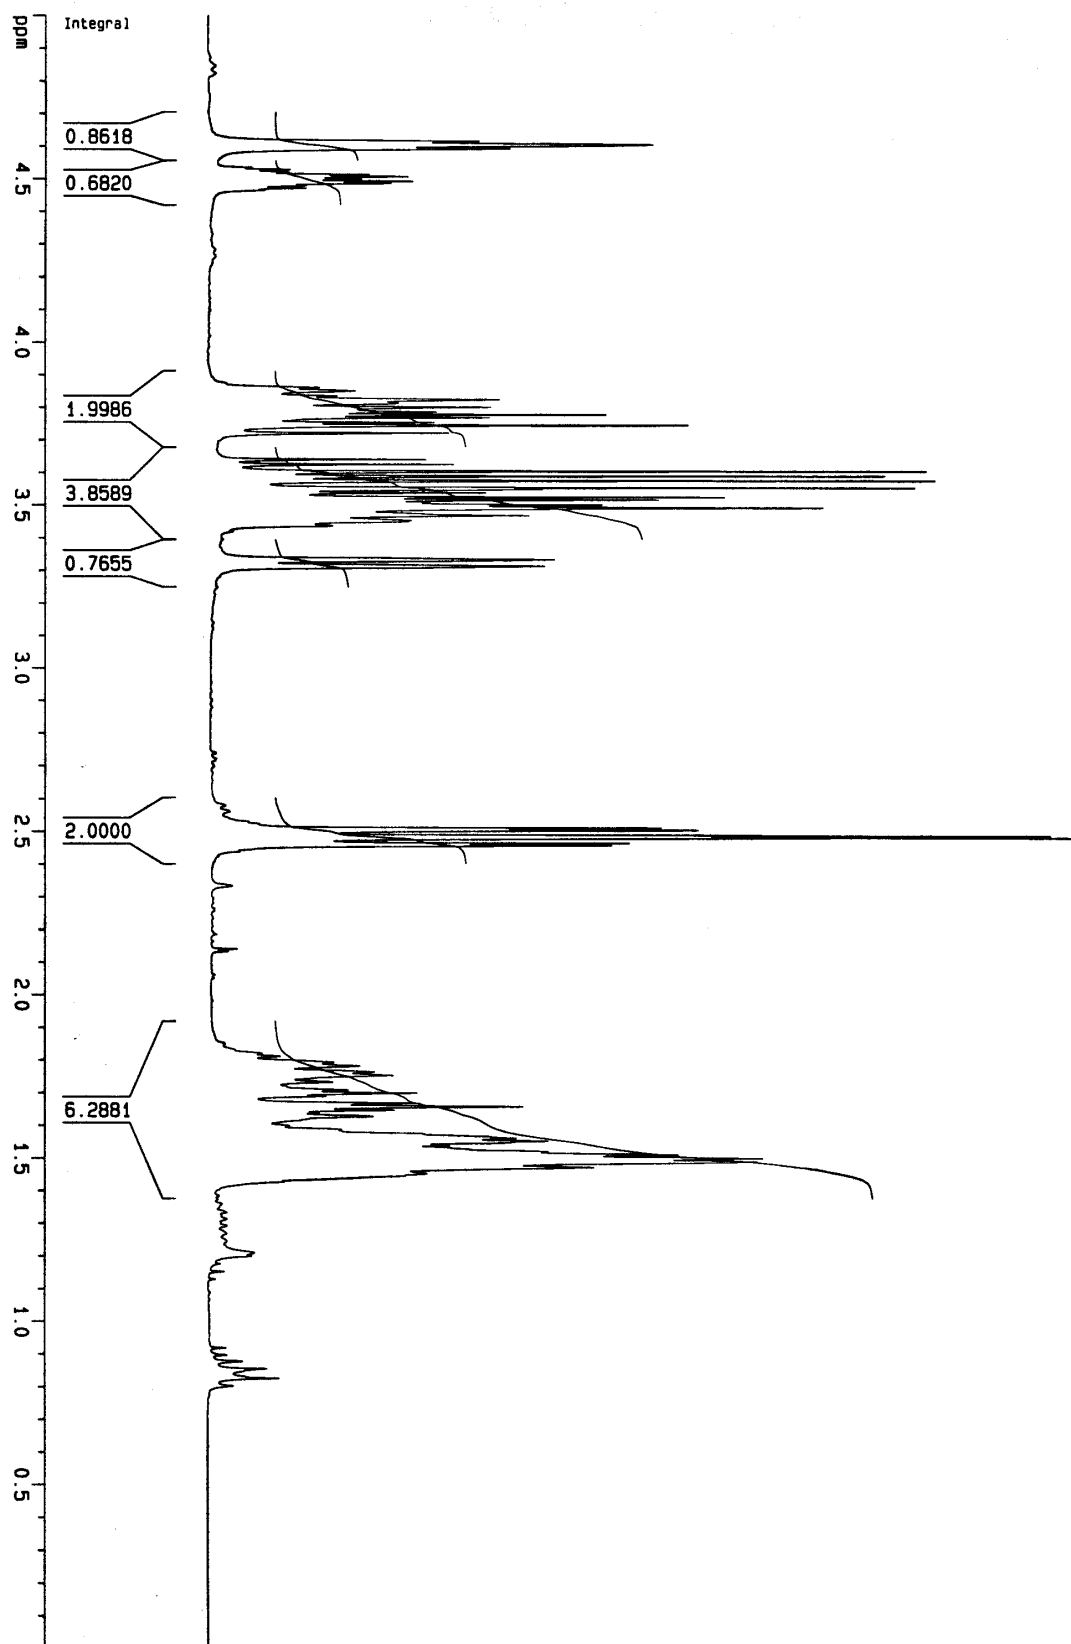

ppm

9

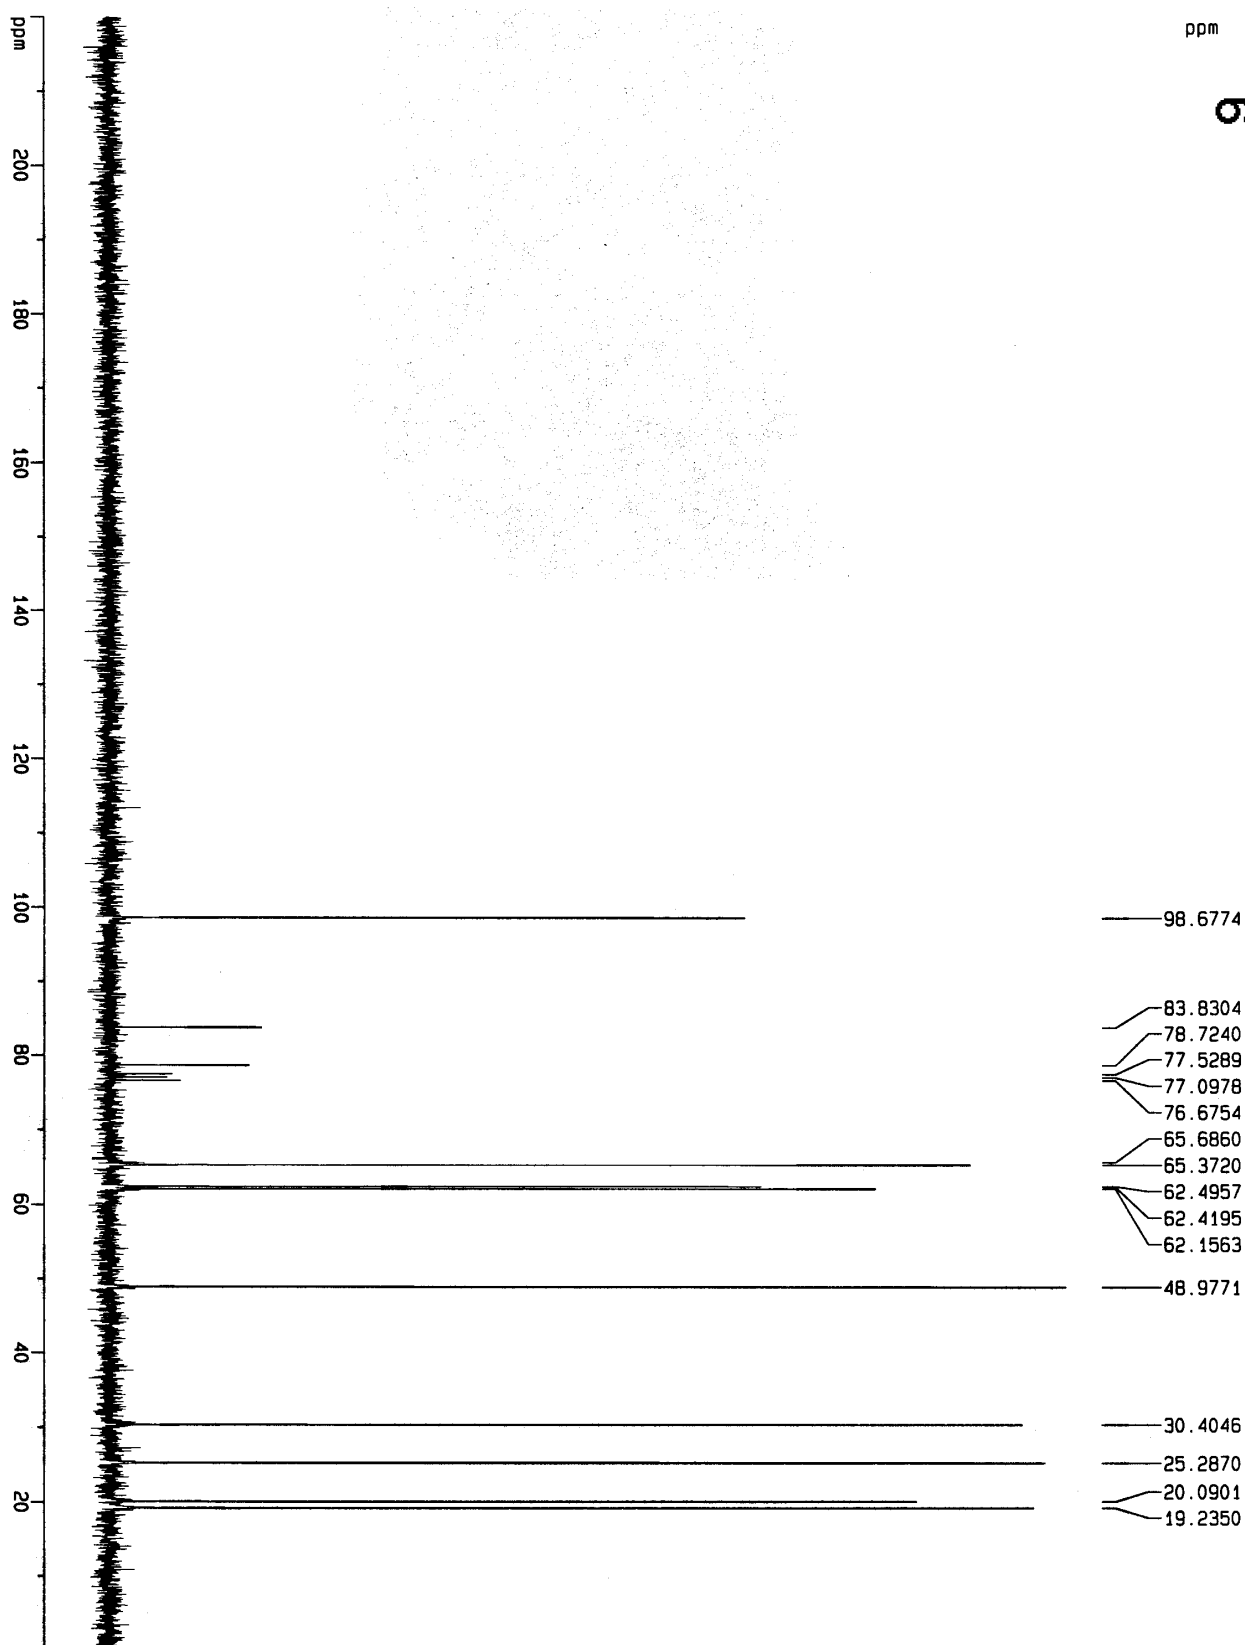

7

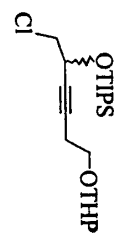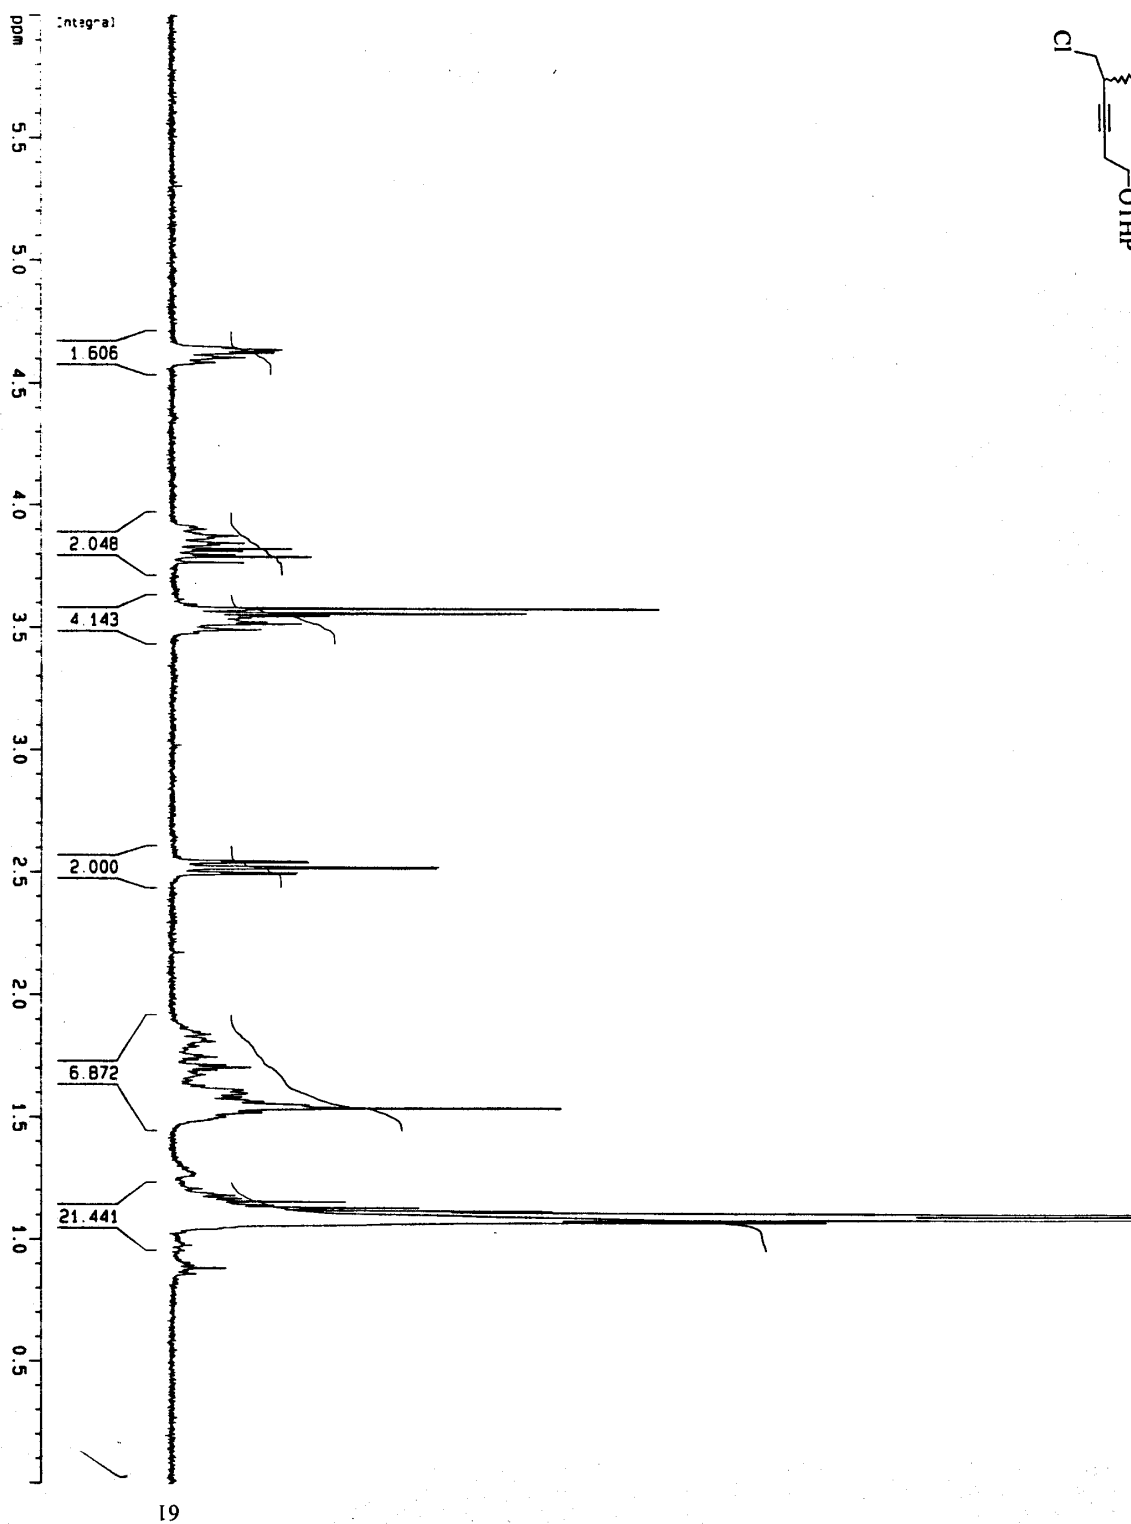

7

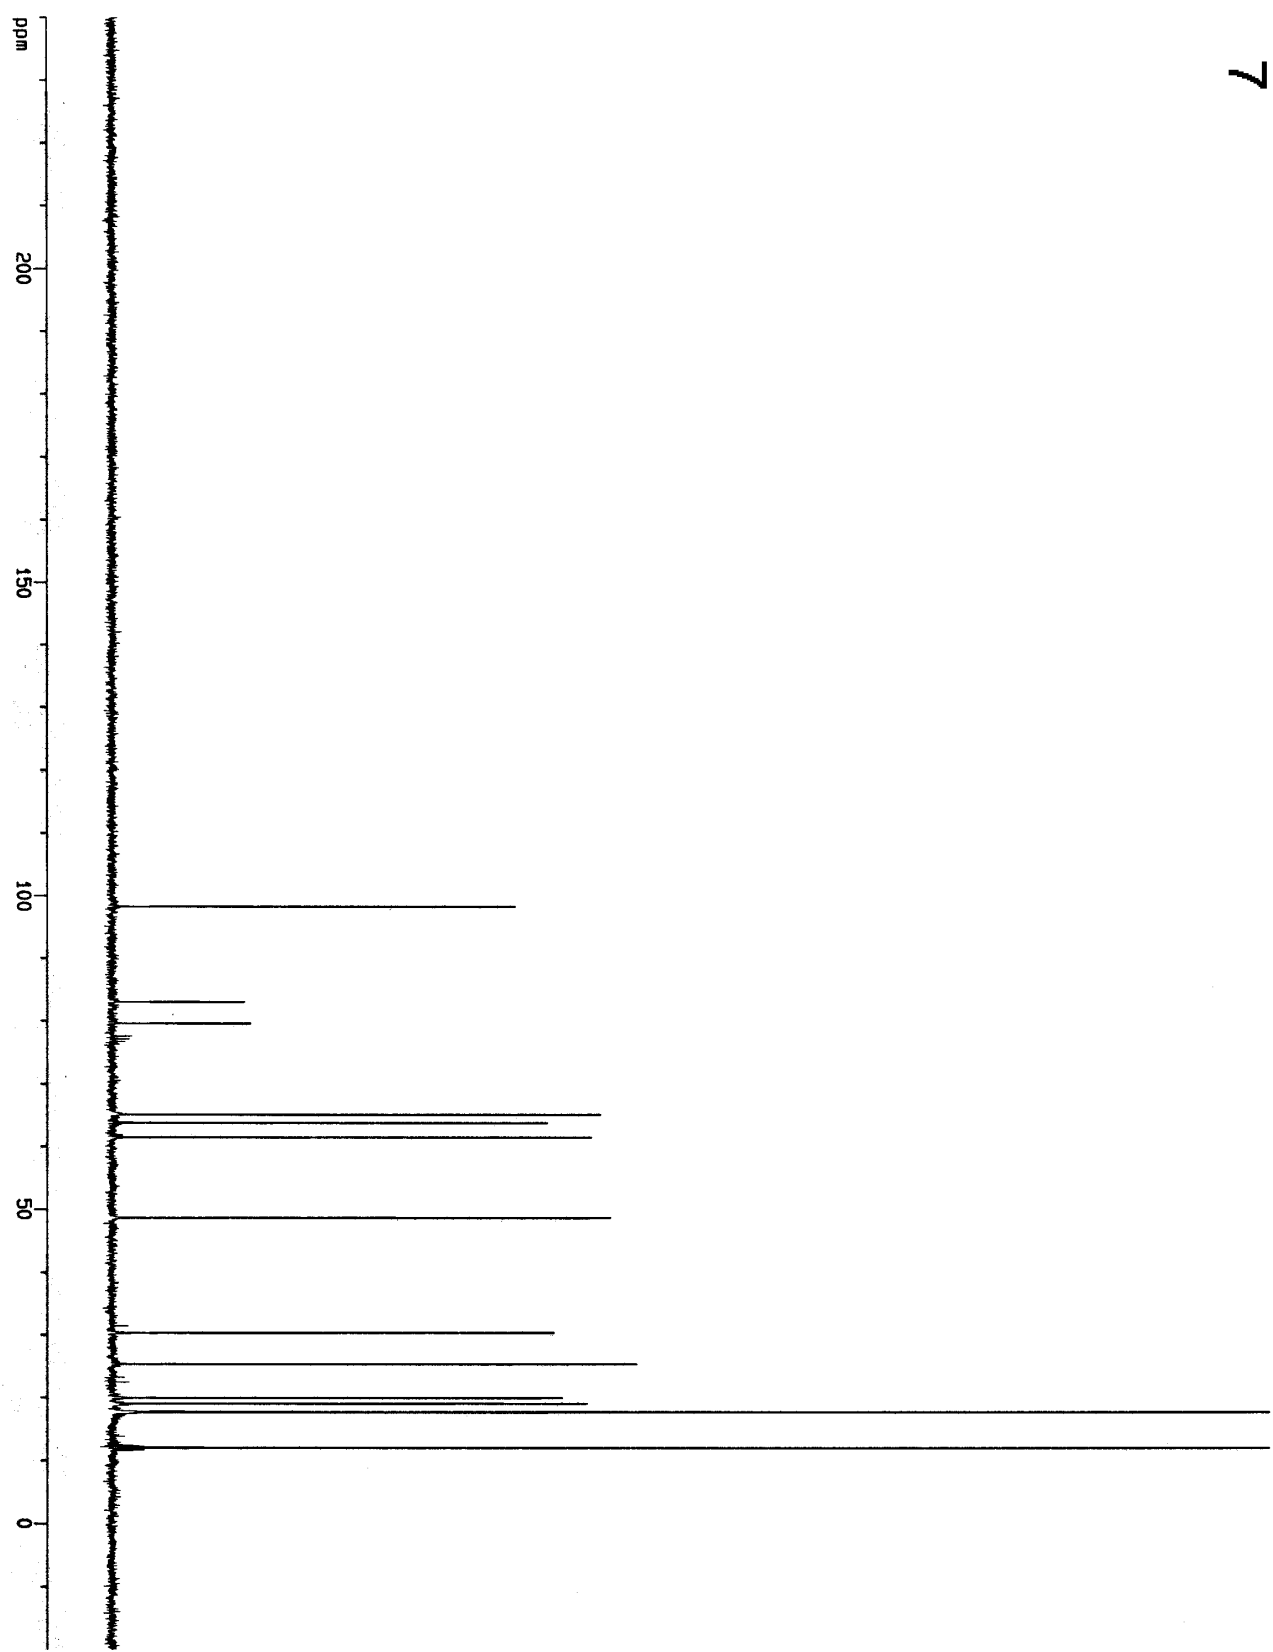



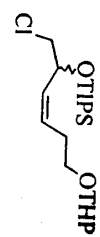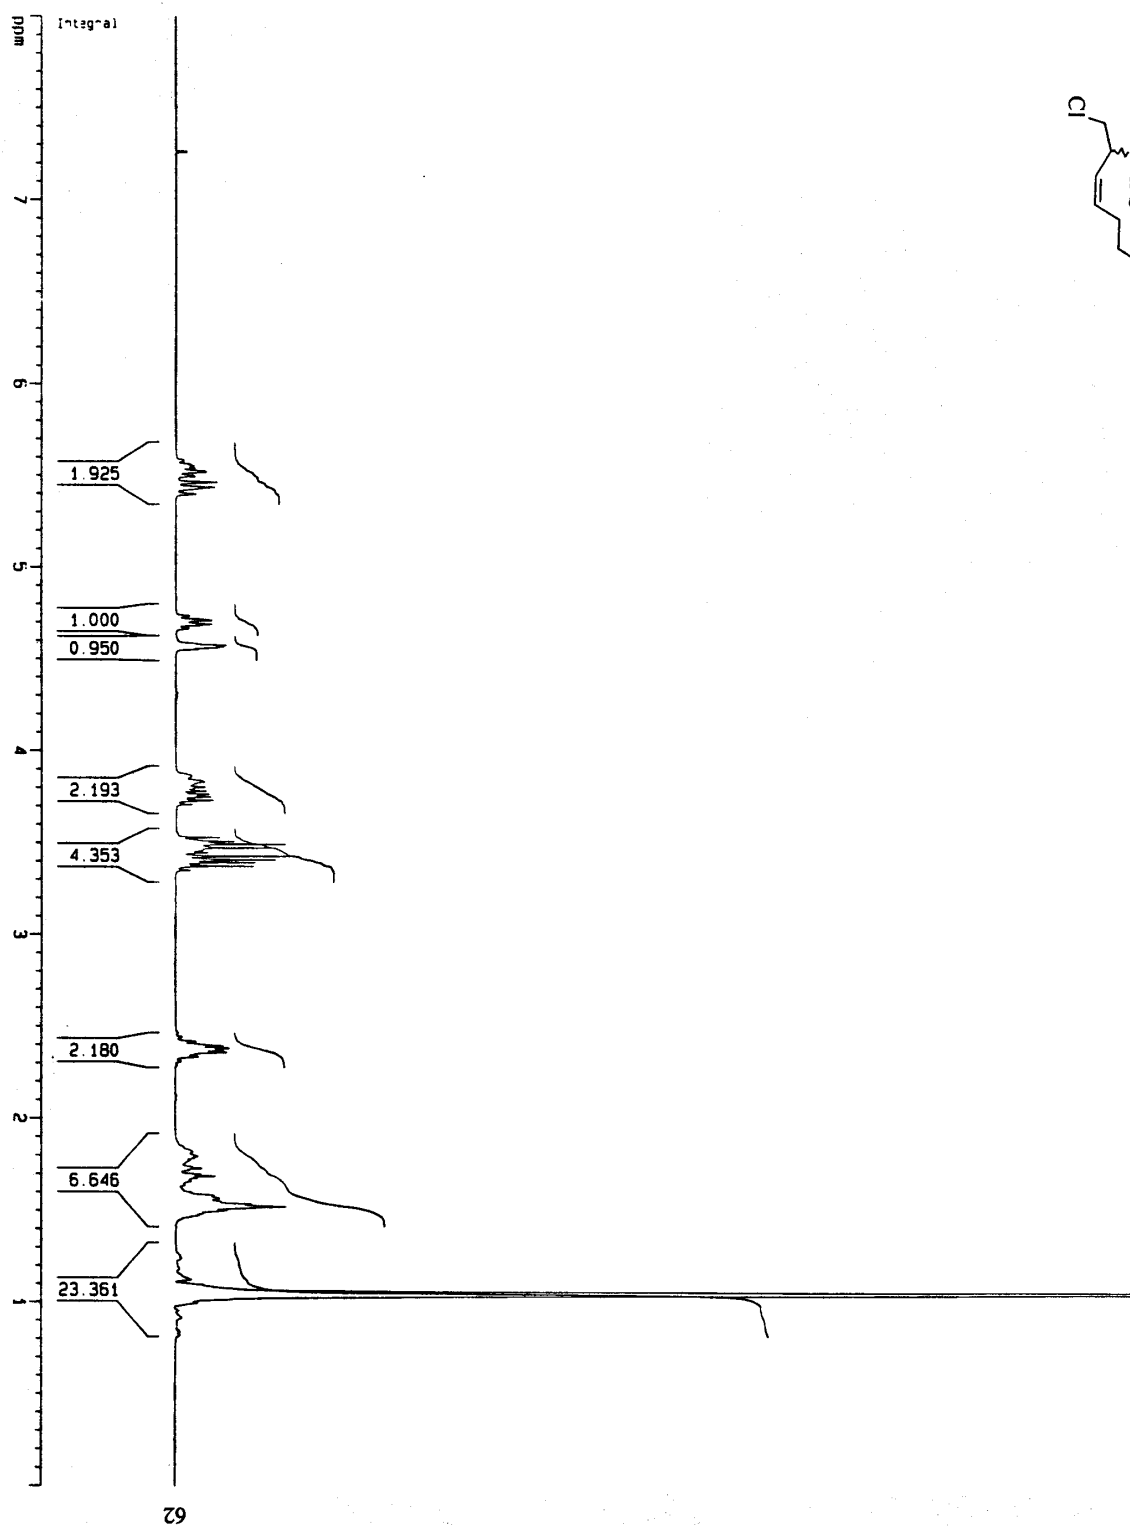

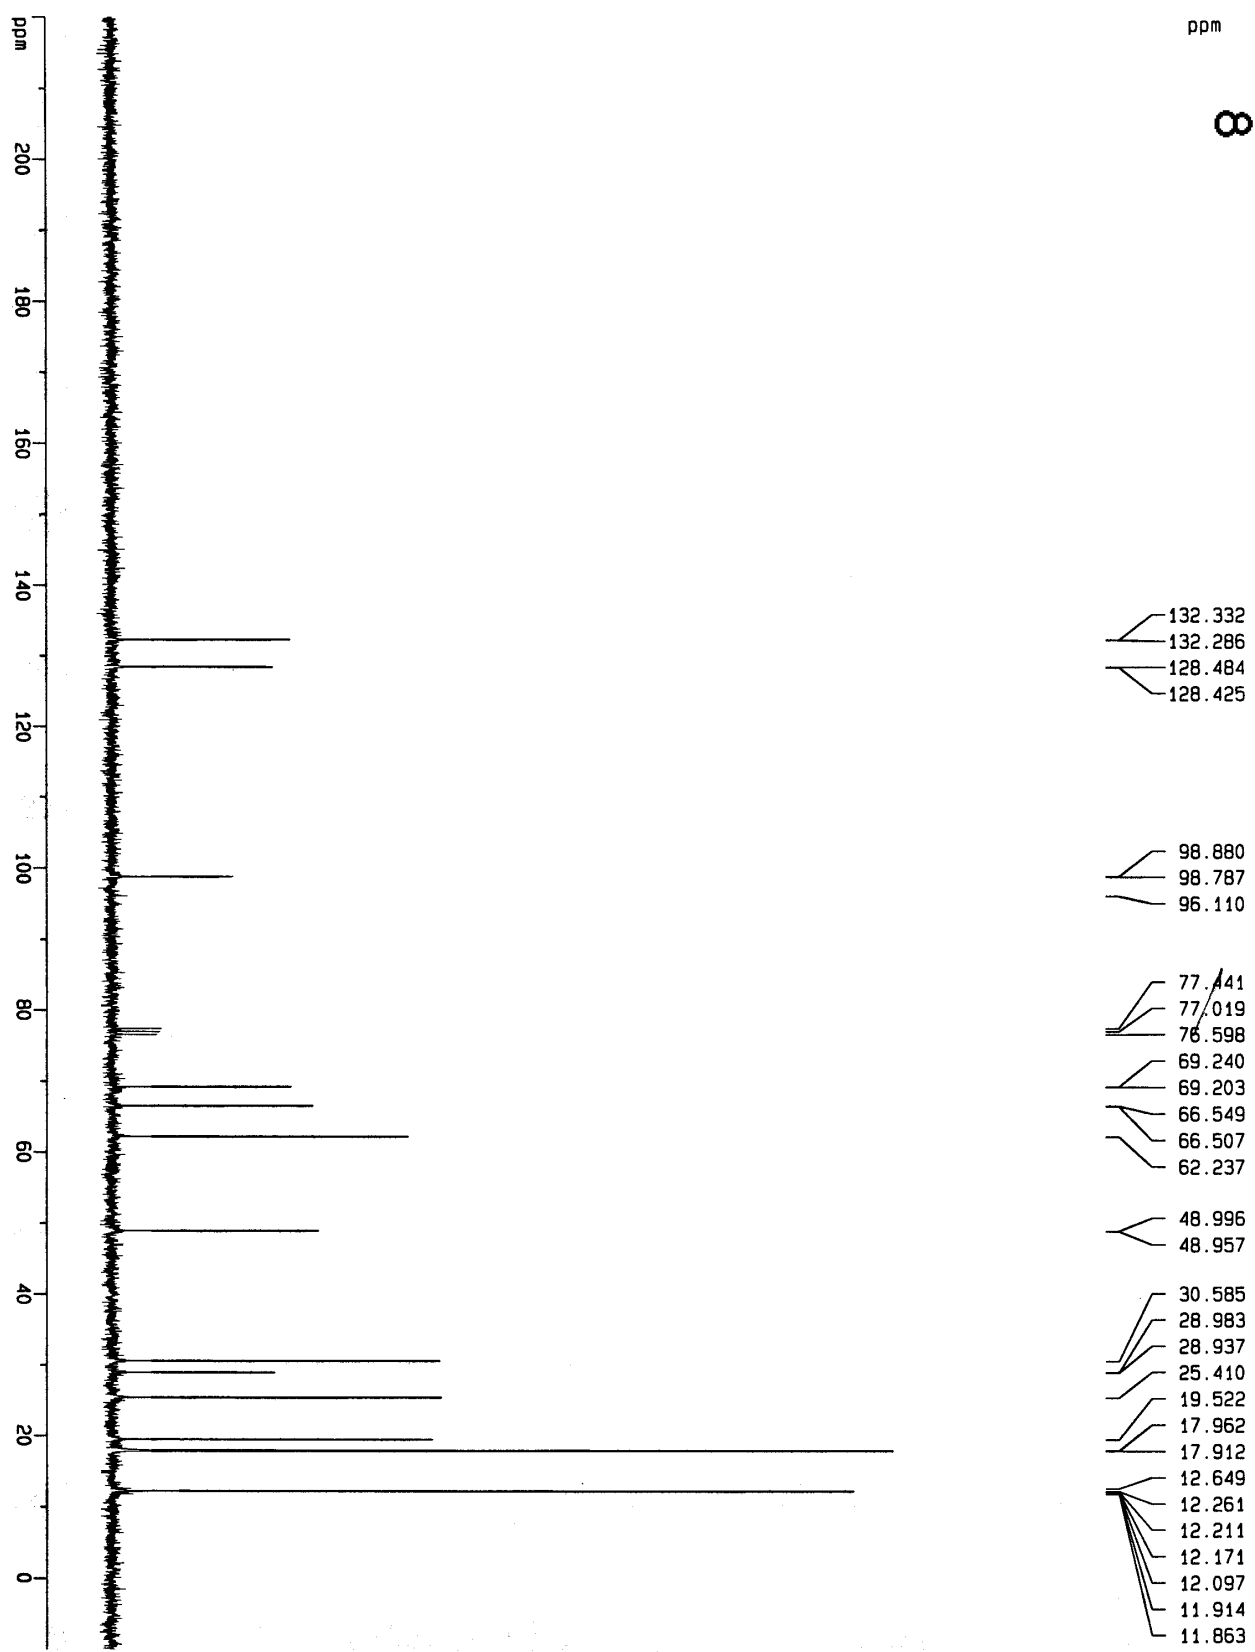

6

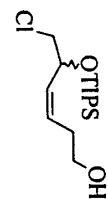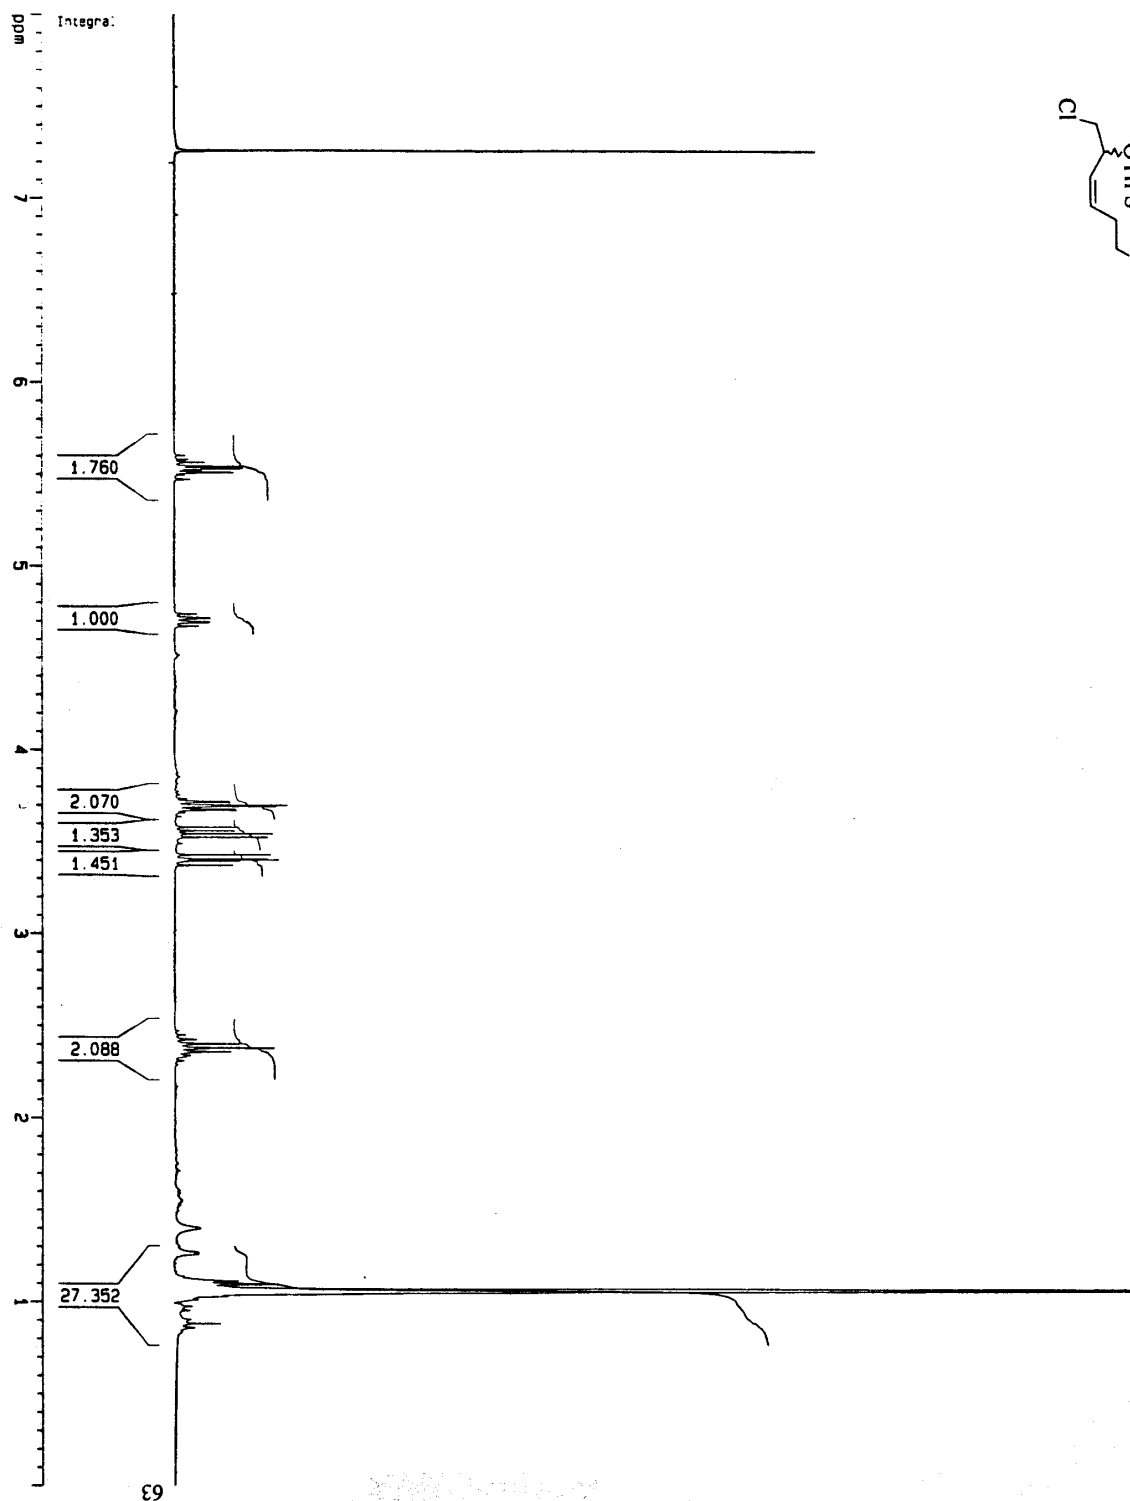

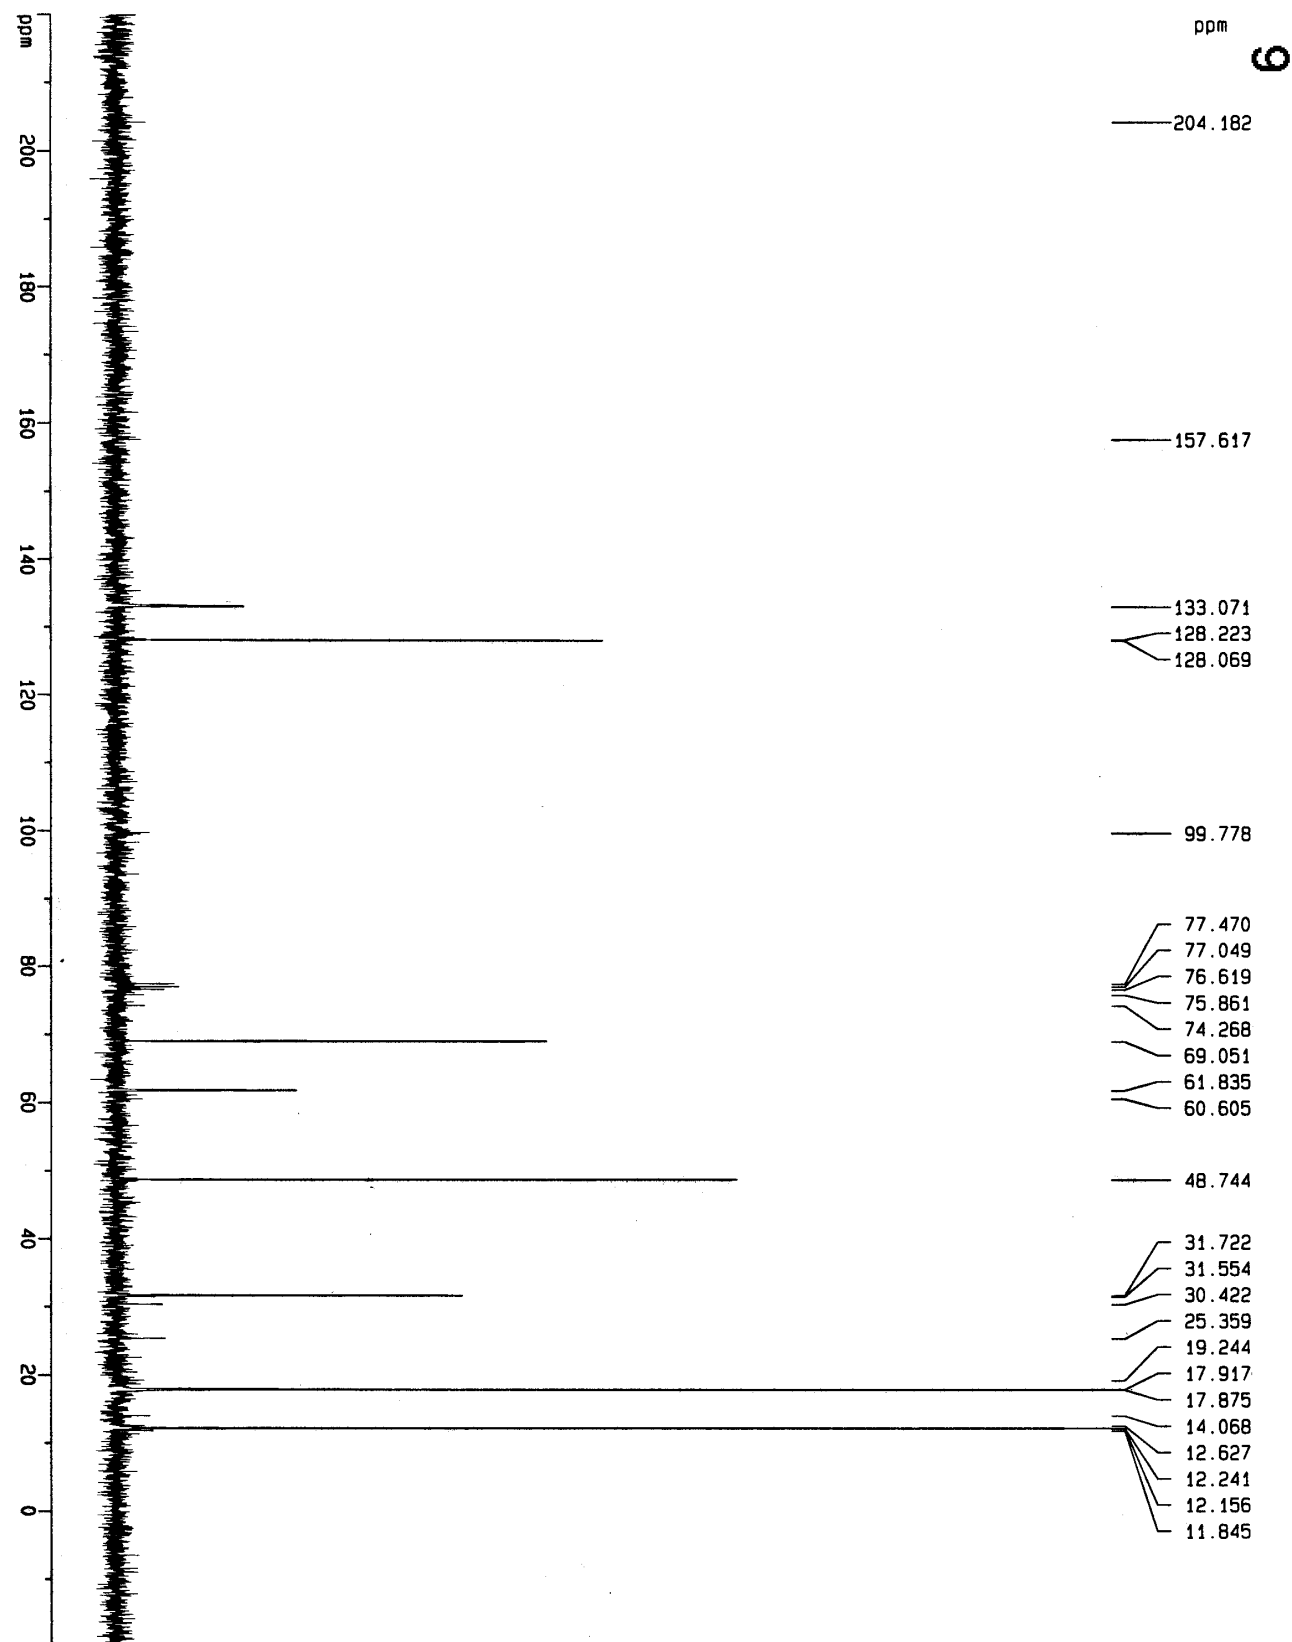

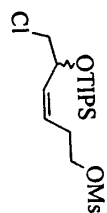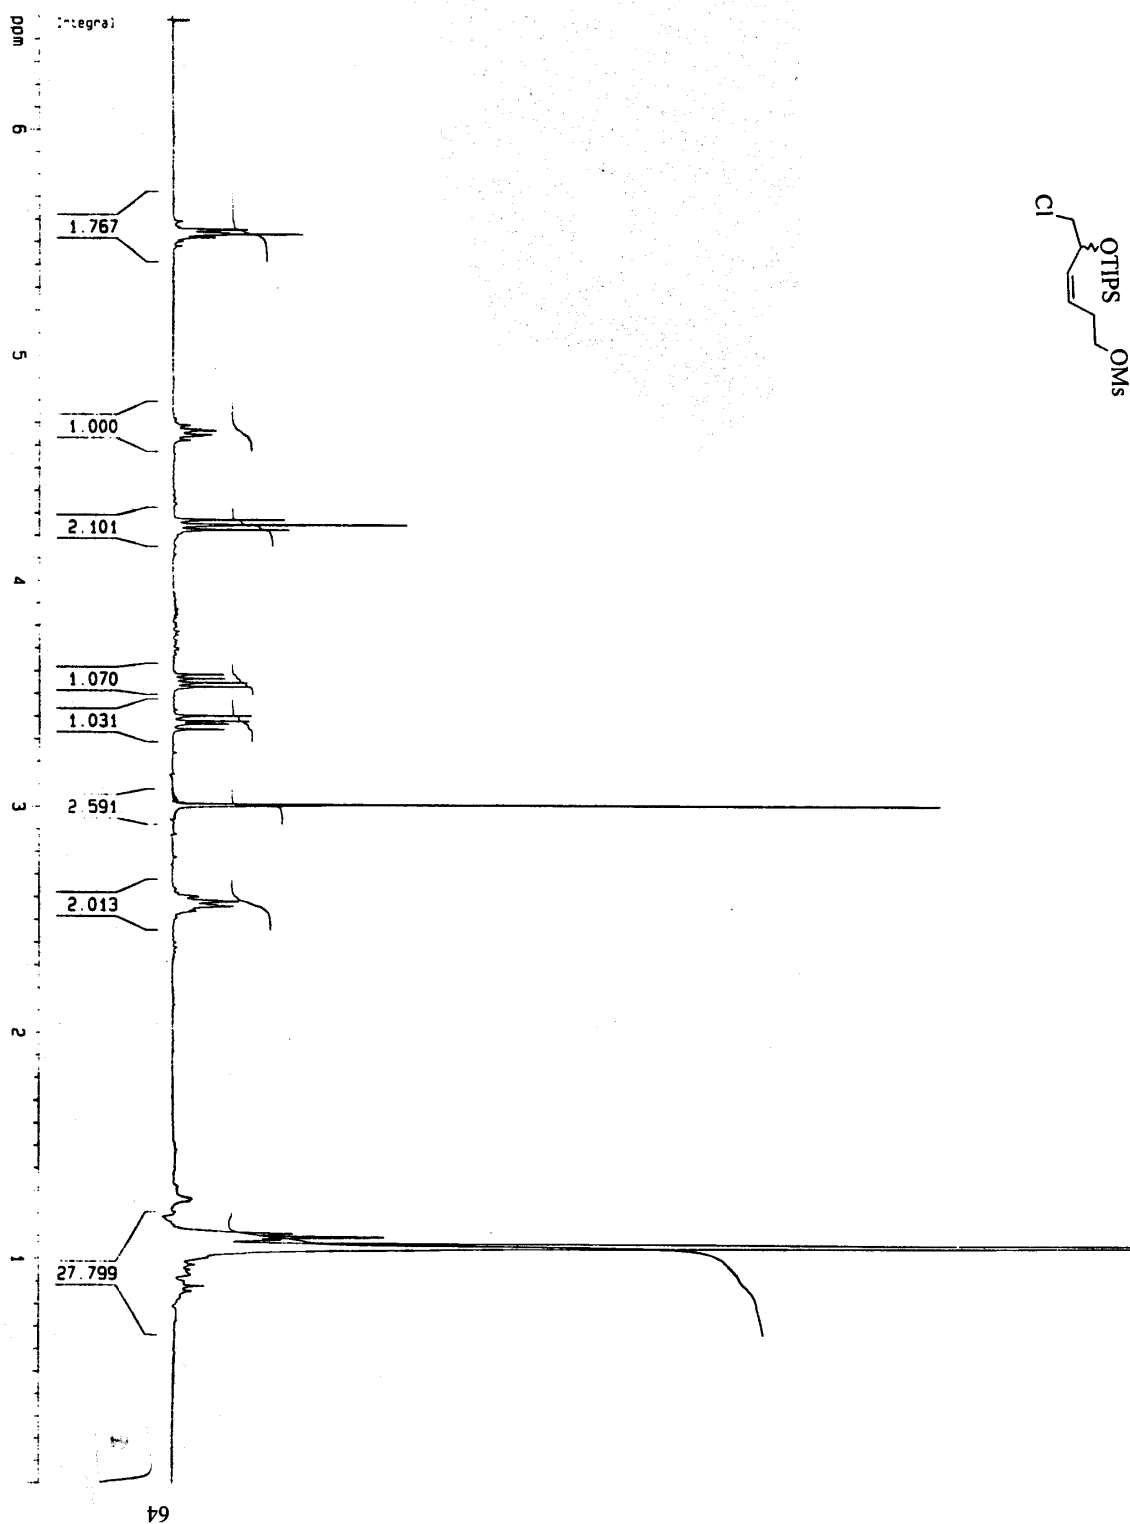

10

ppm

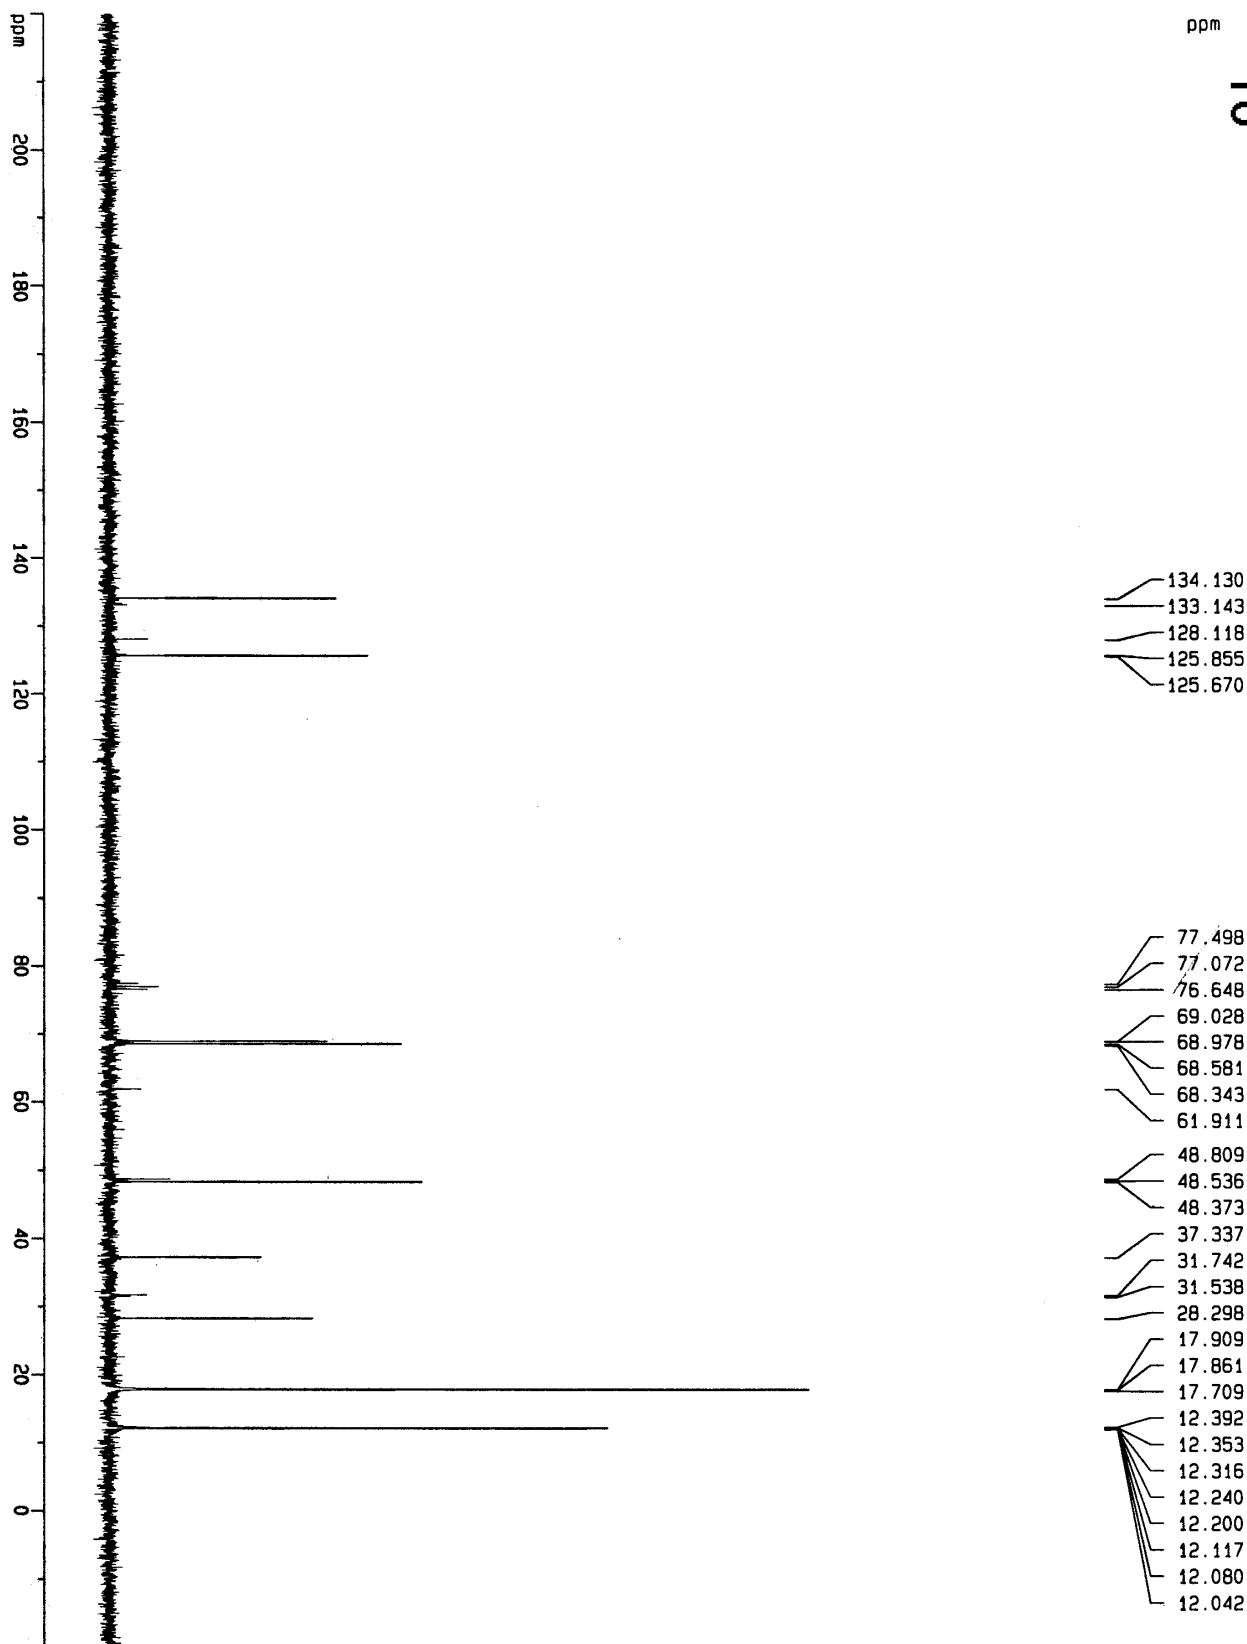

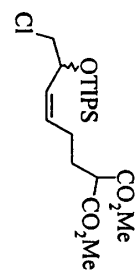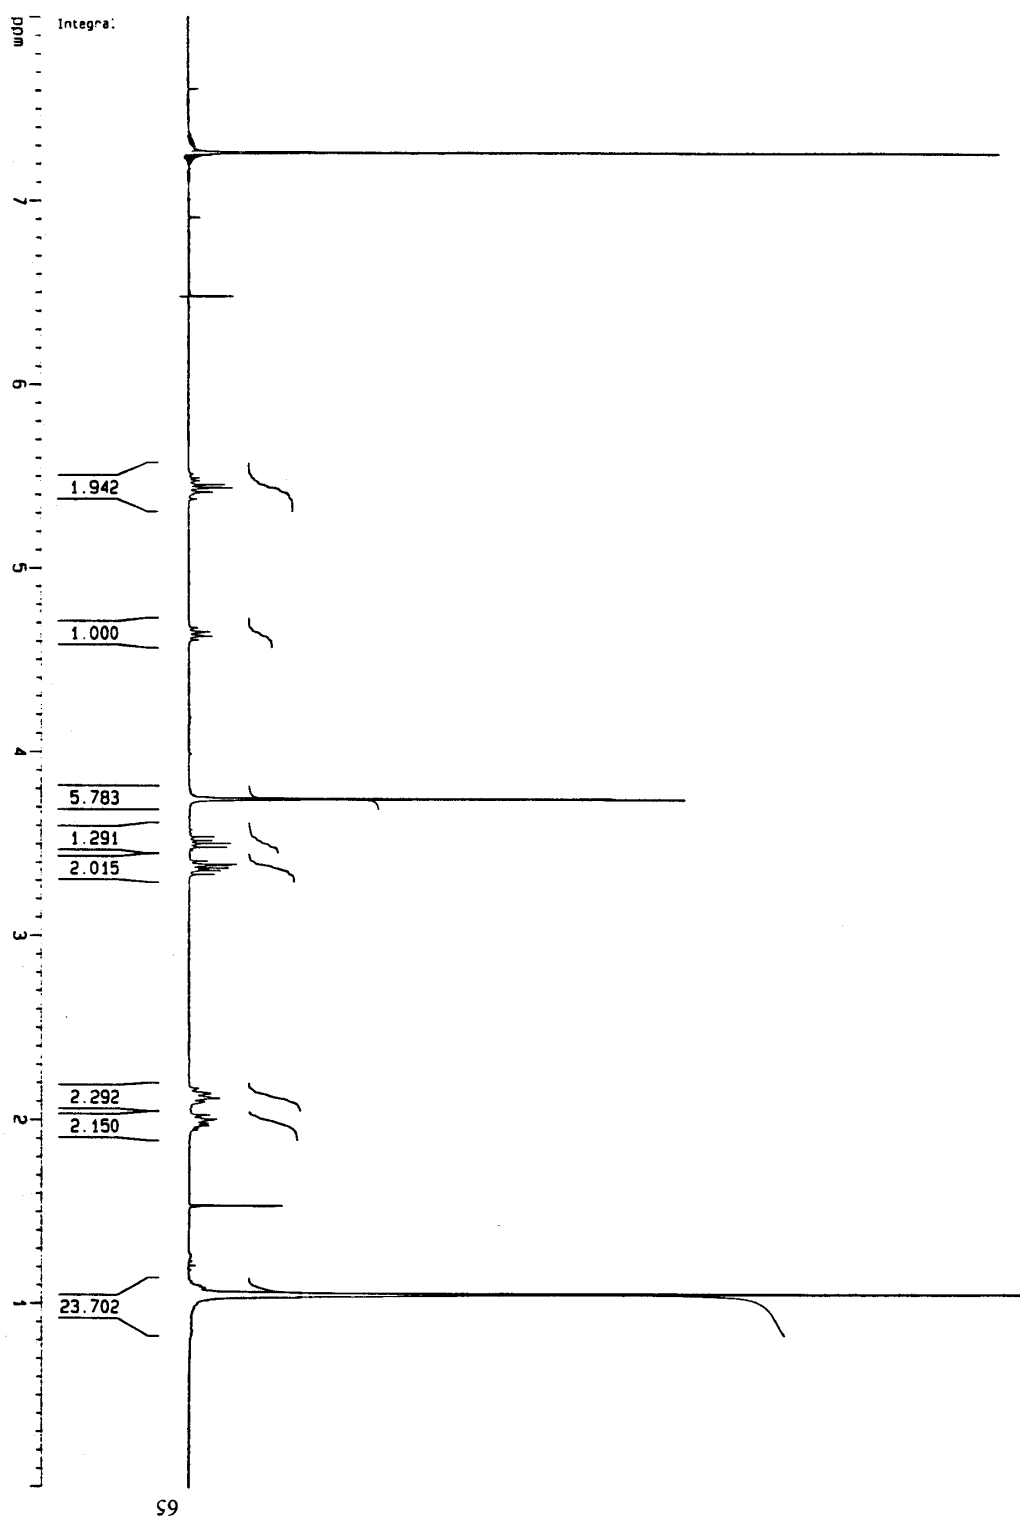

11

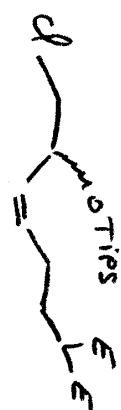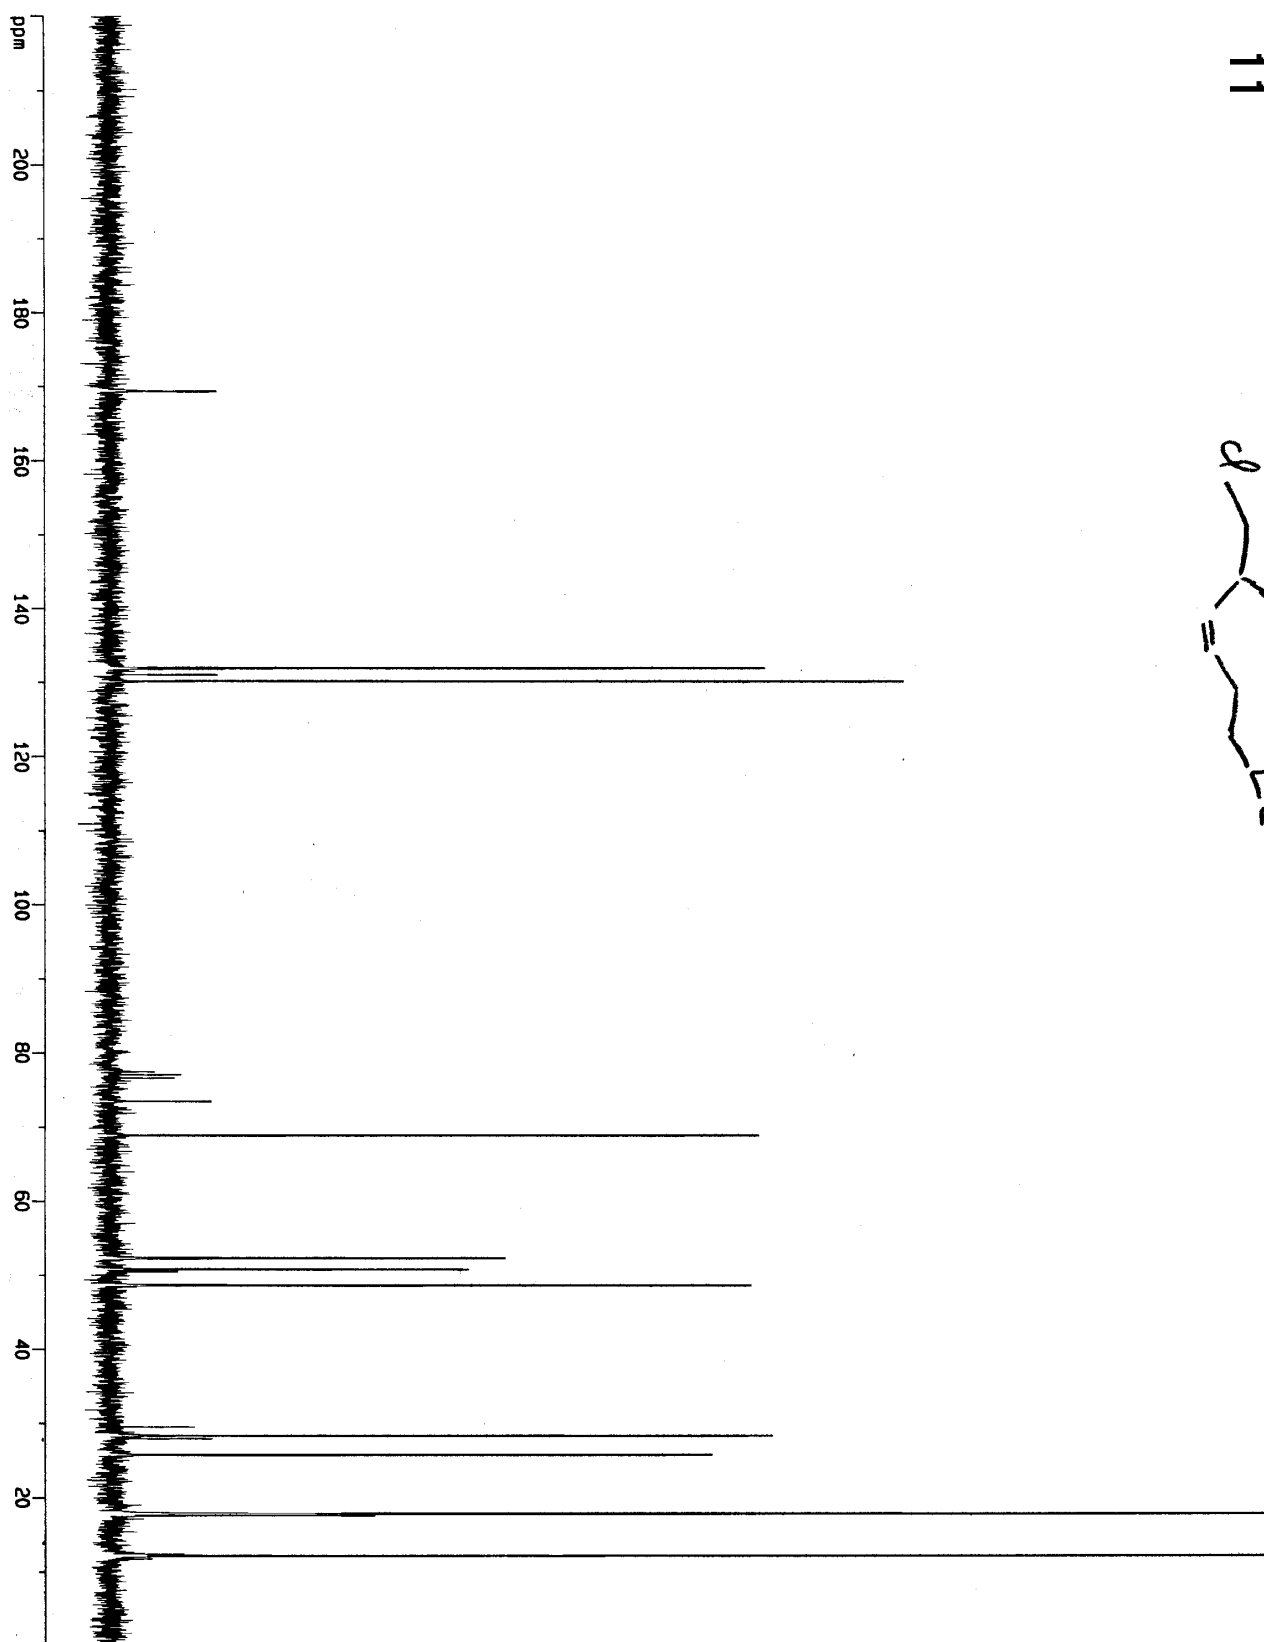



13

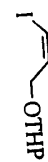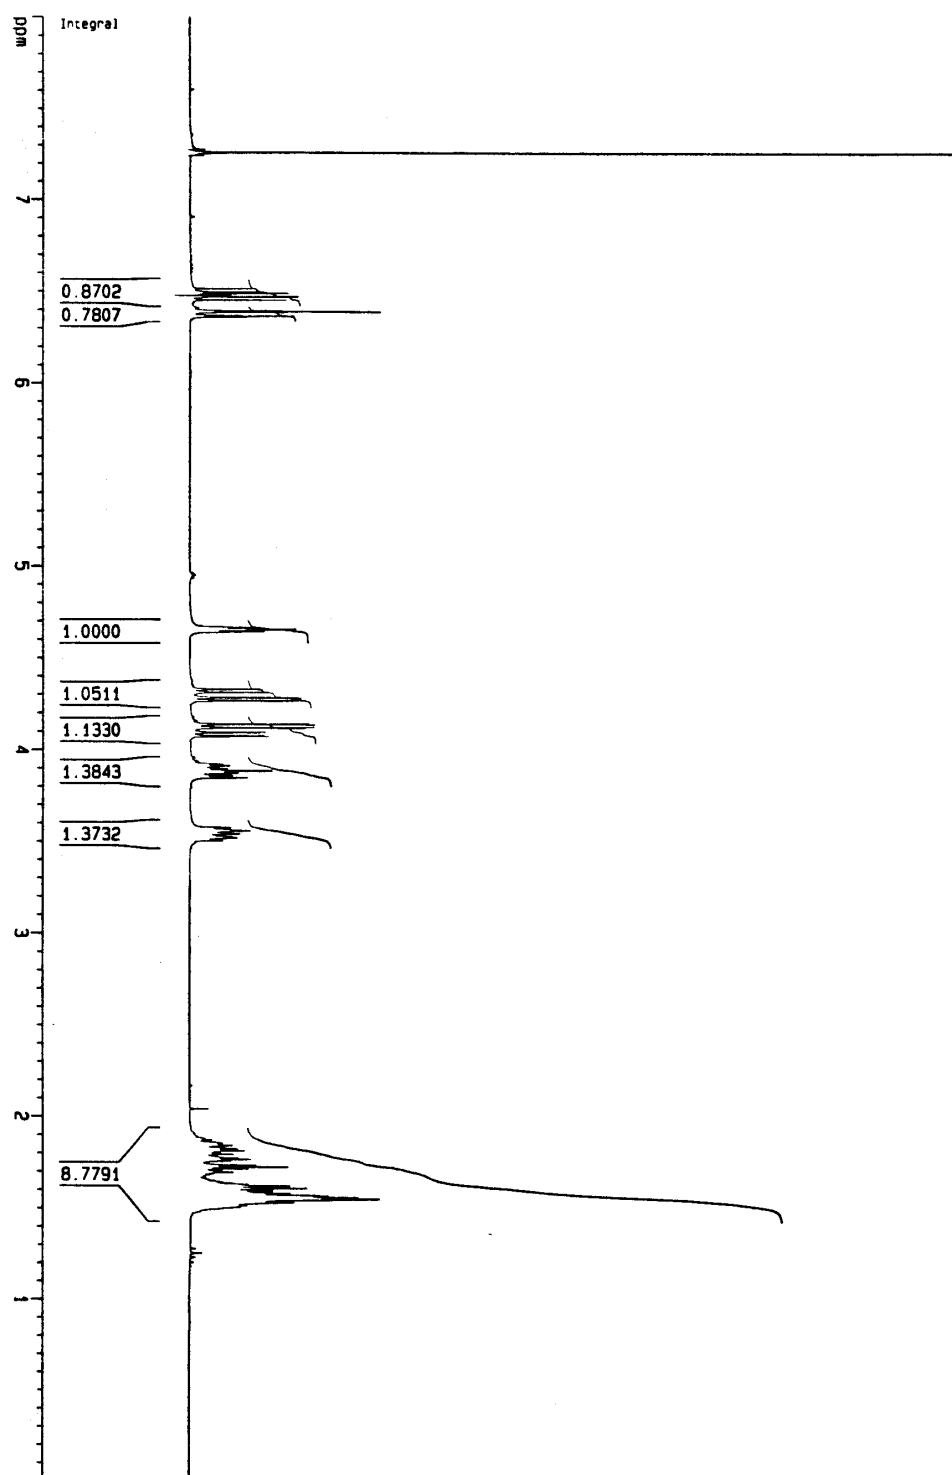

99

ppm

13

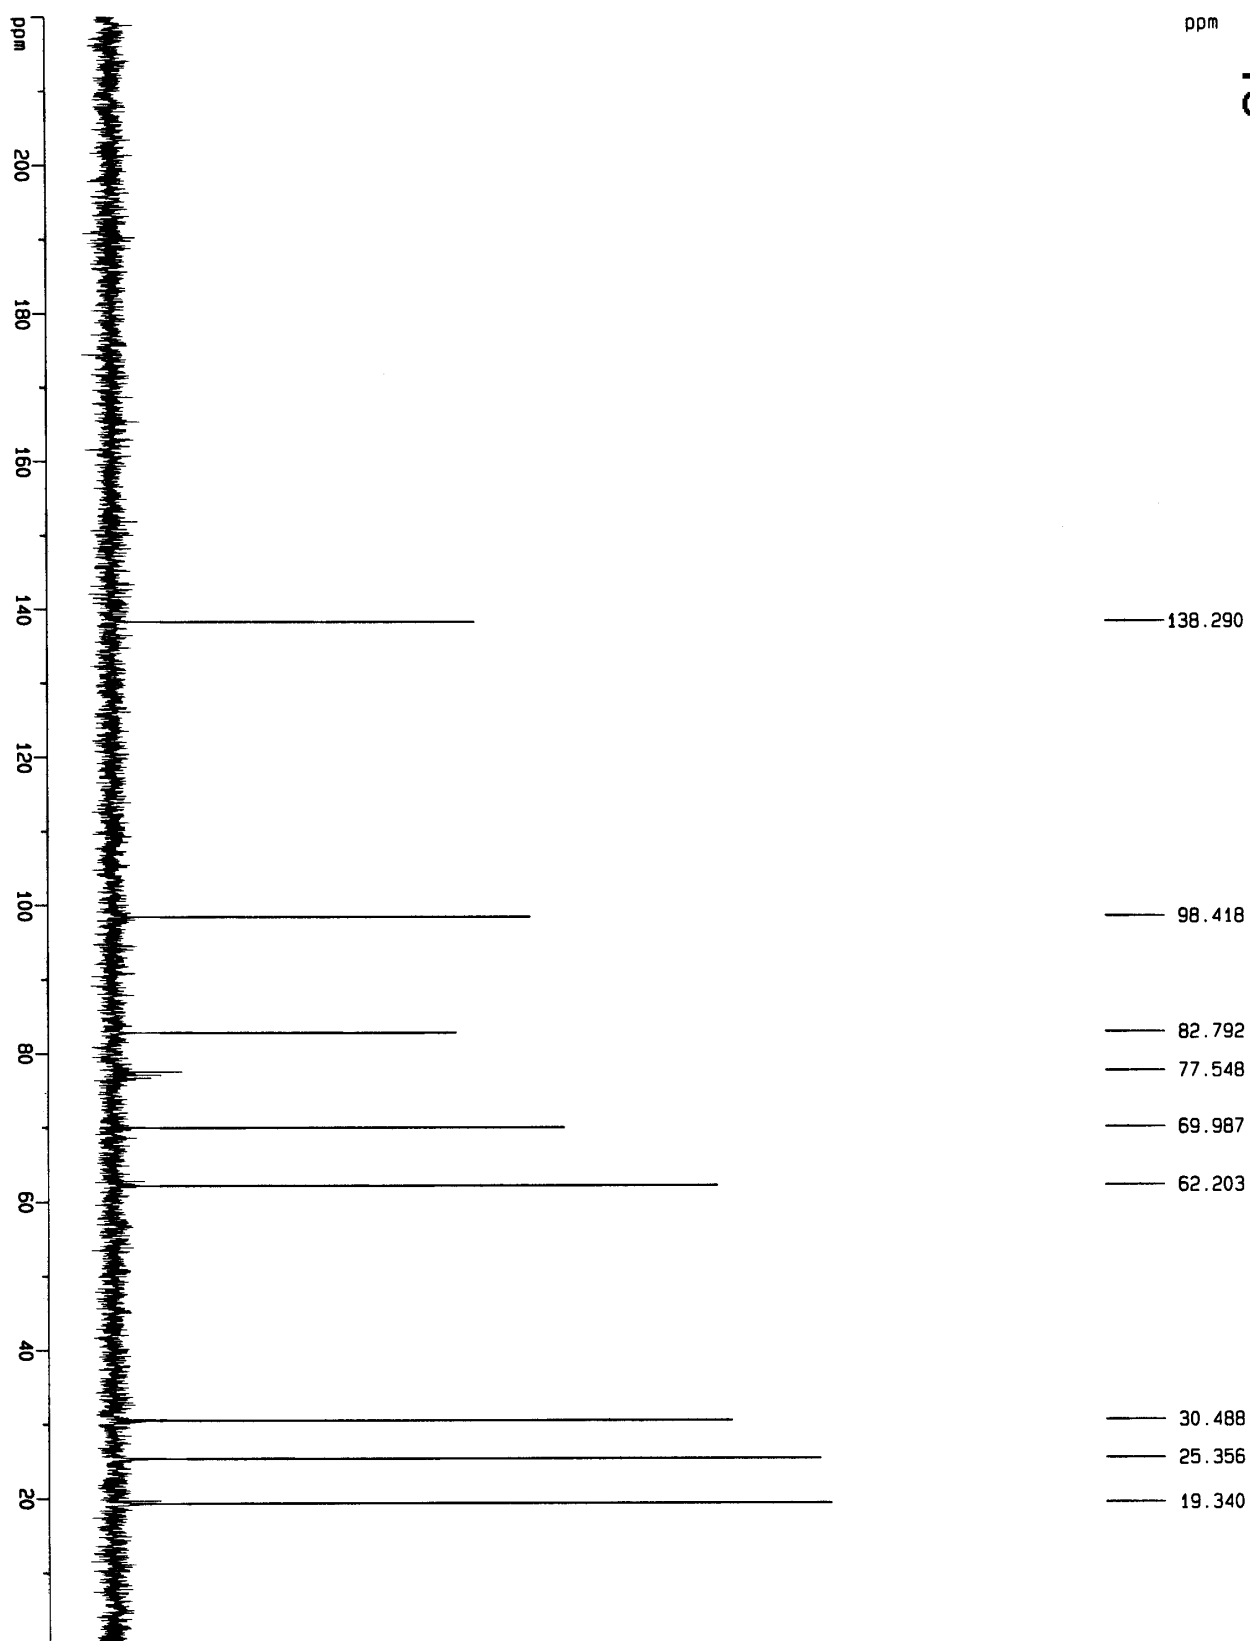

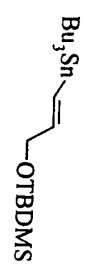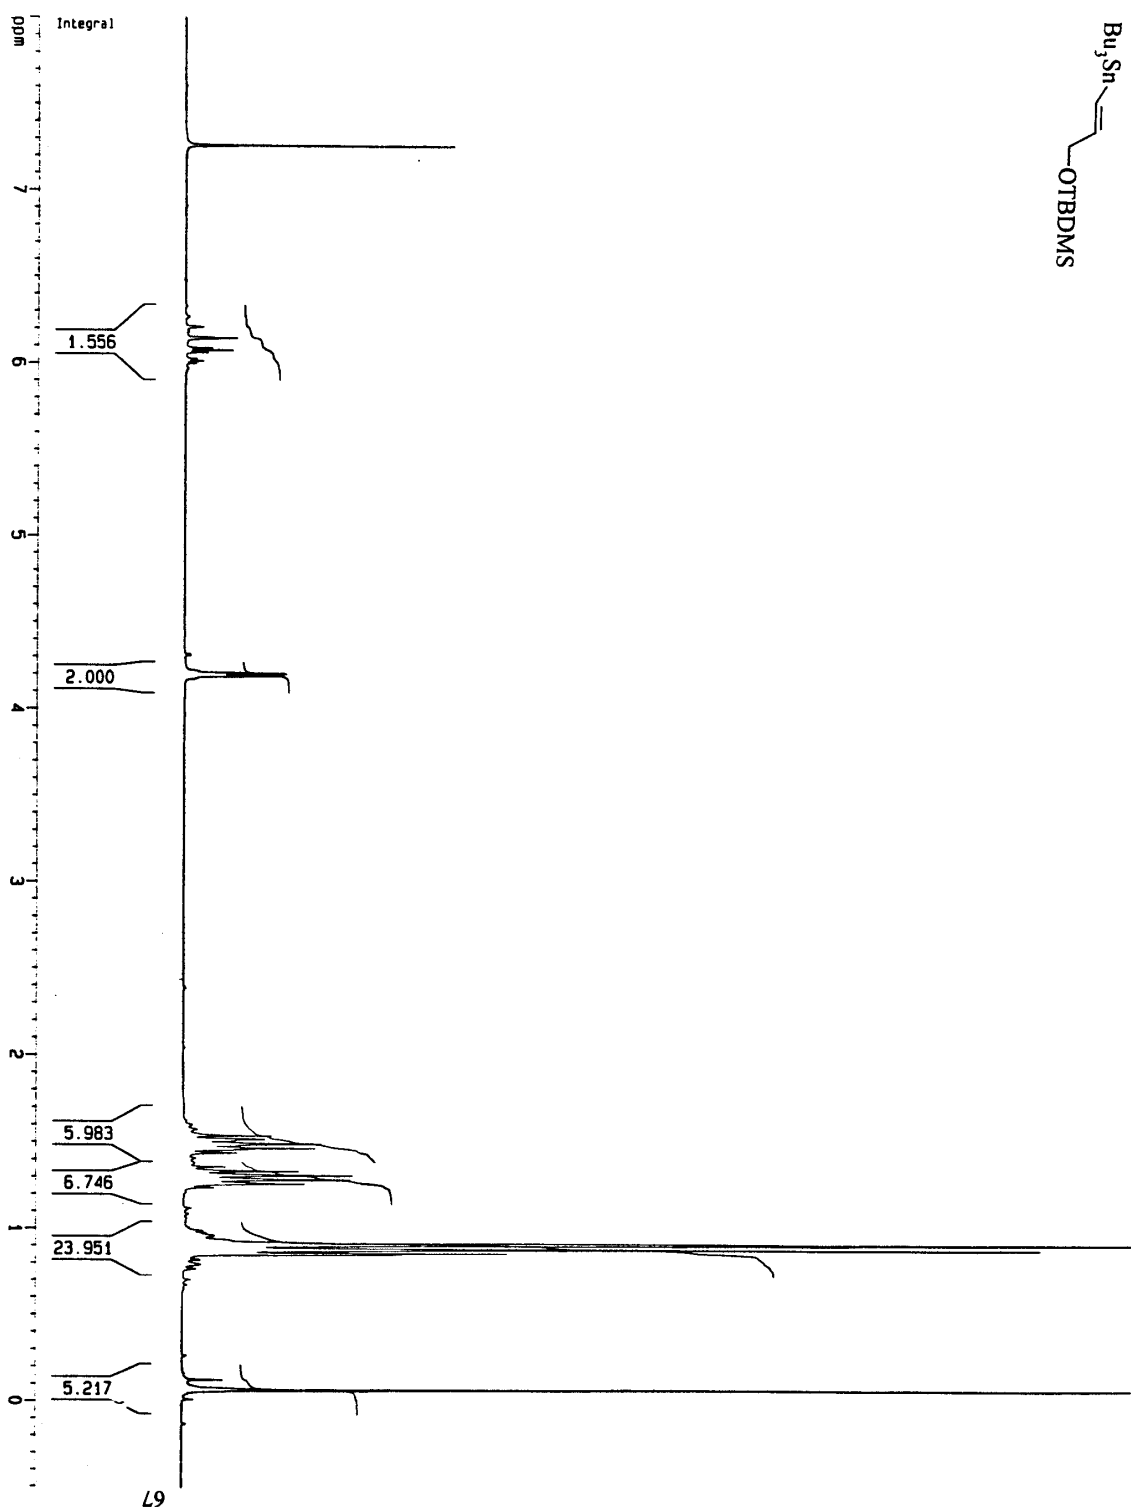

ppm

15

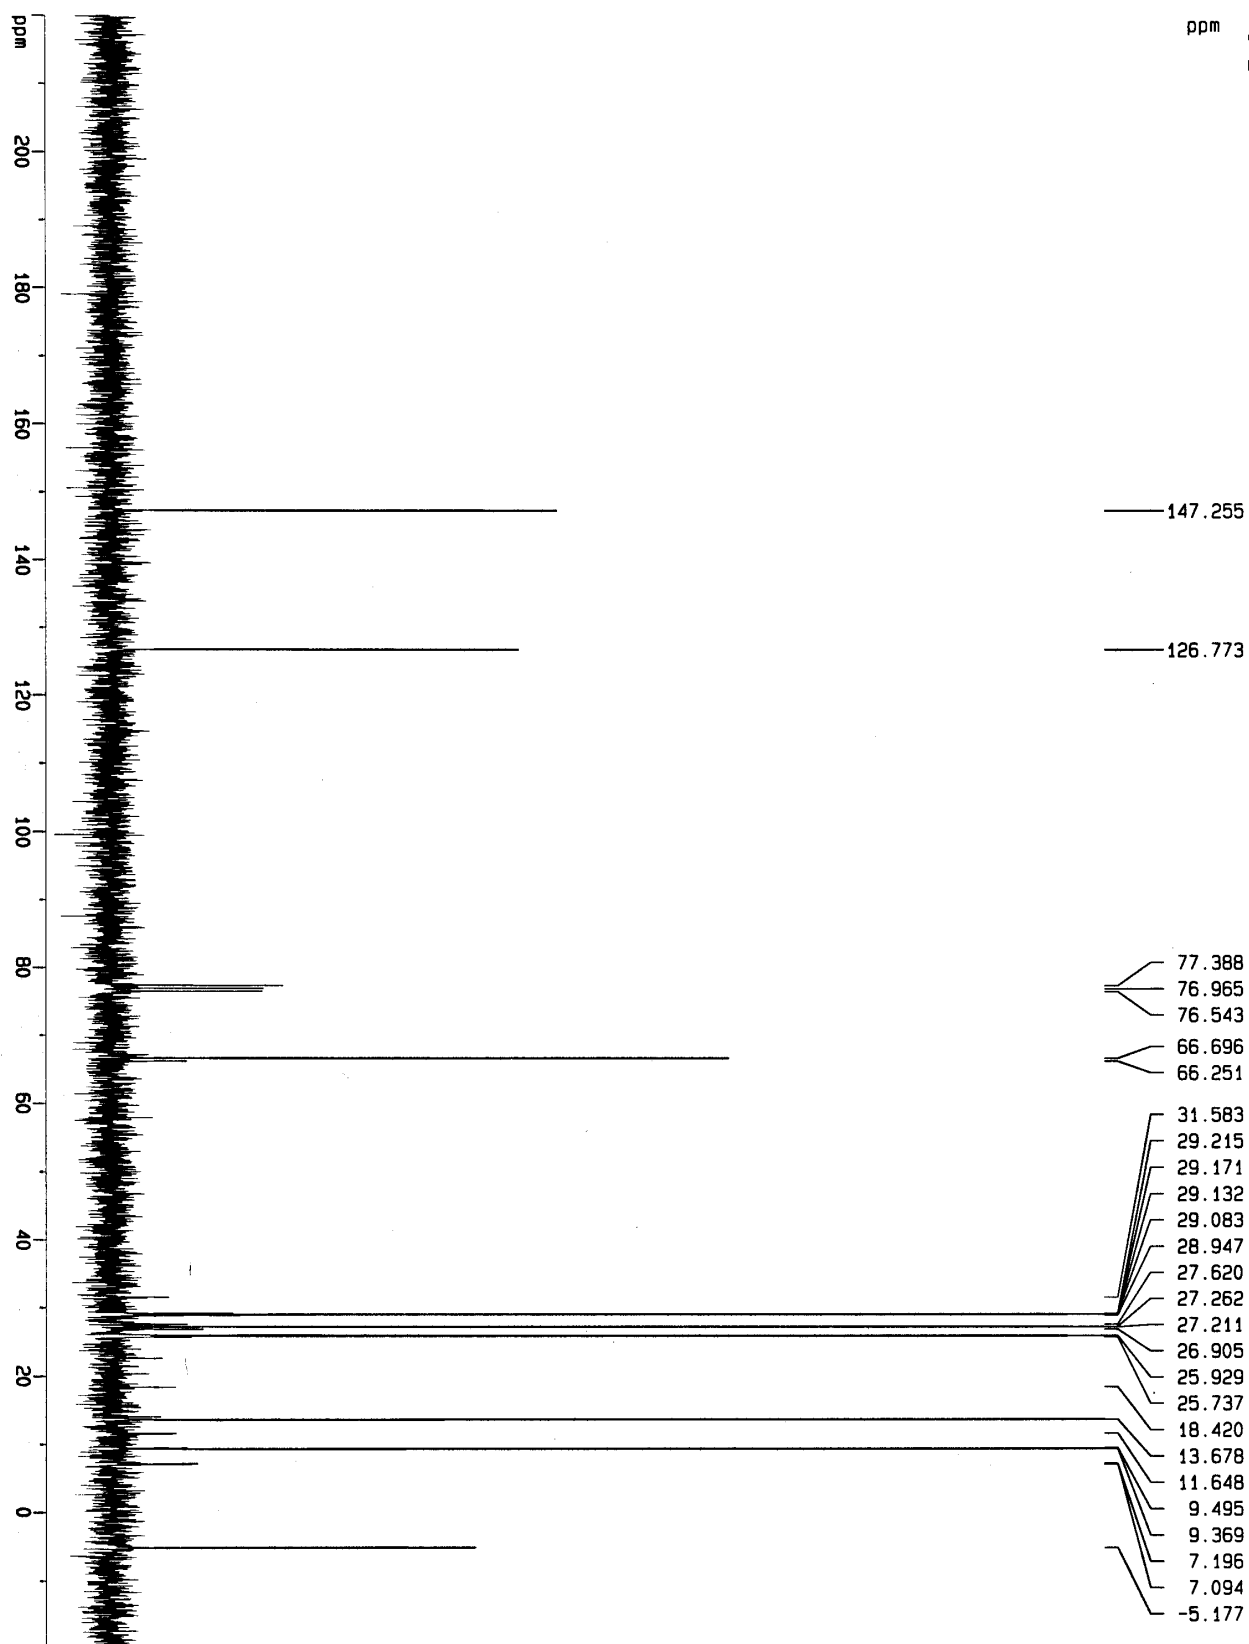

18

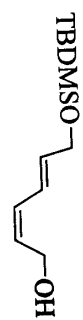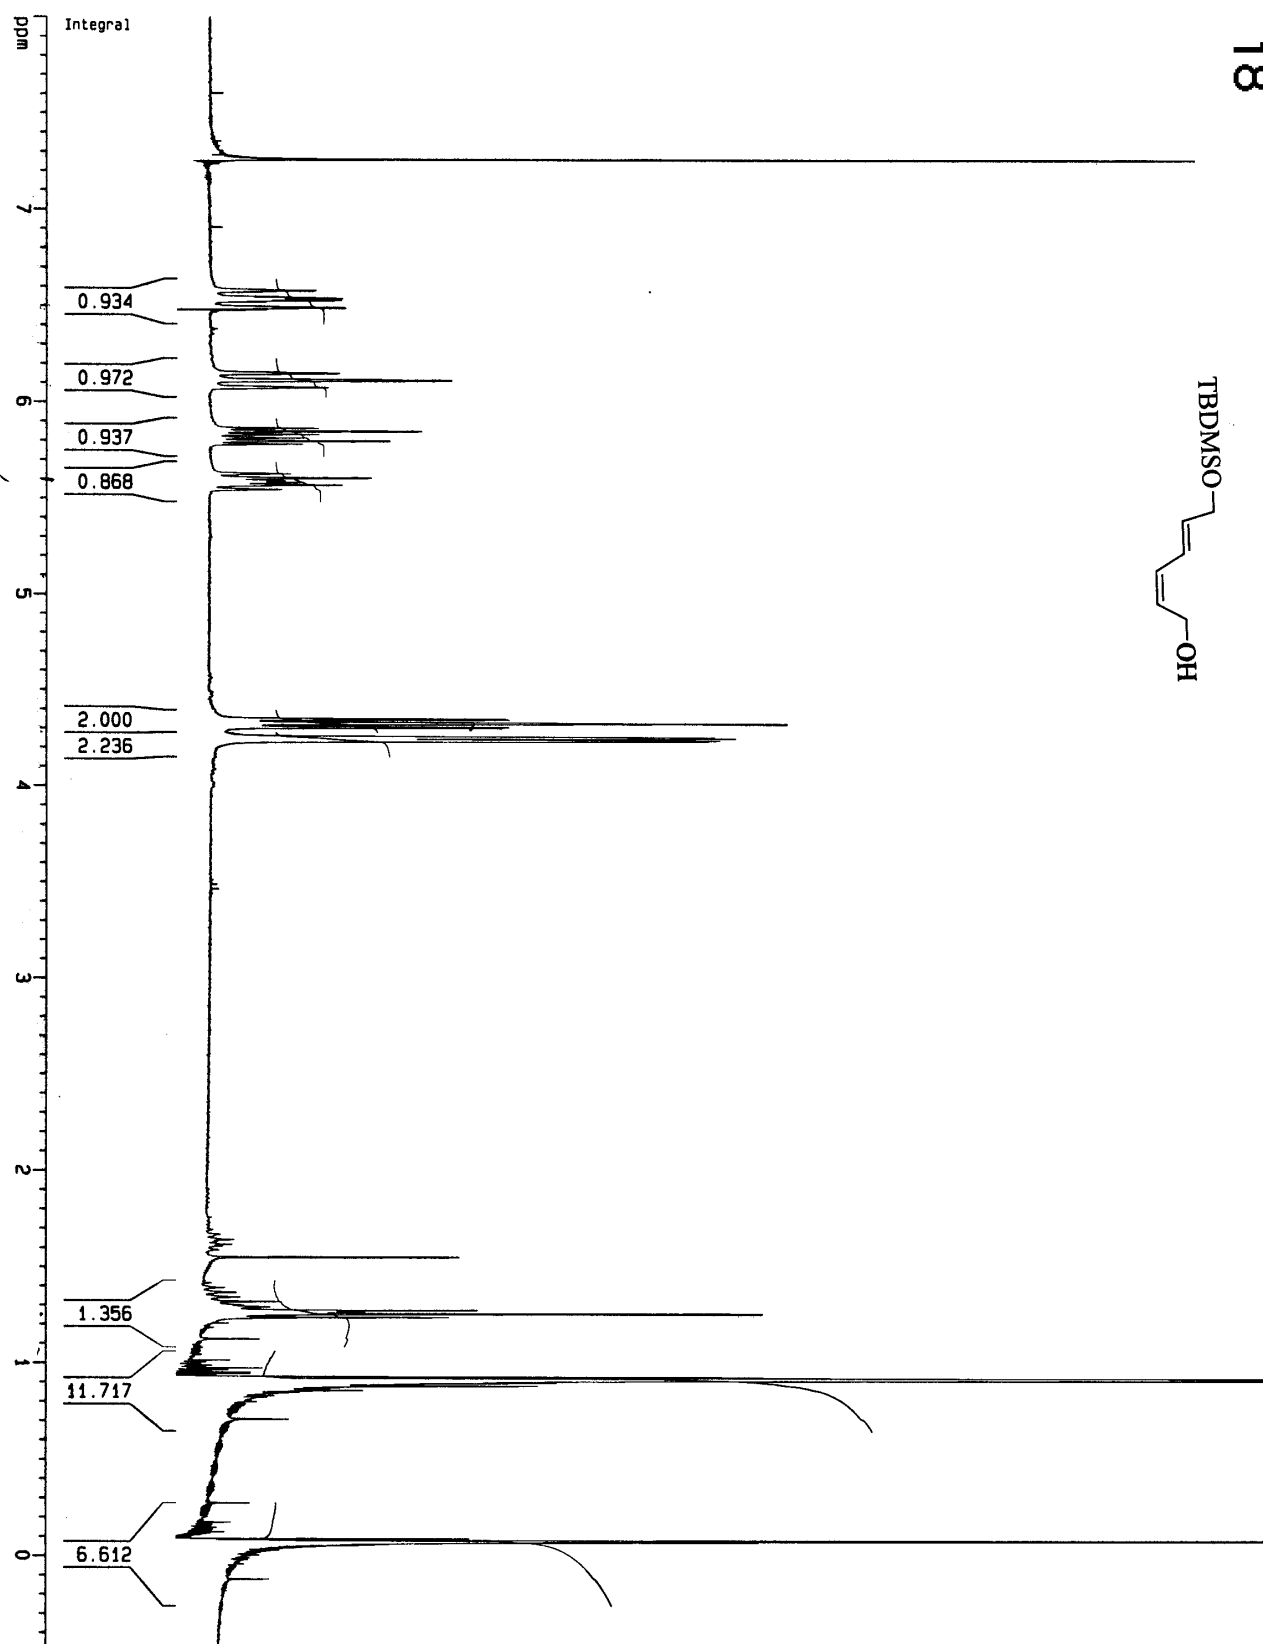

ppm

18

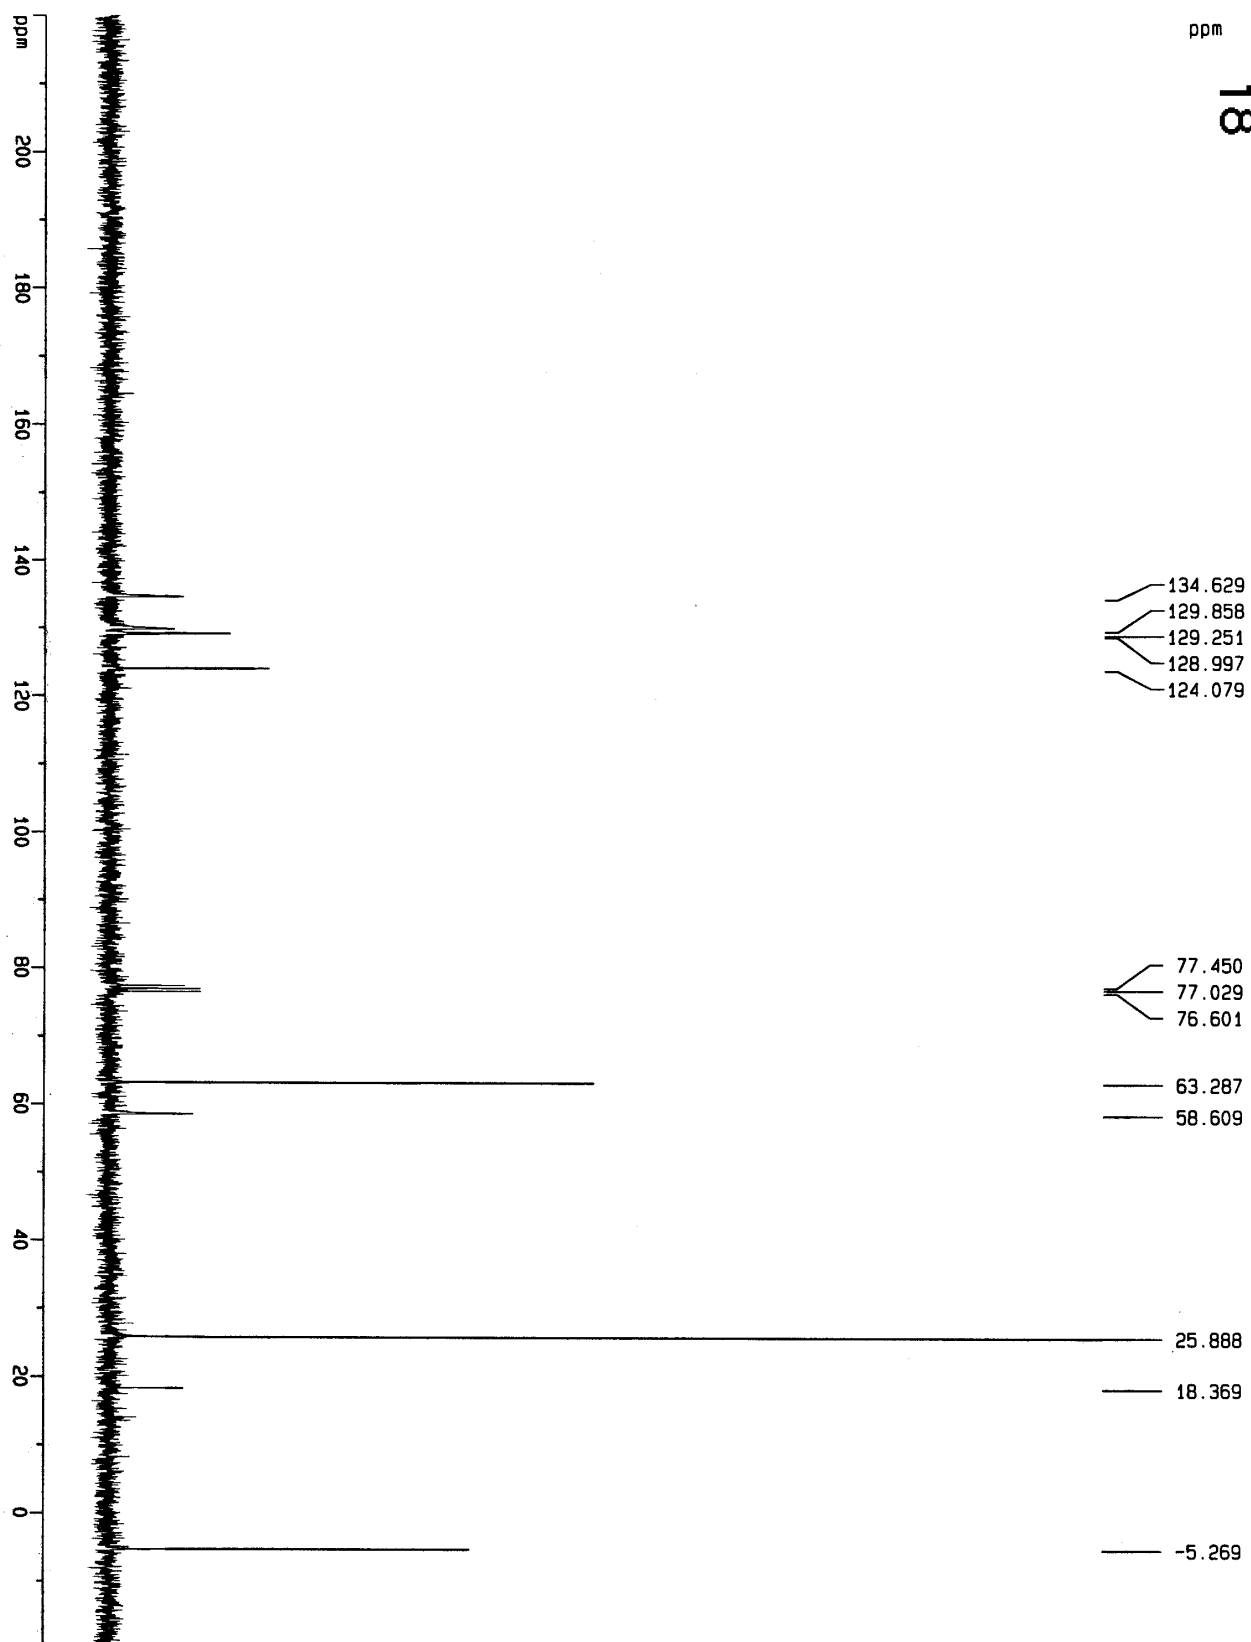

19

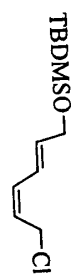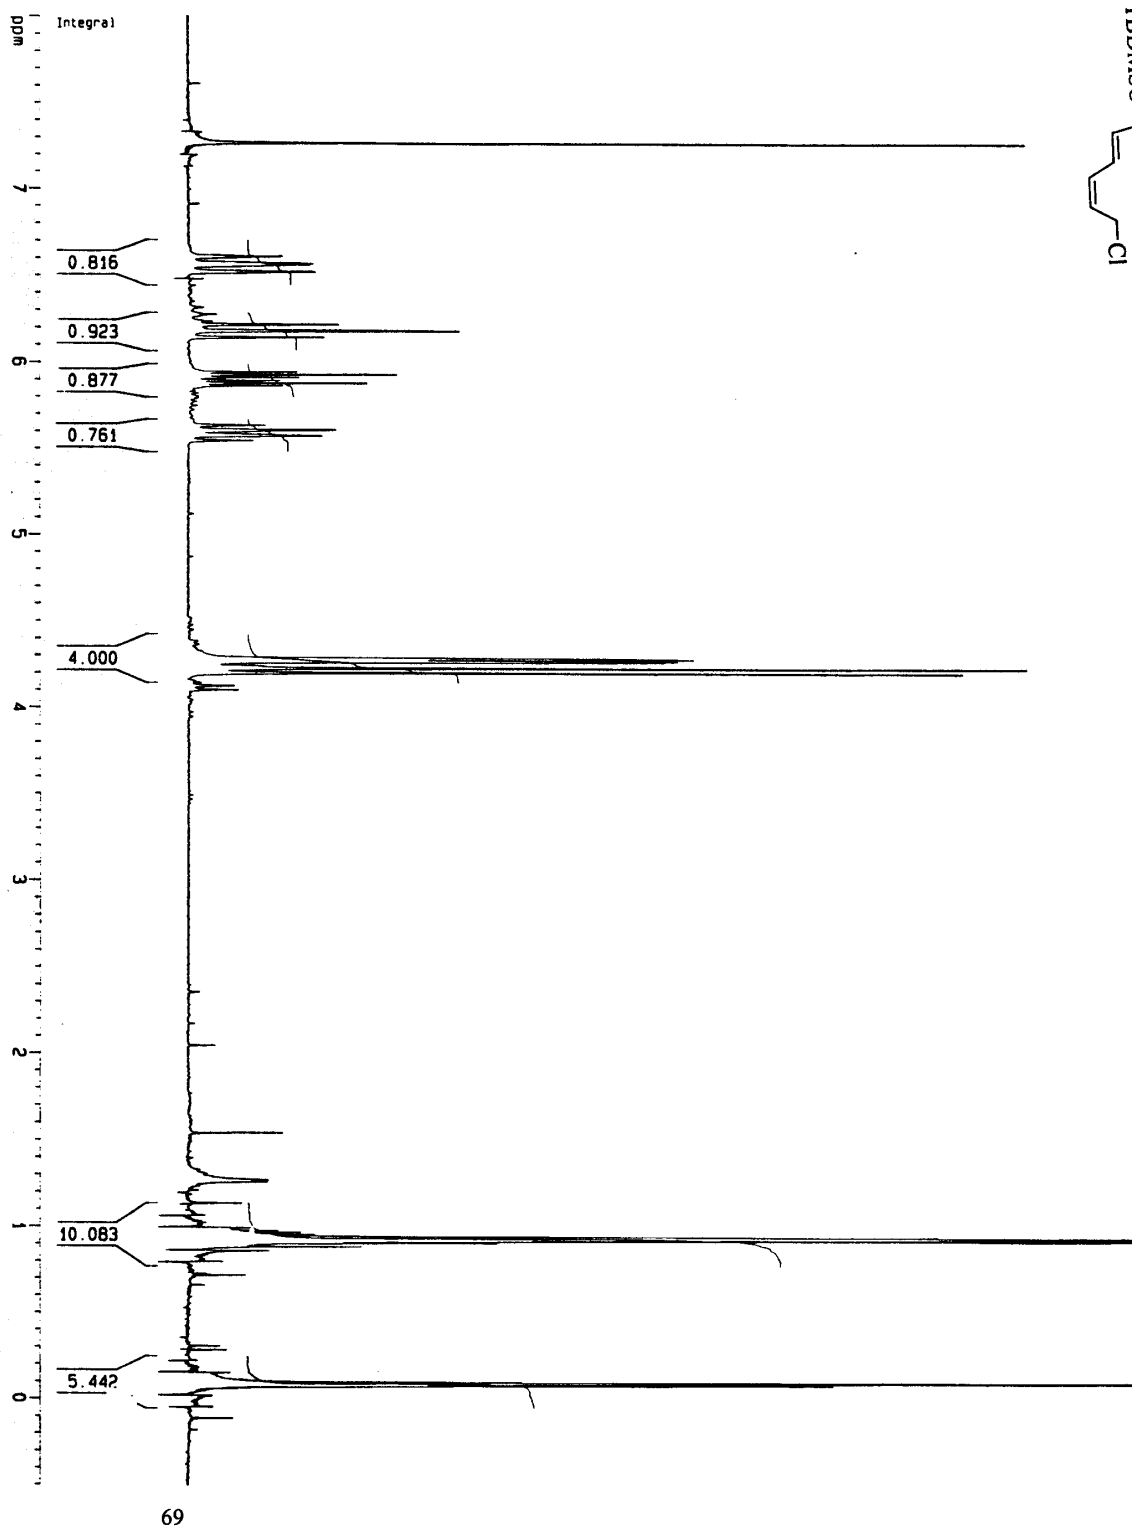

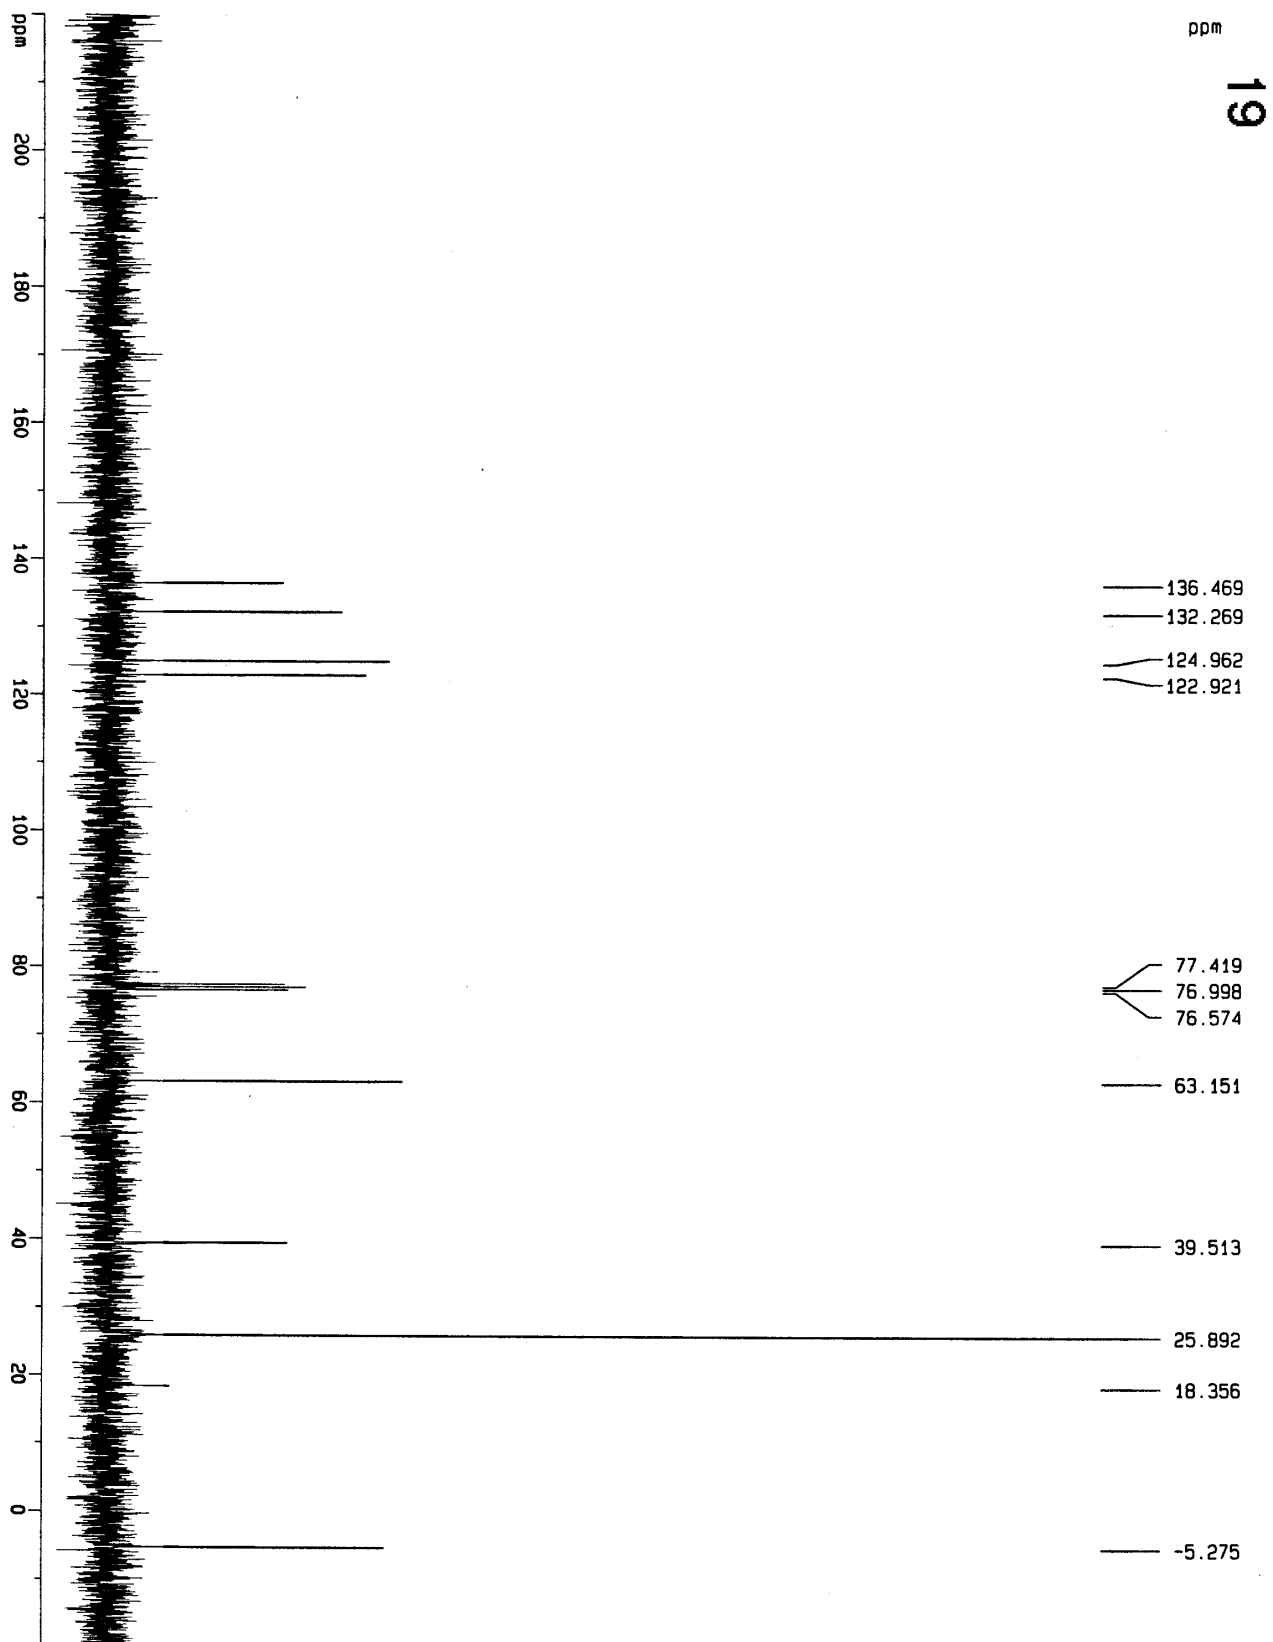



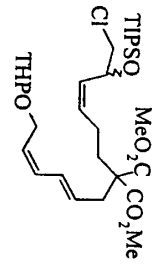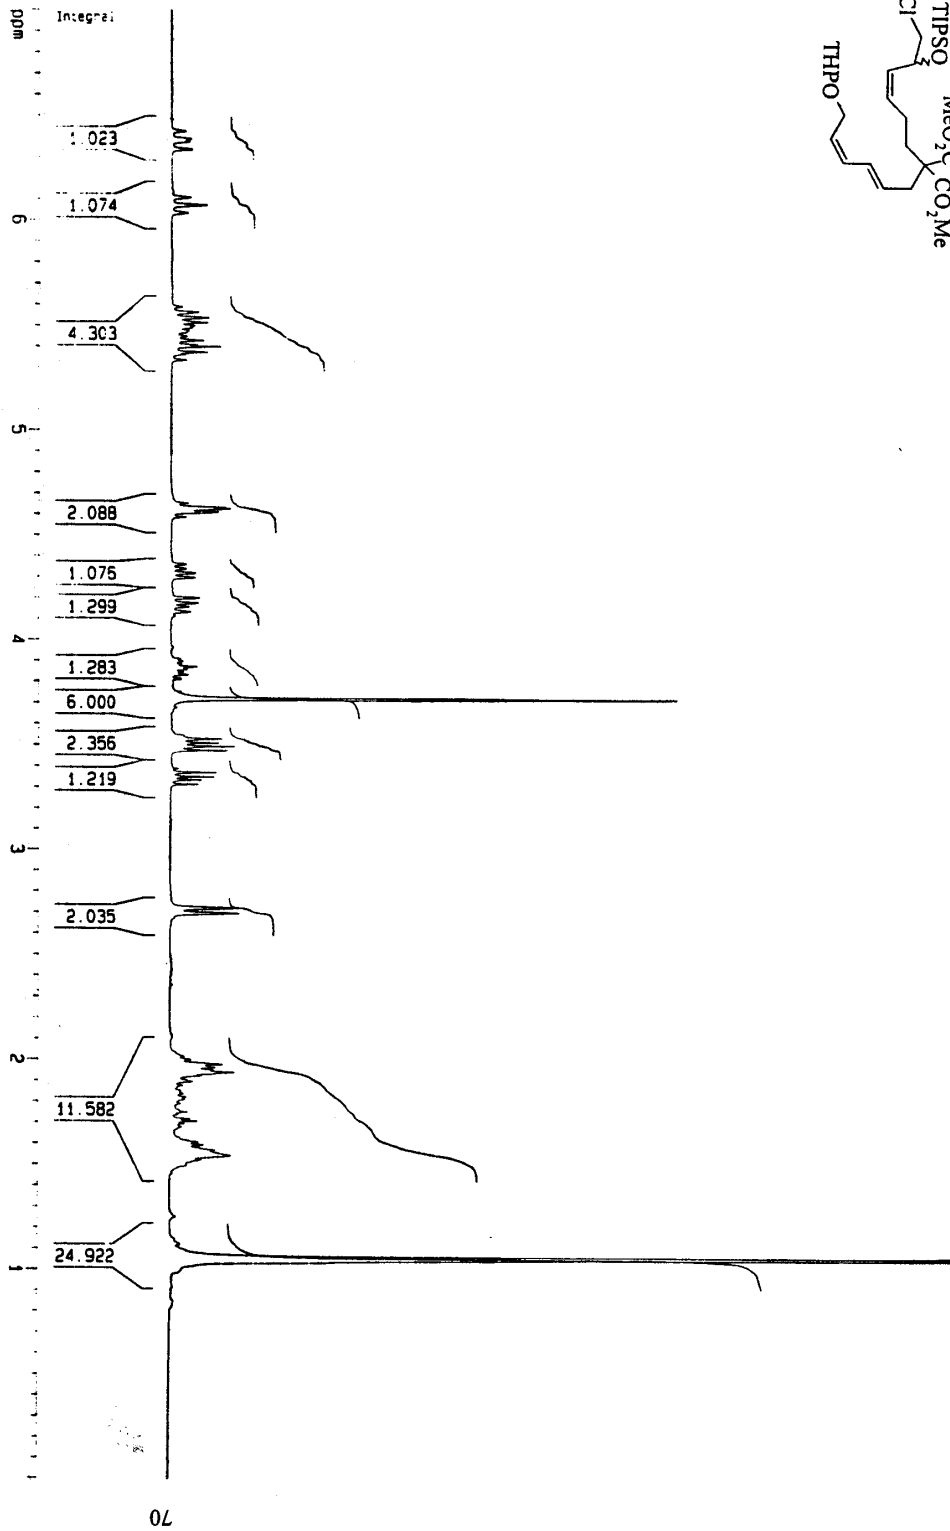

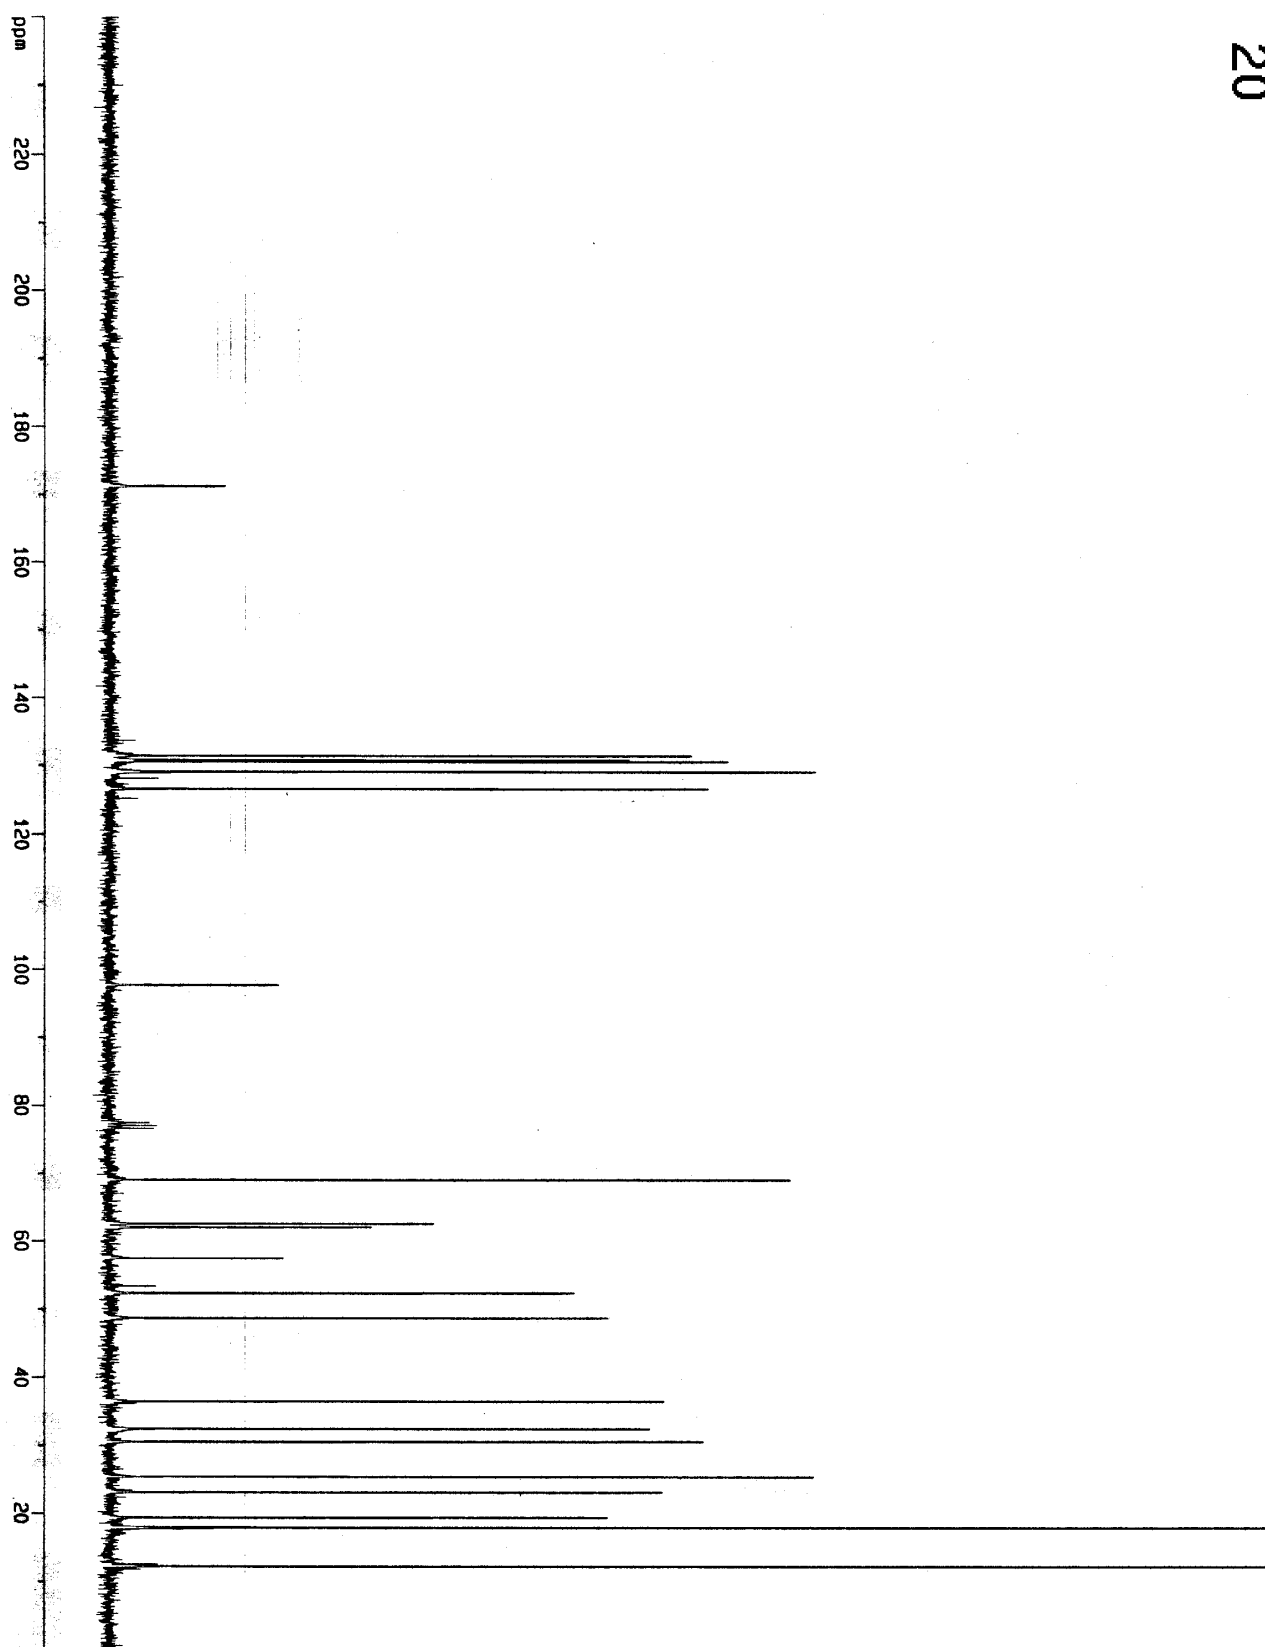

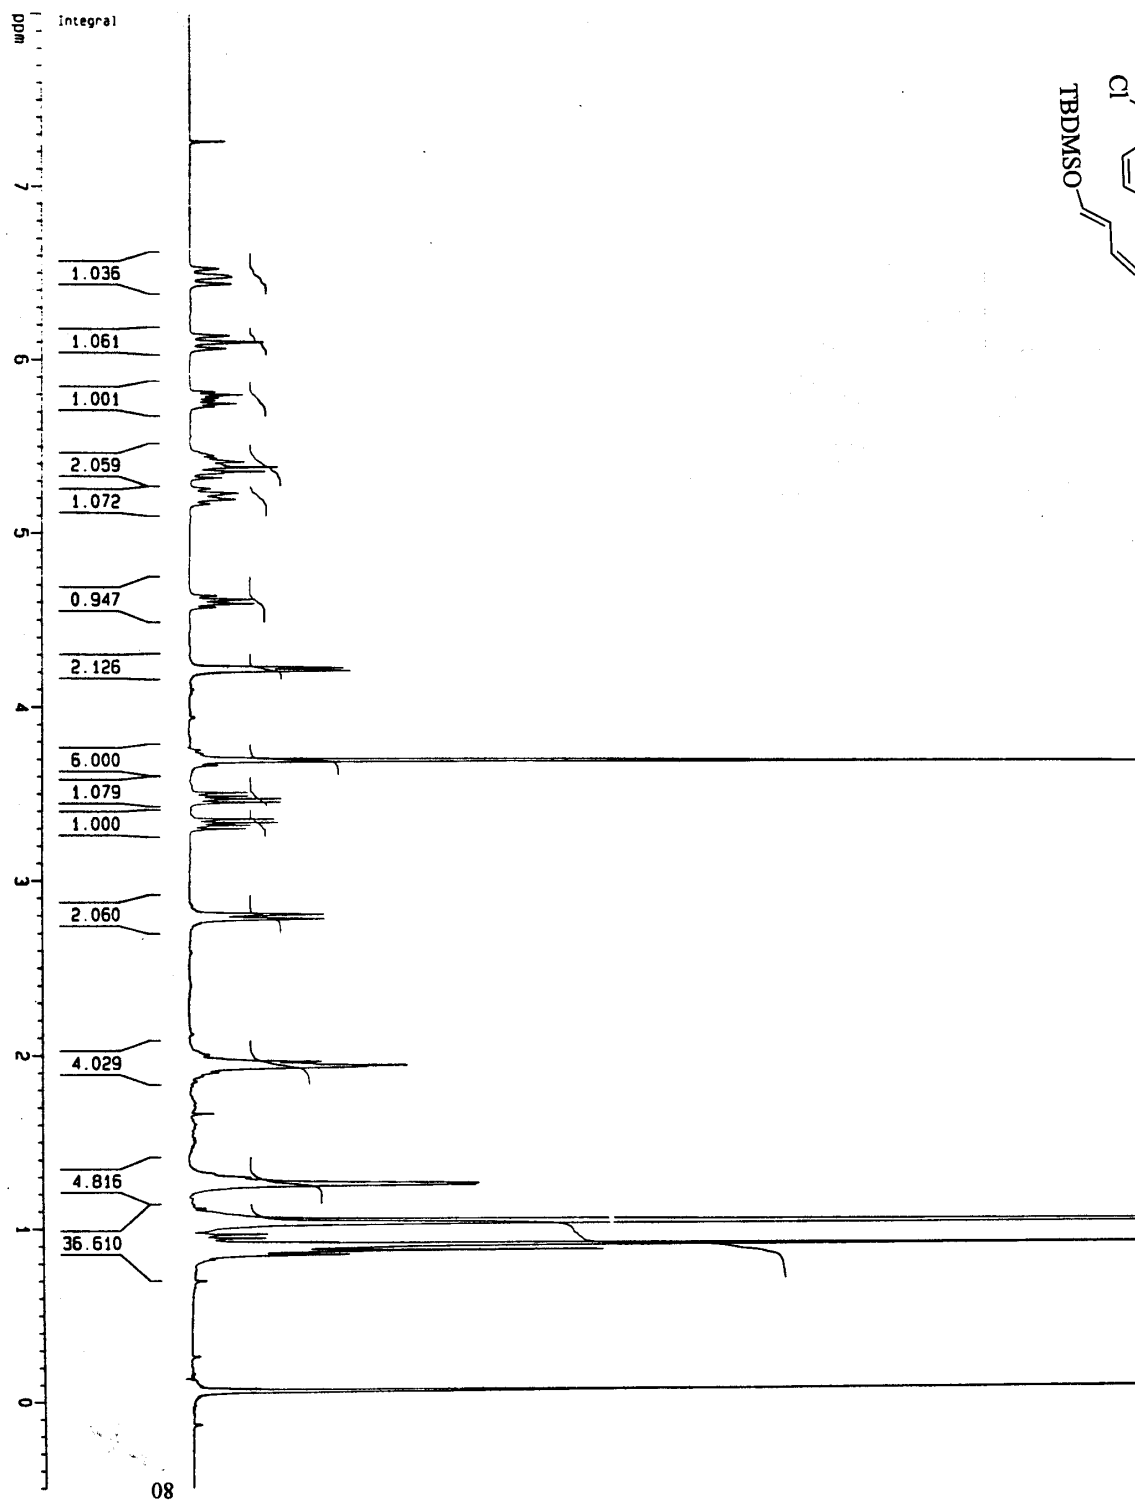

21

ppm

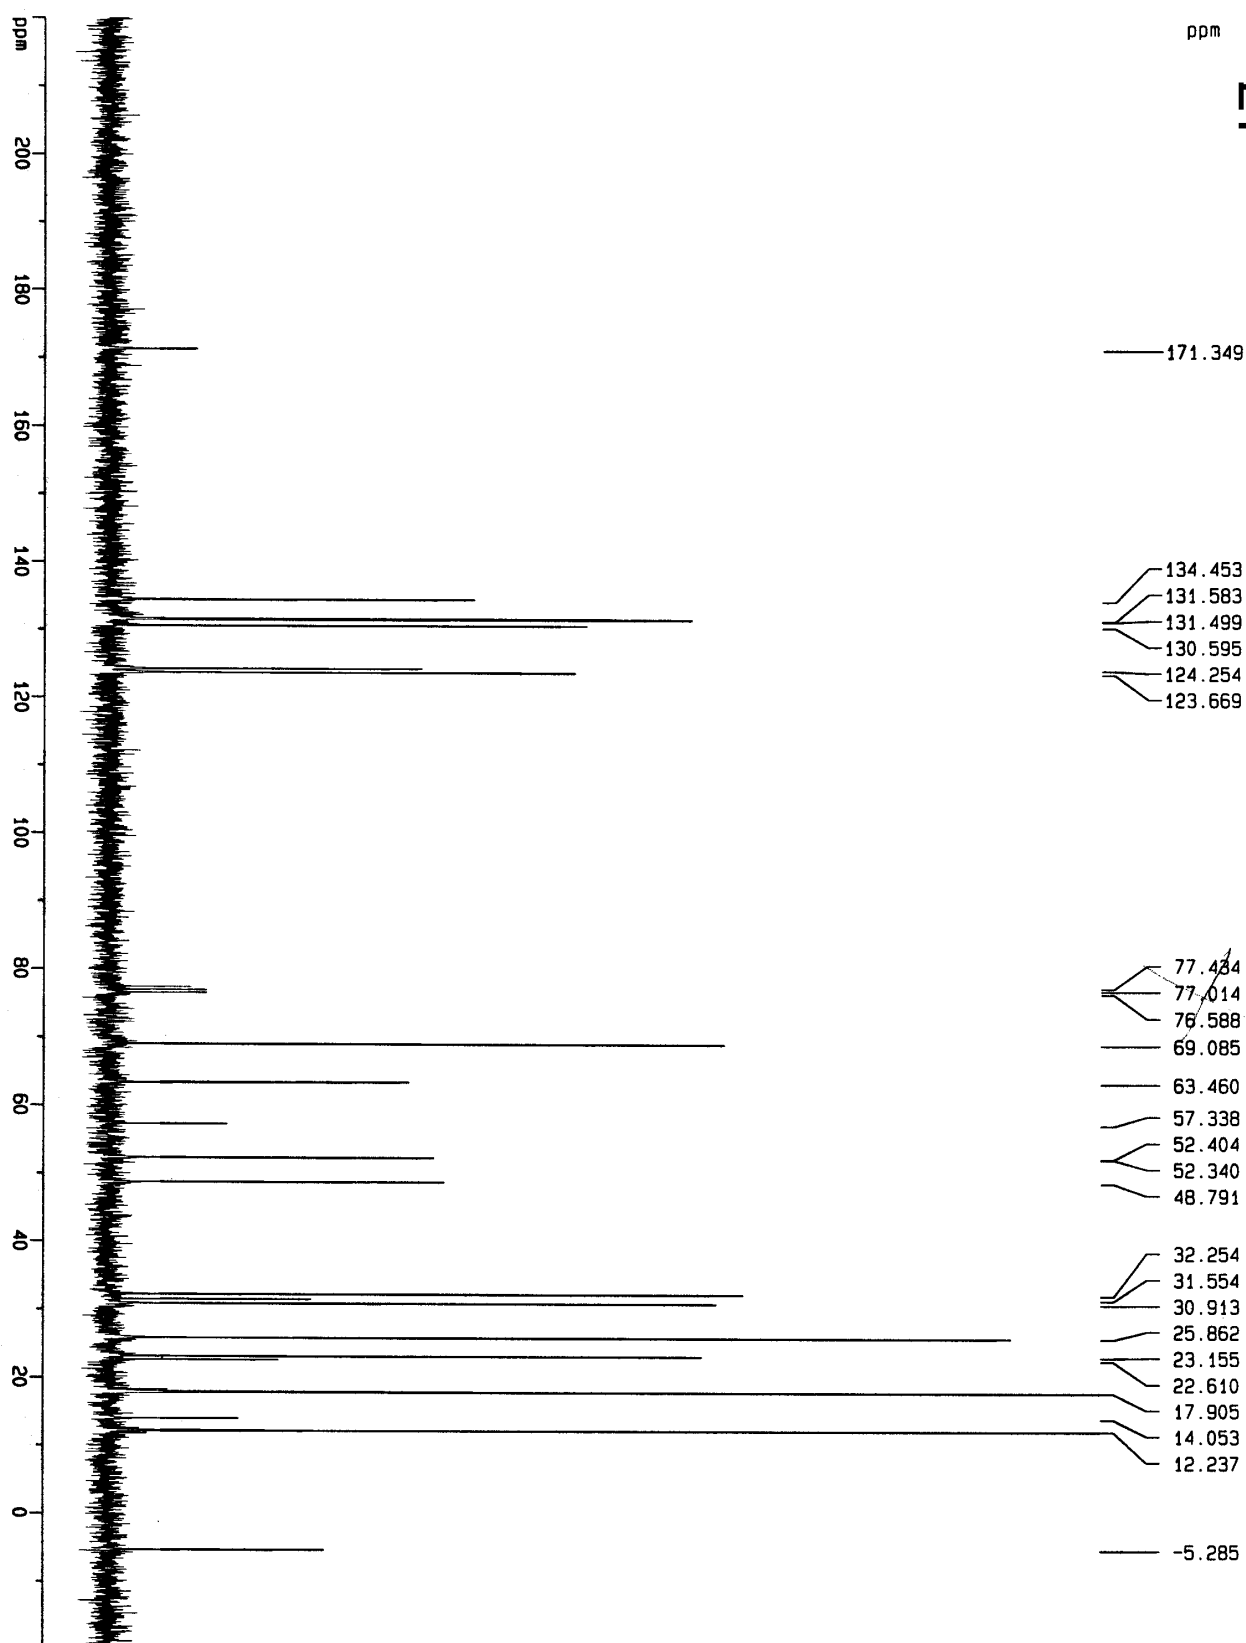

22

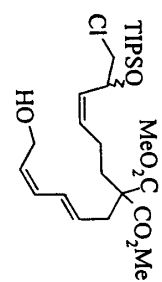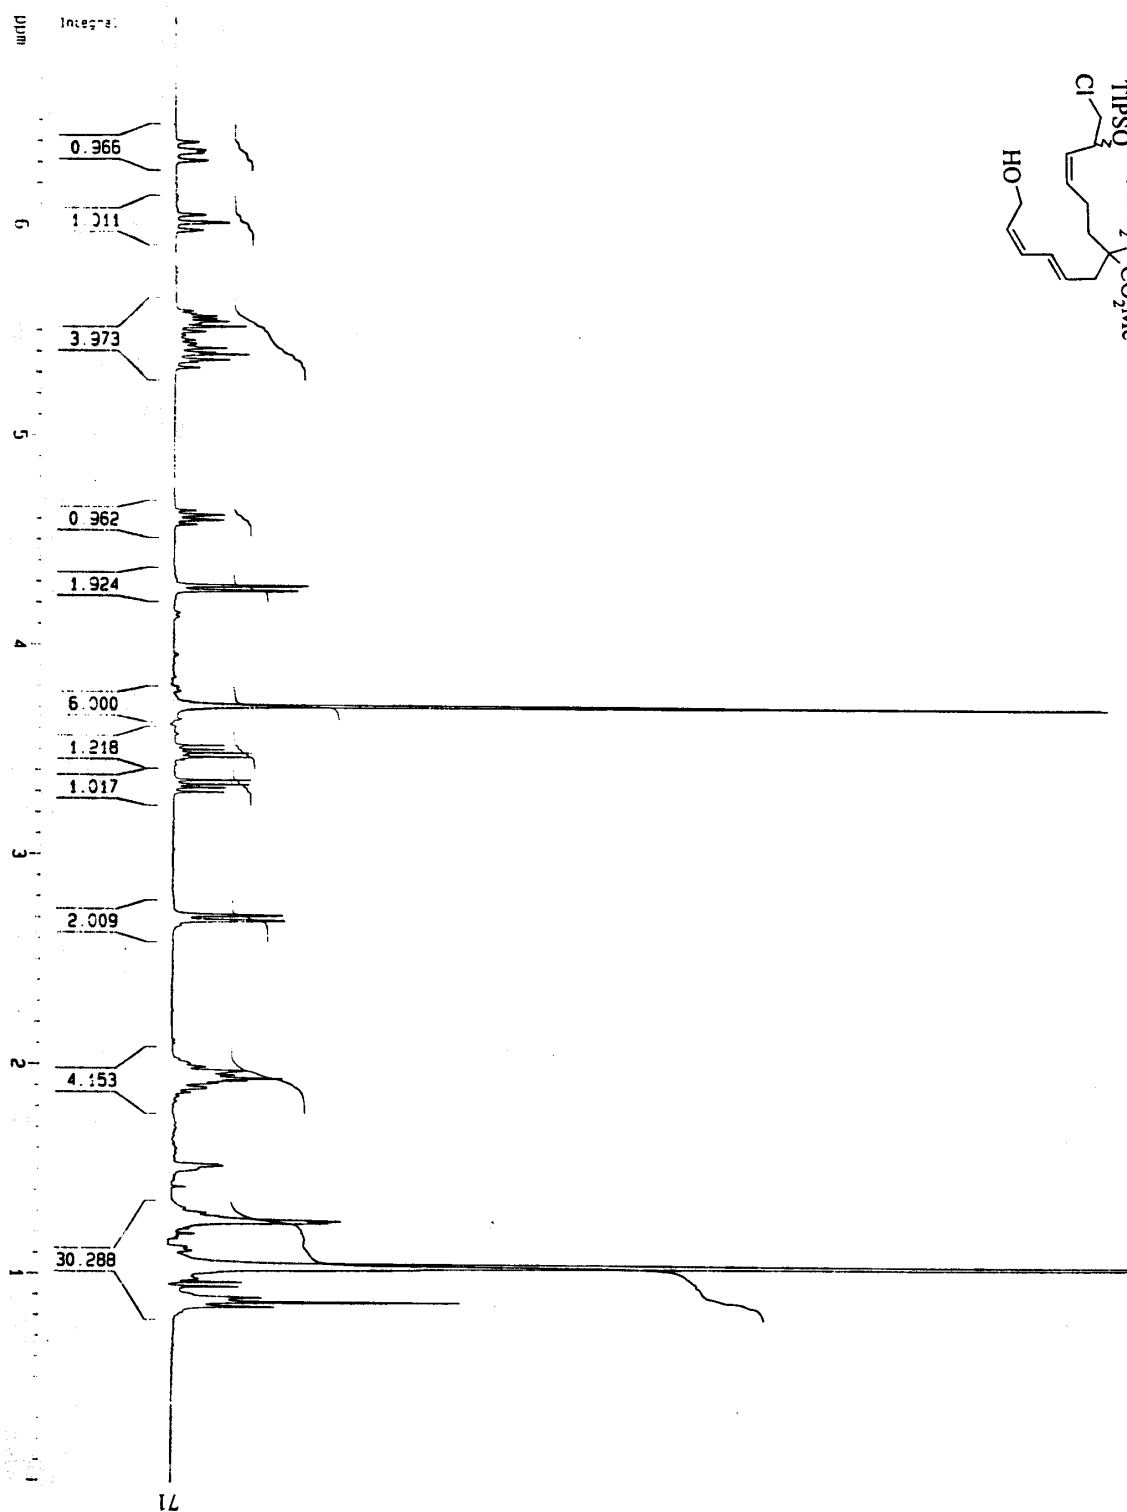

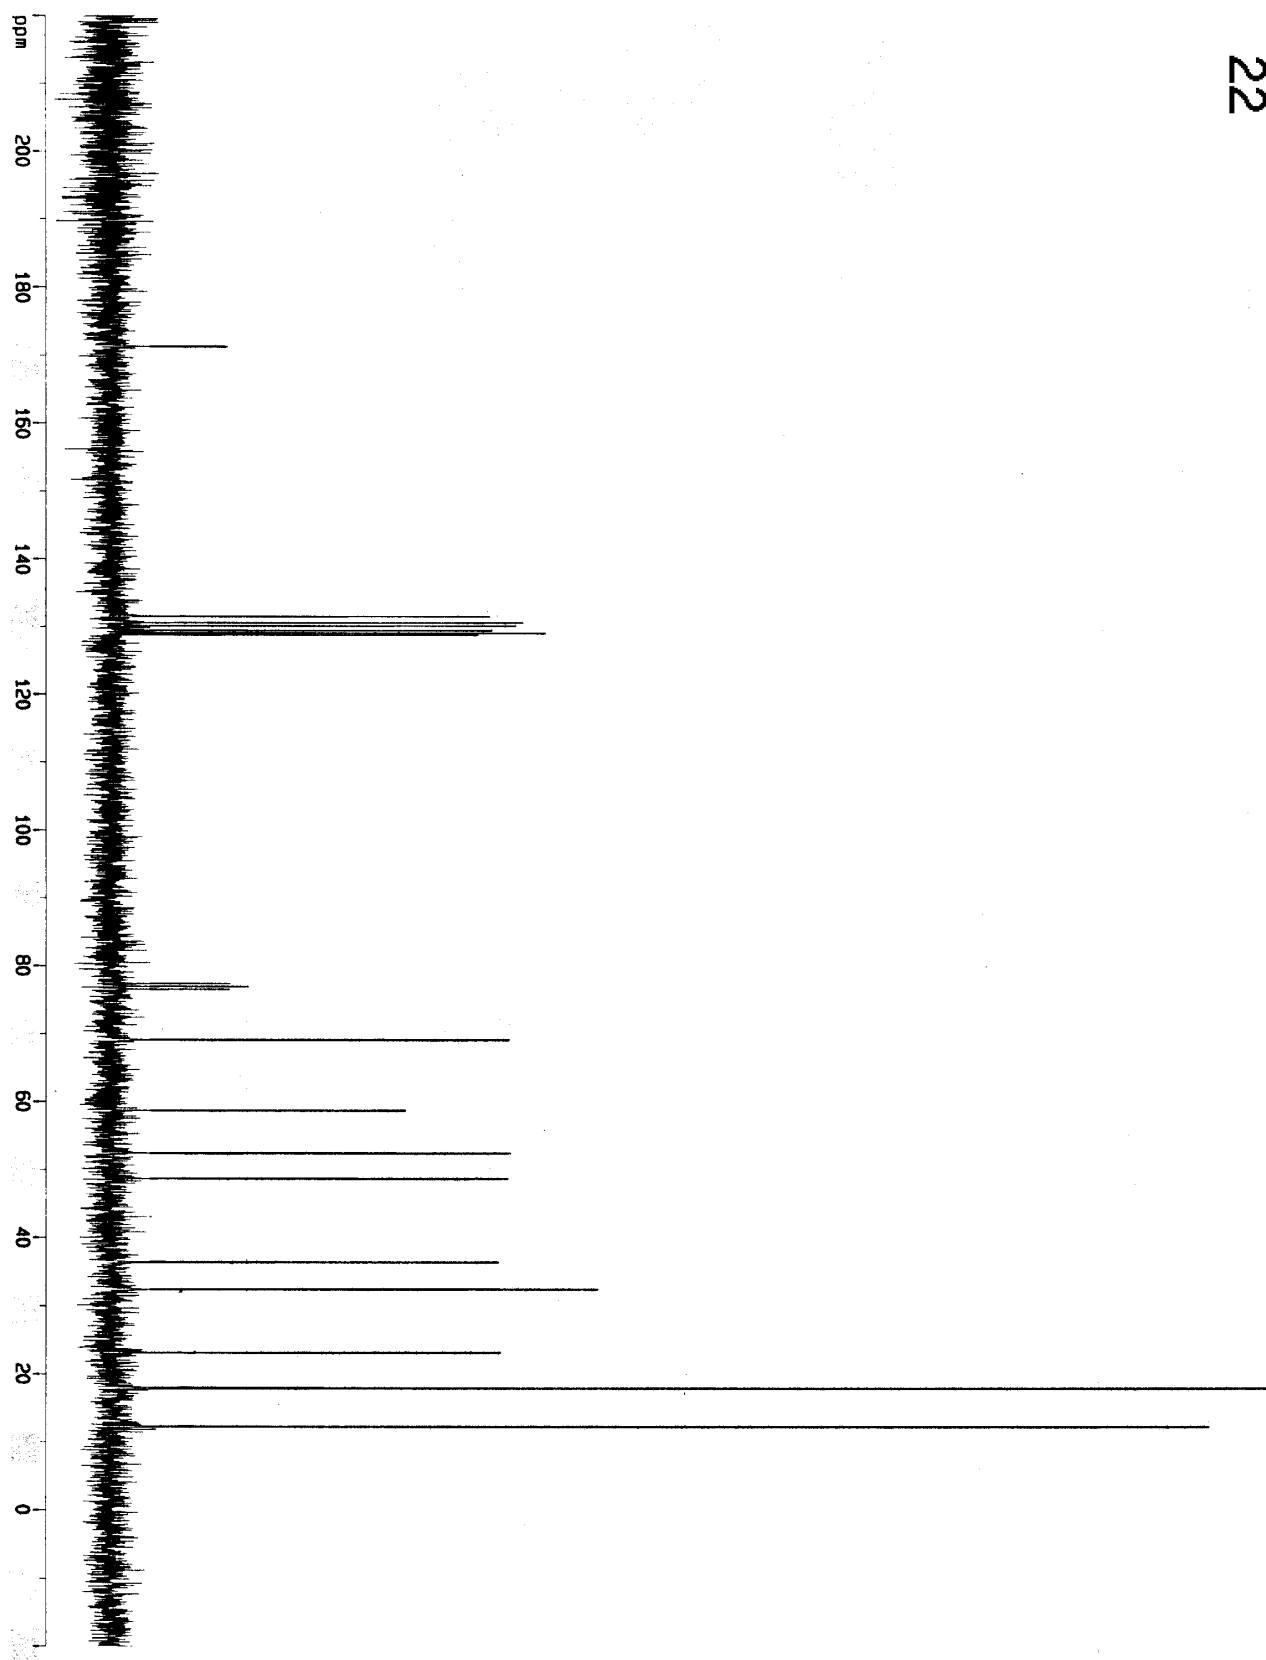

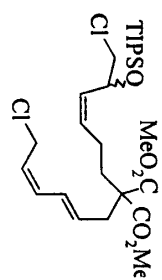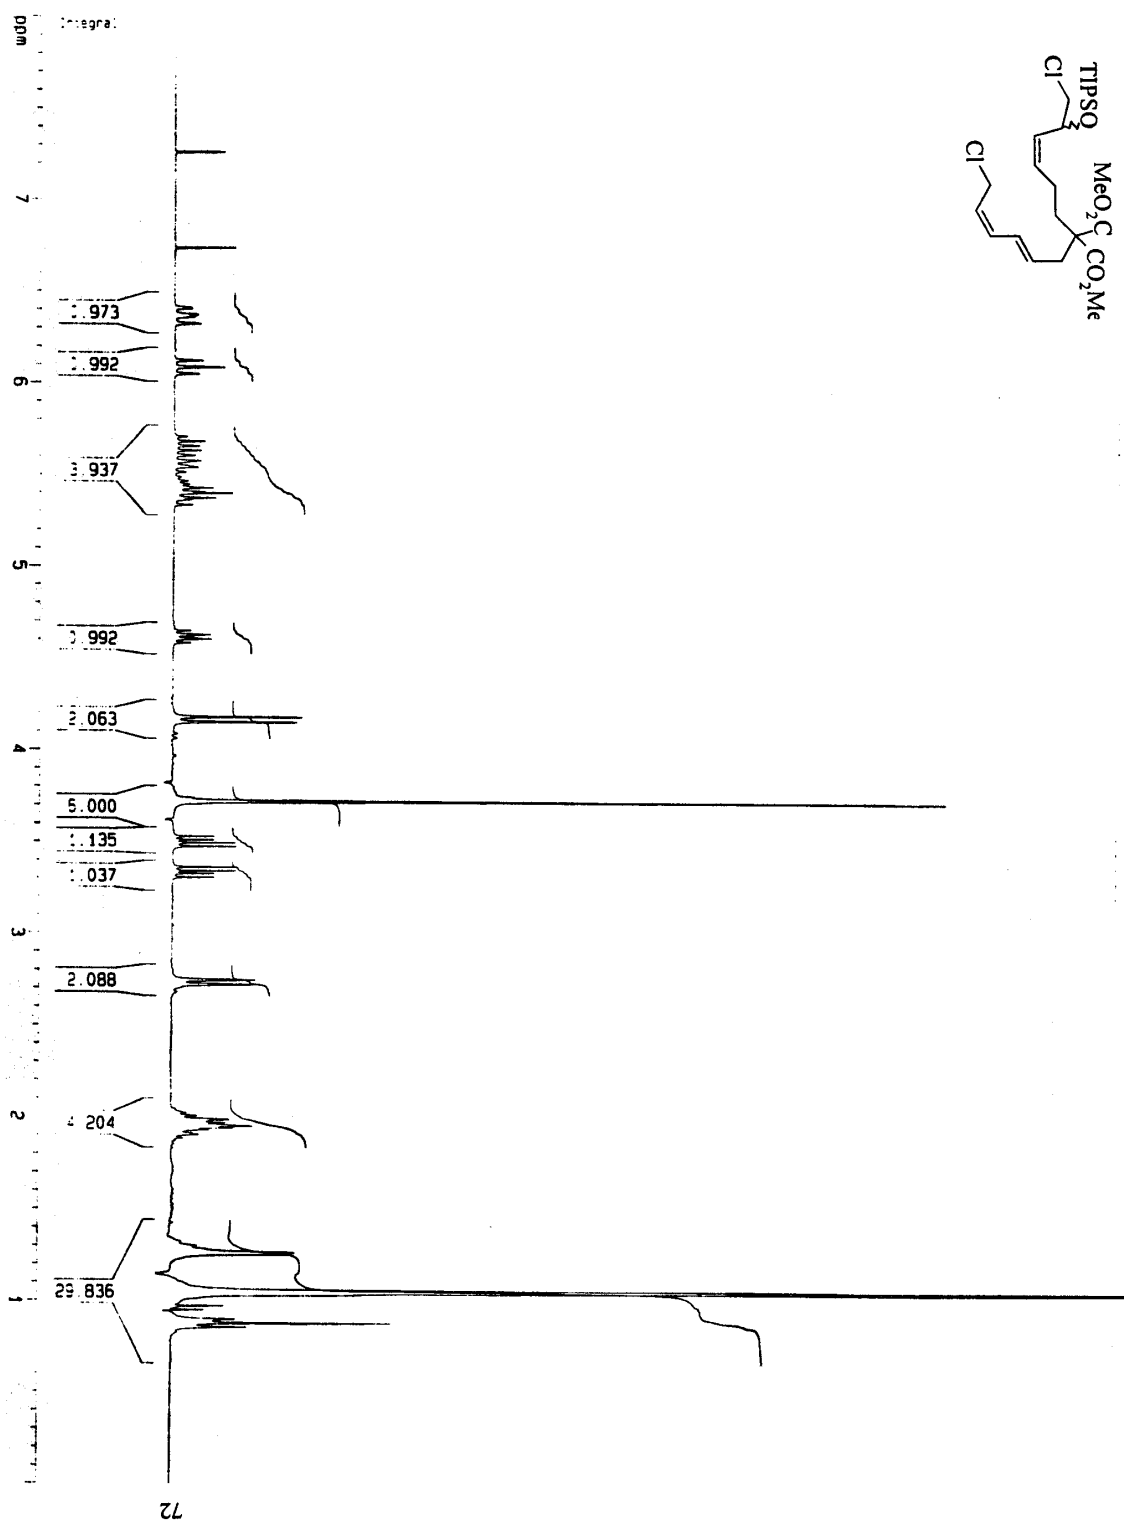

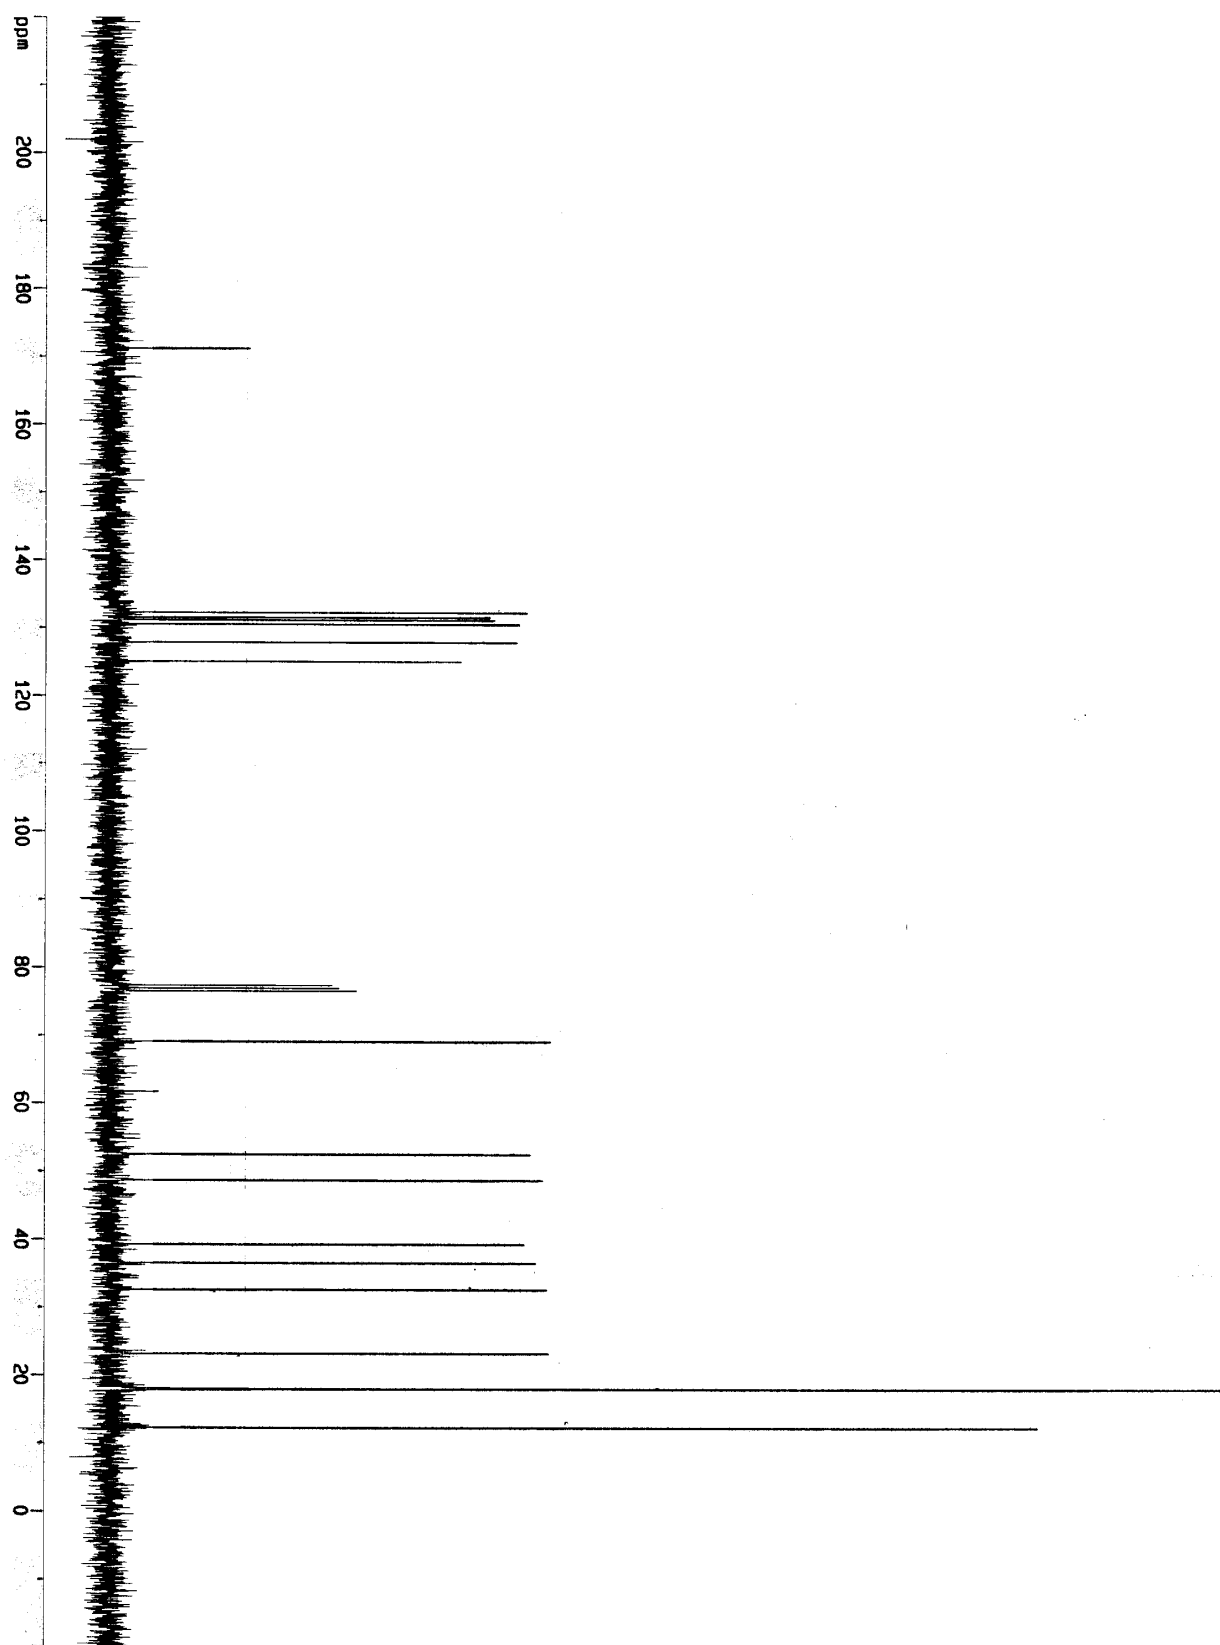



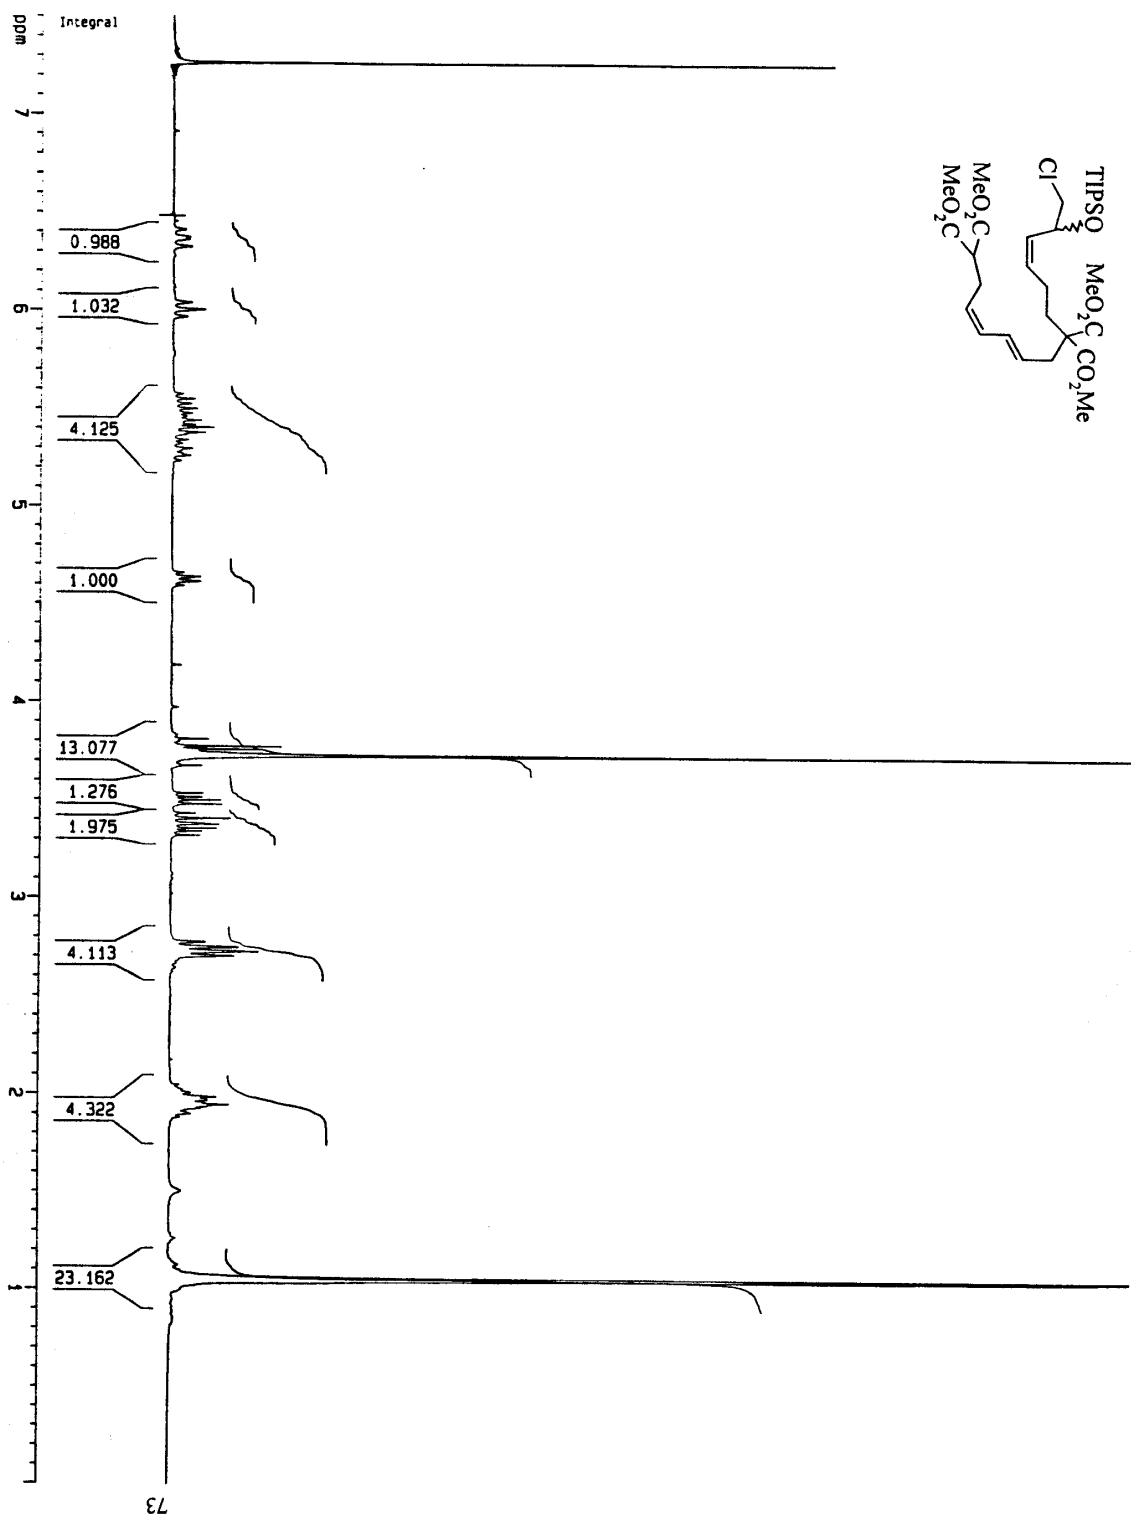

24

ppm

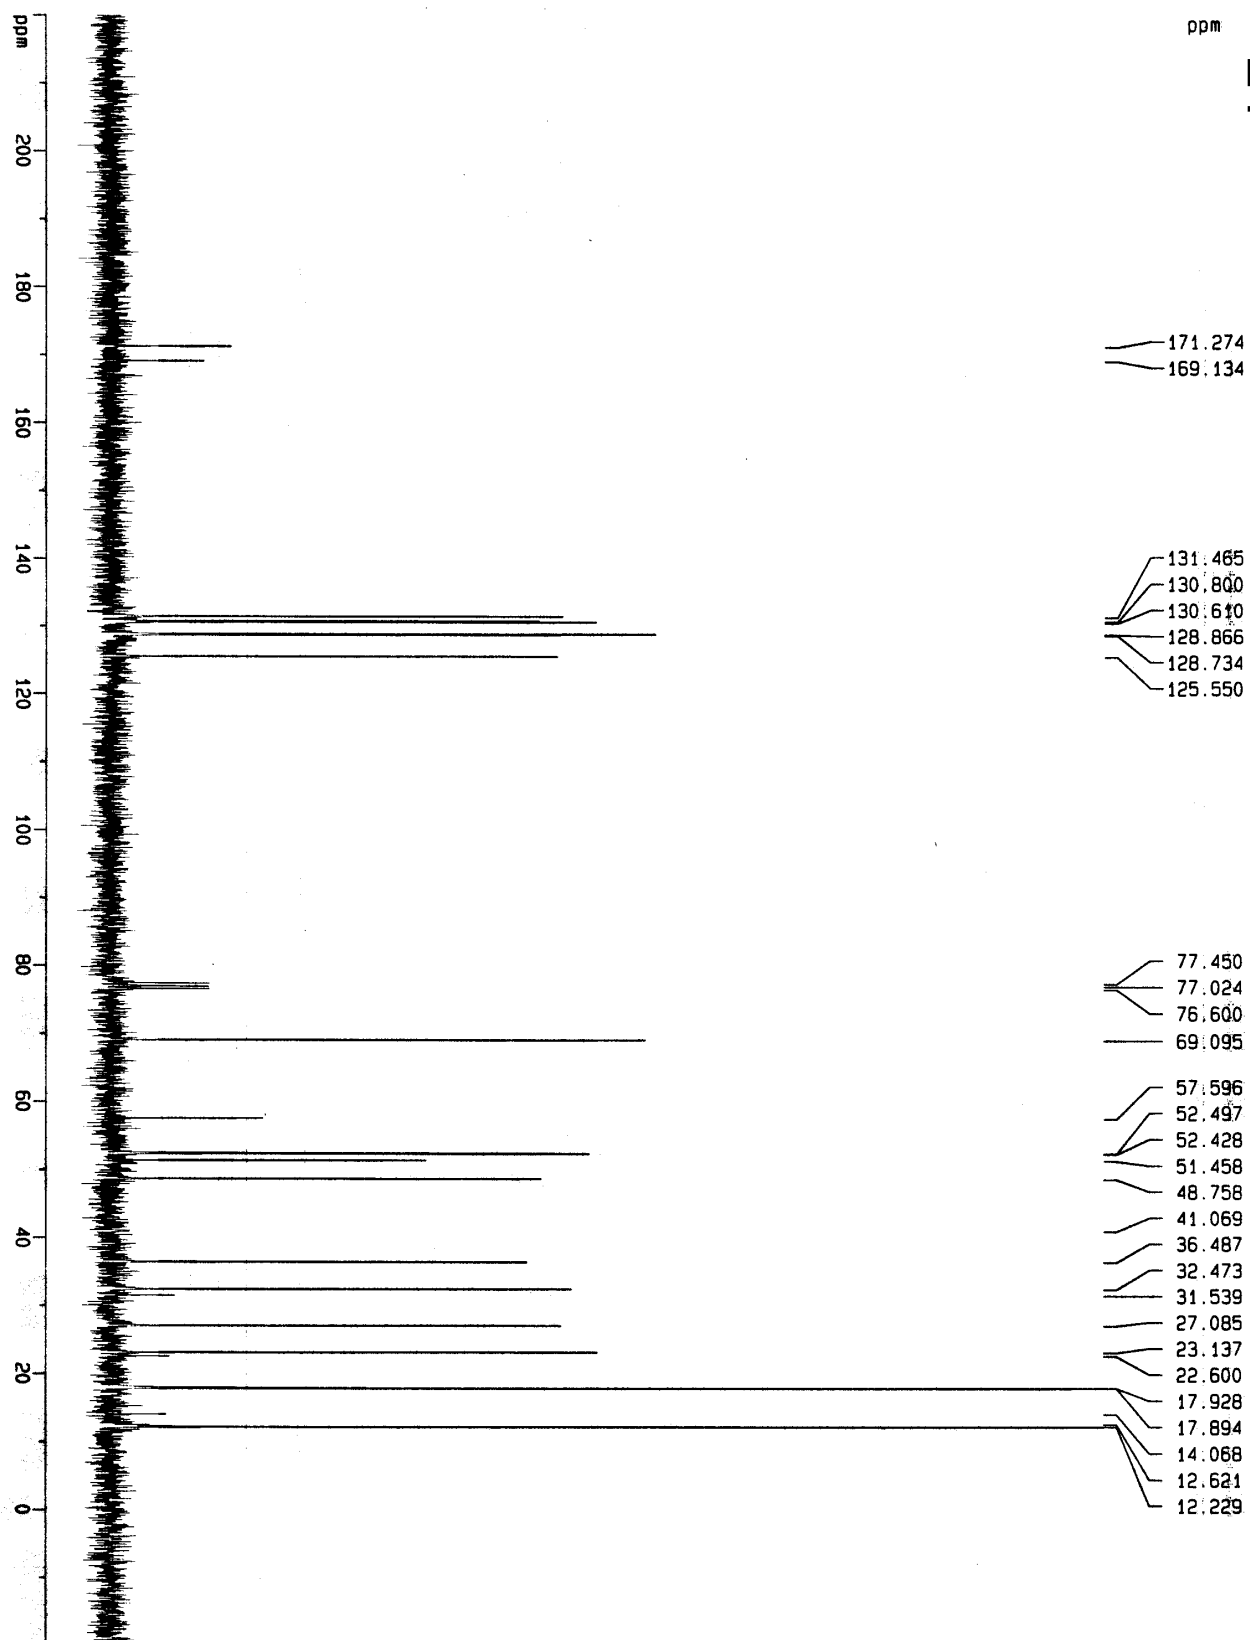

25

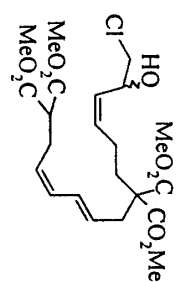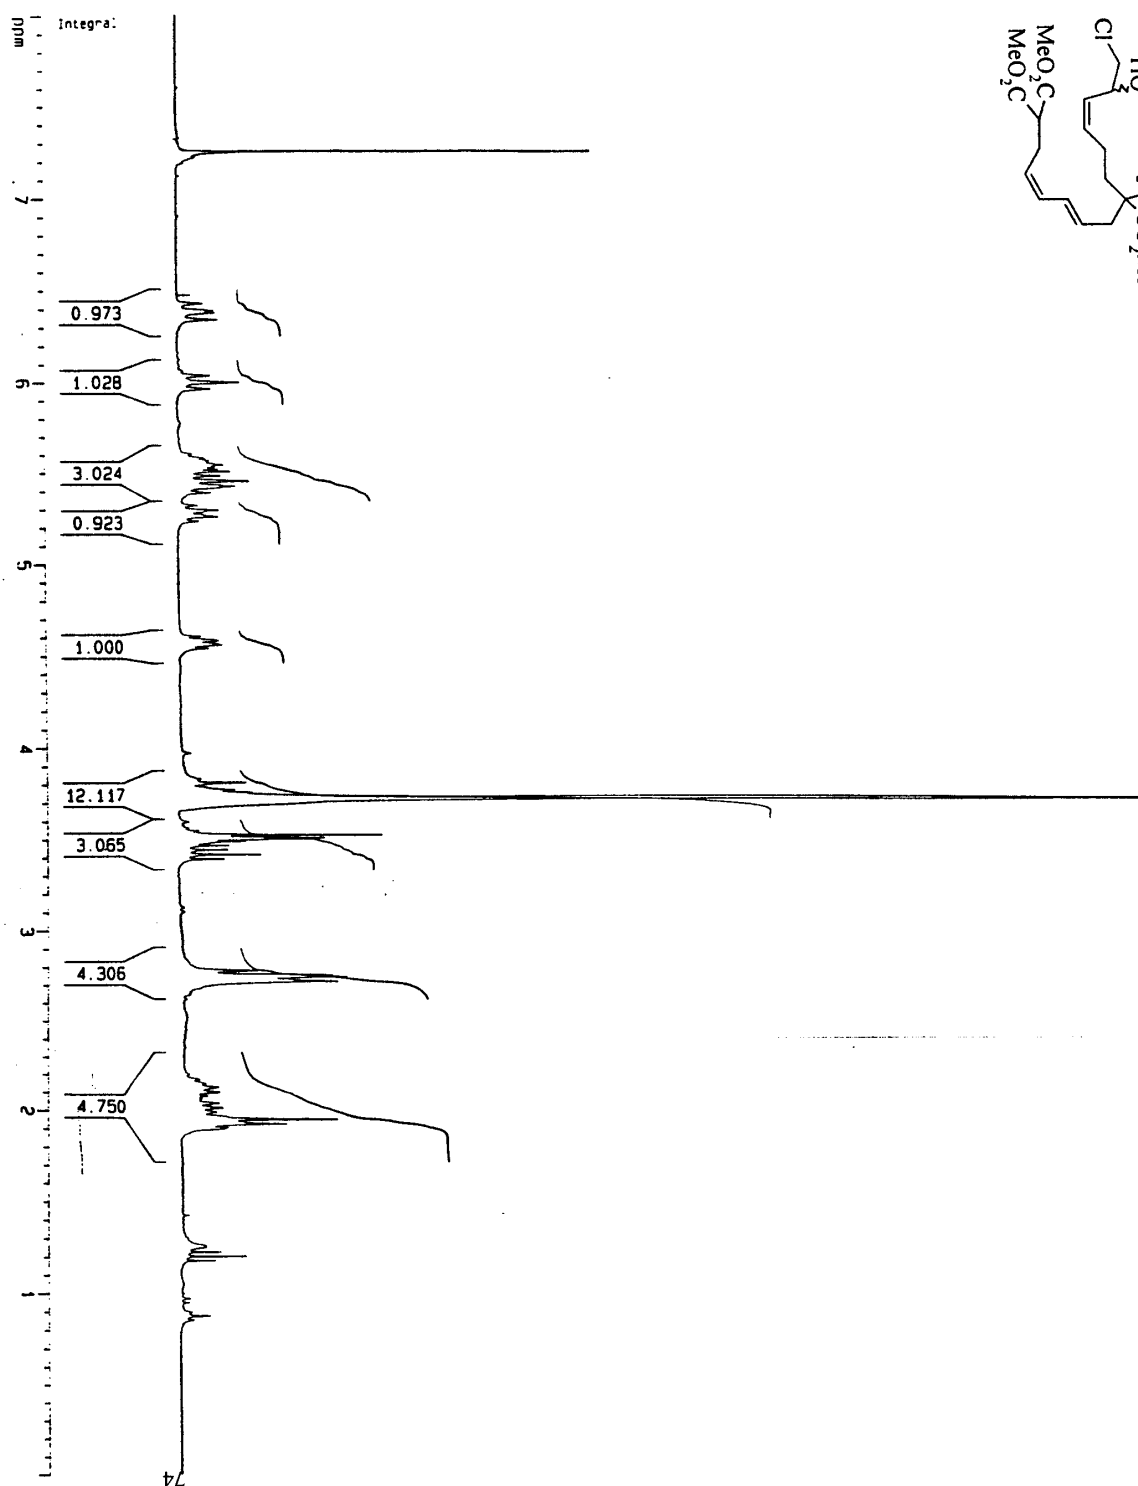

25

ppm

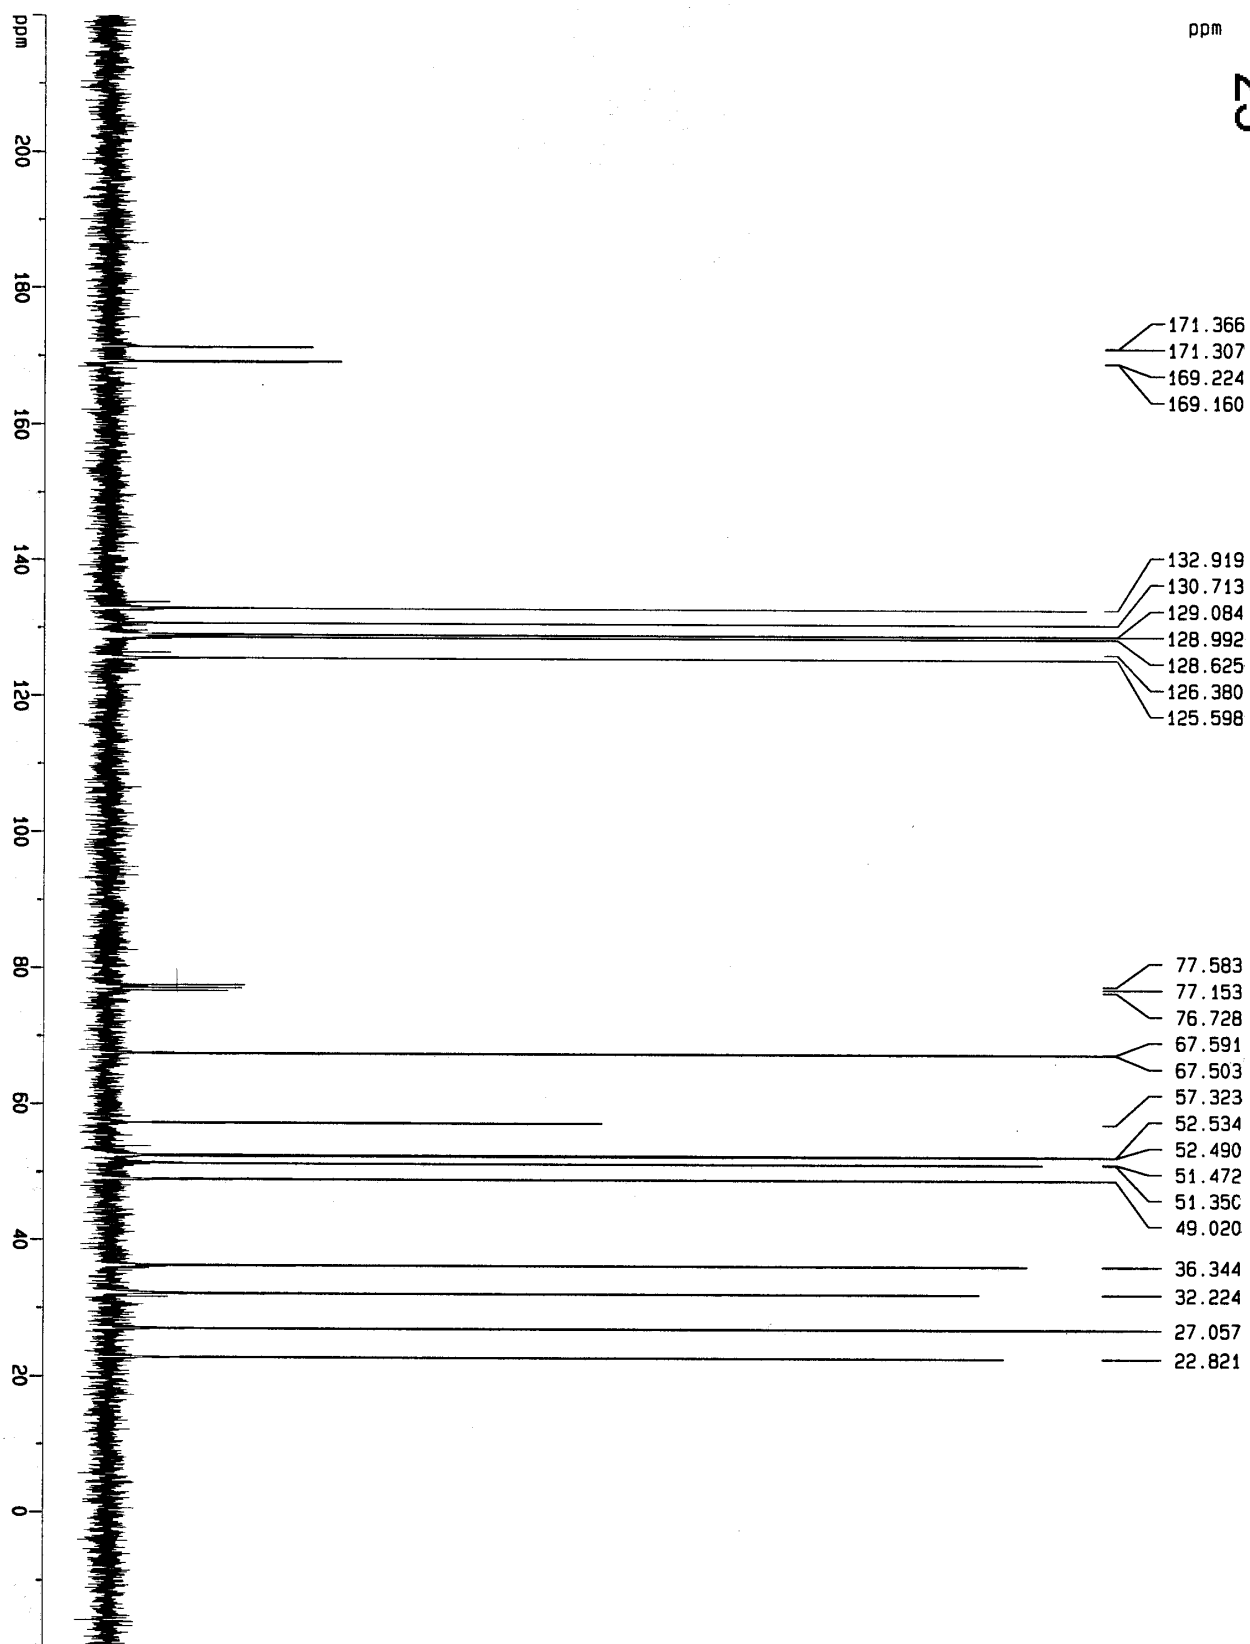

26

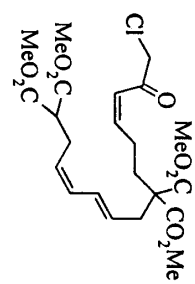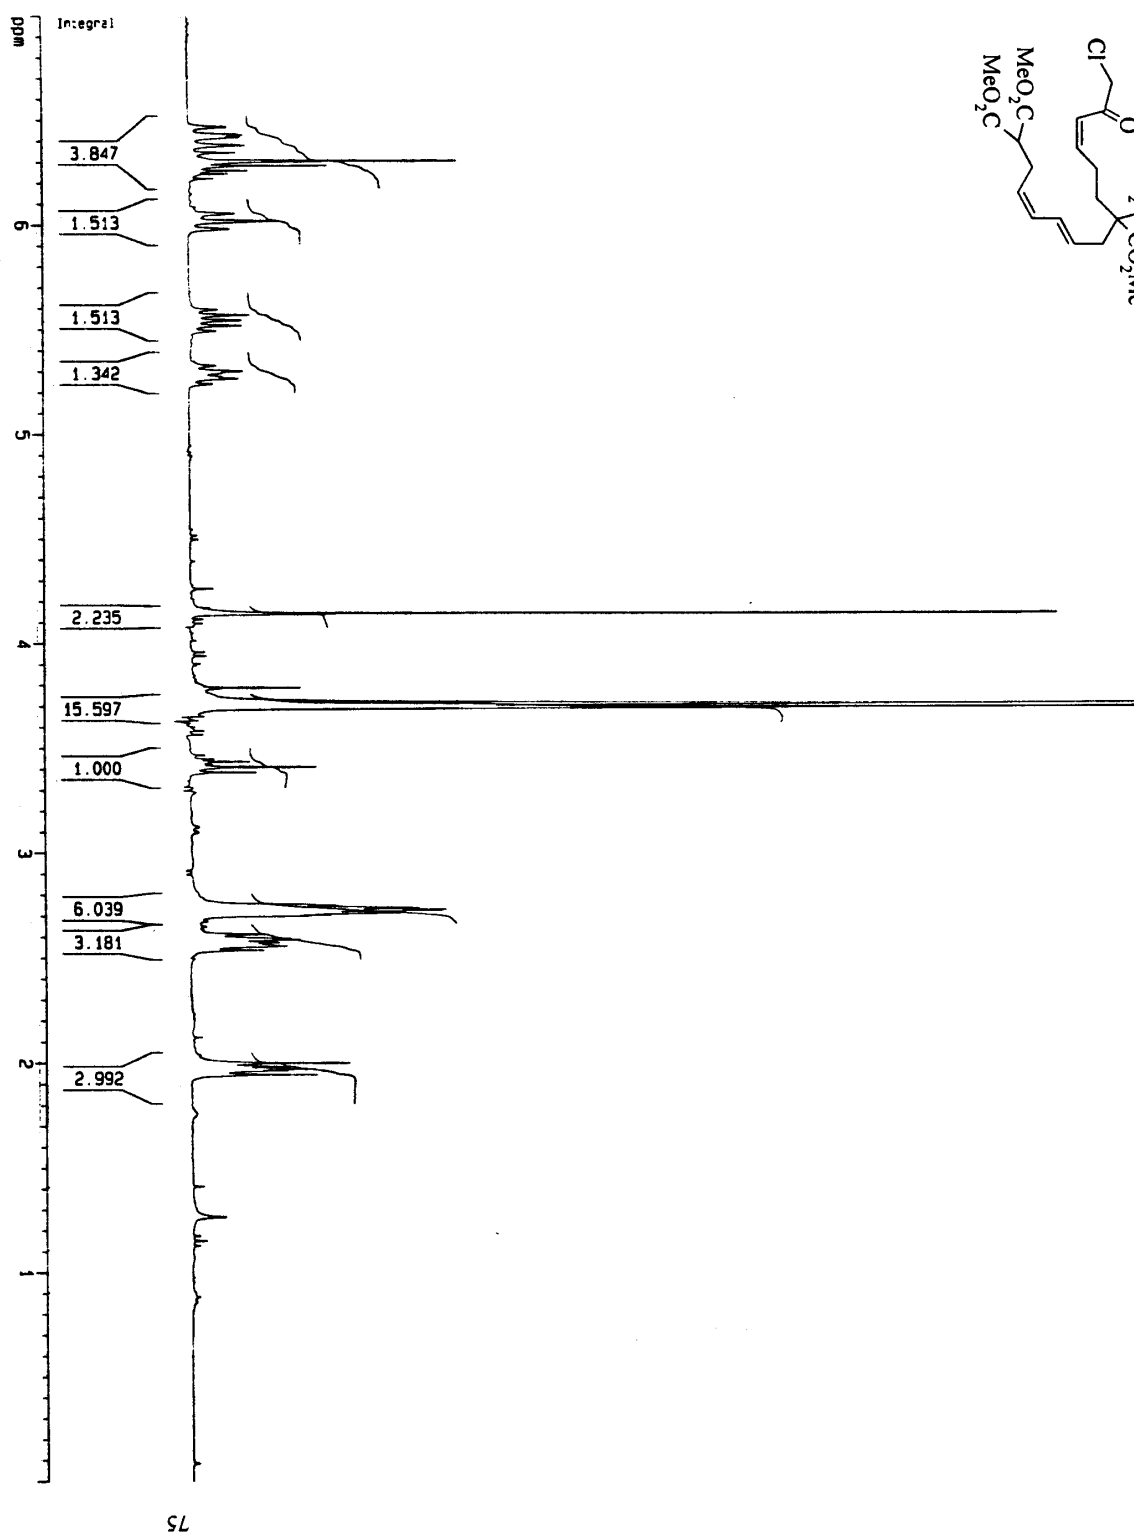

ppm 26

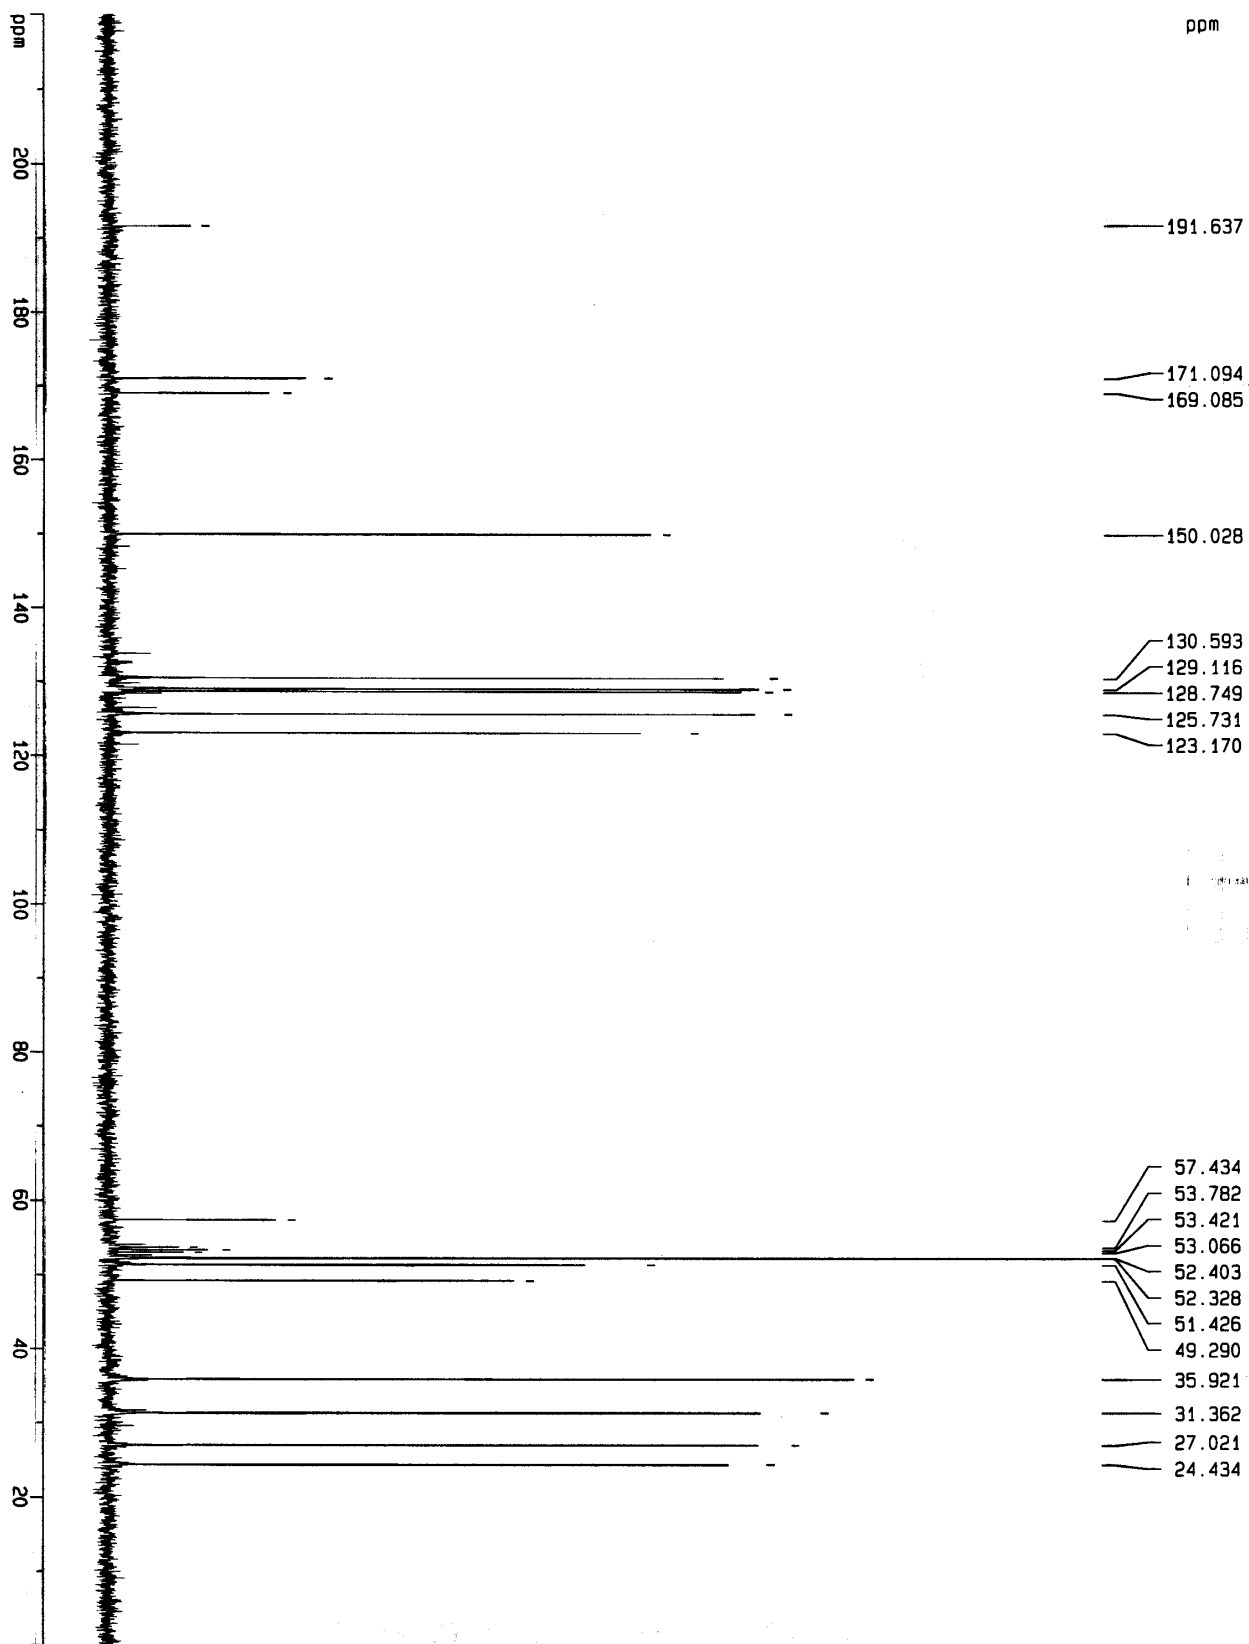

27

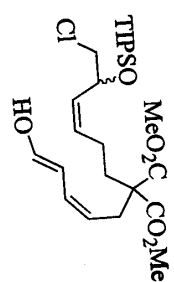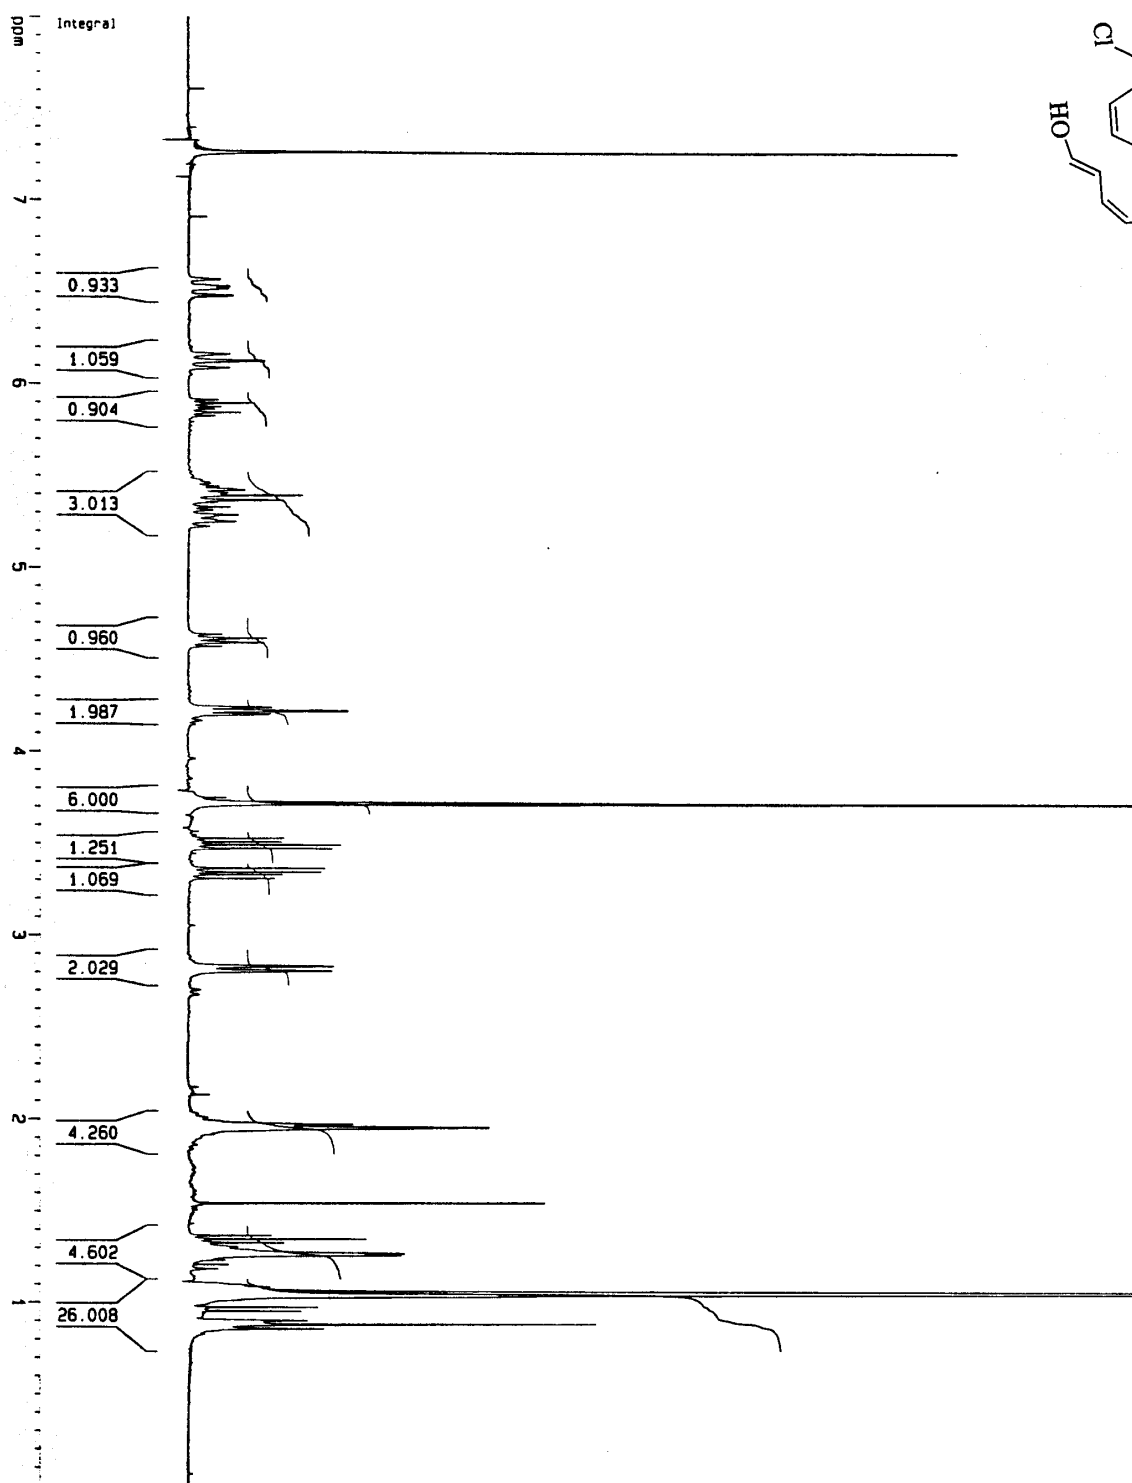

18

27

ppm

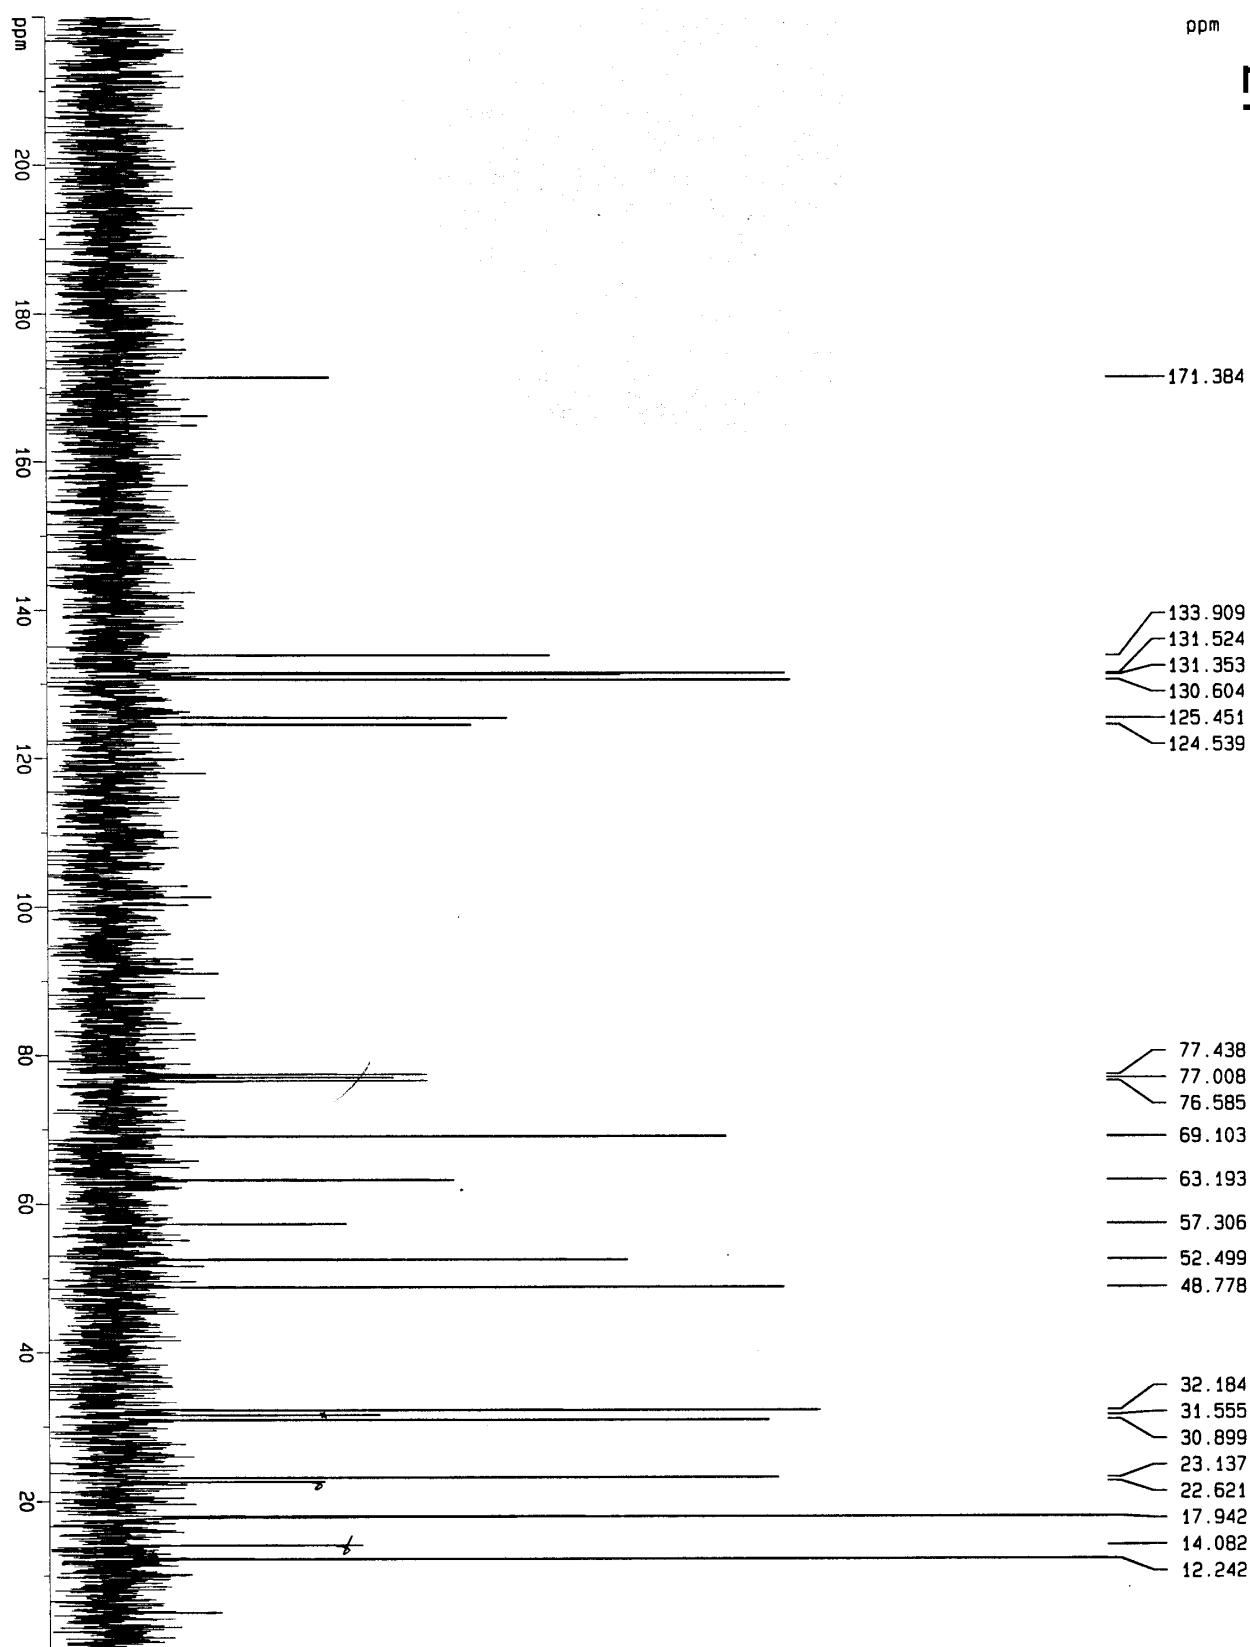



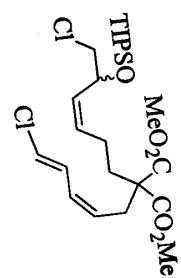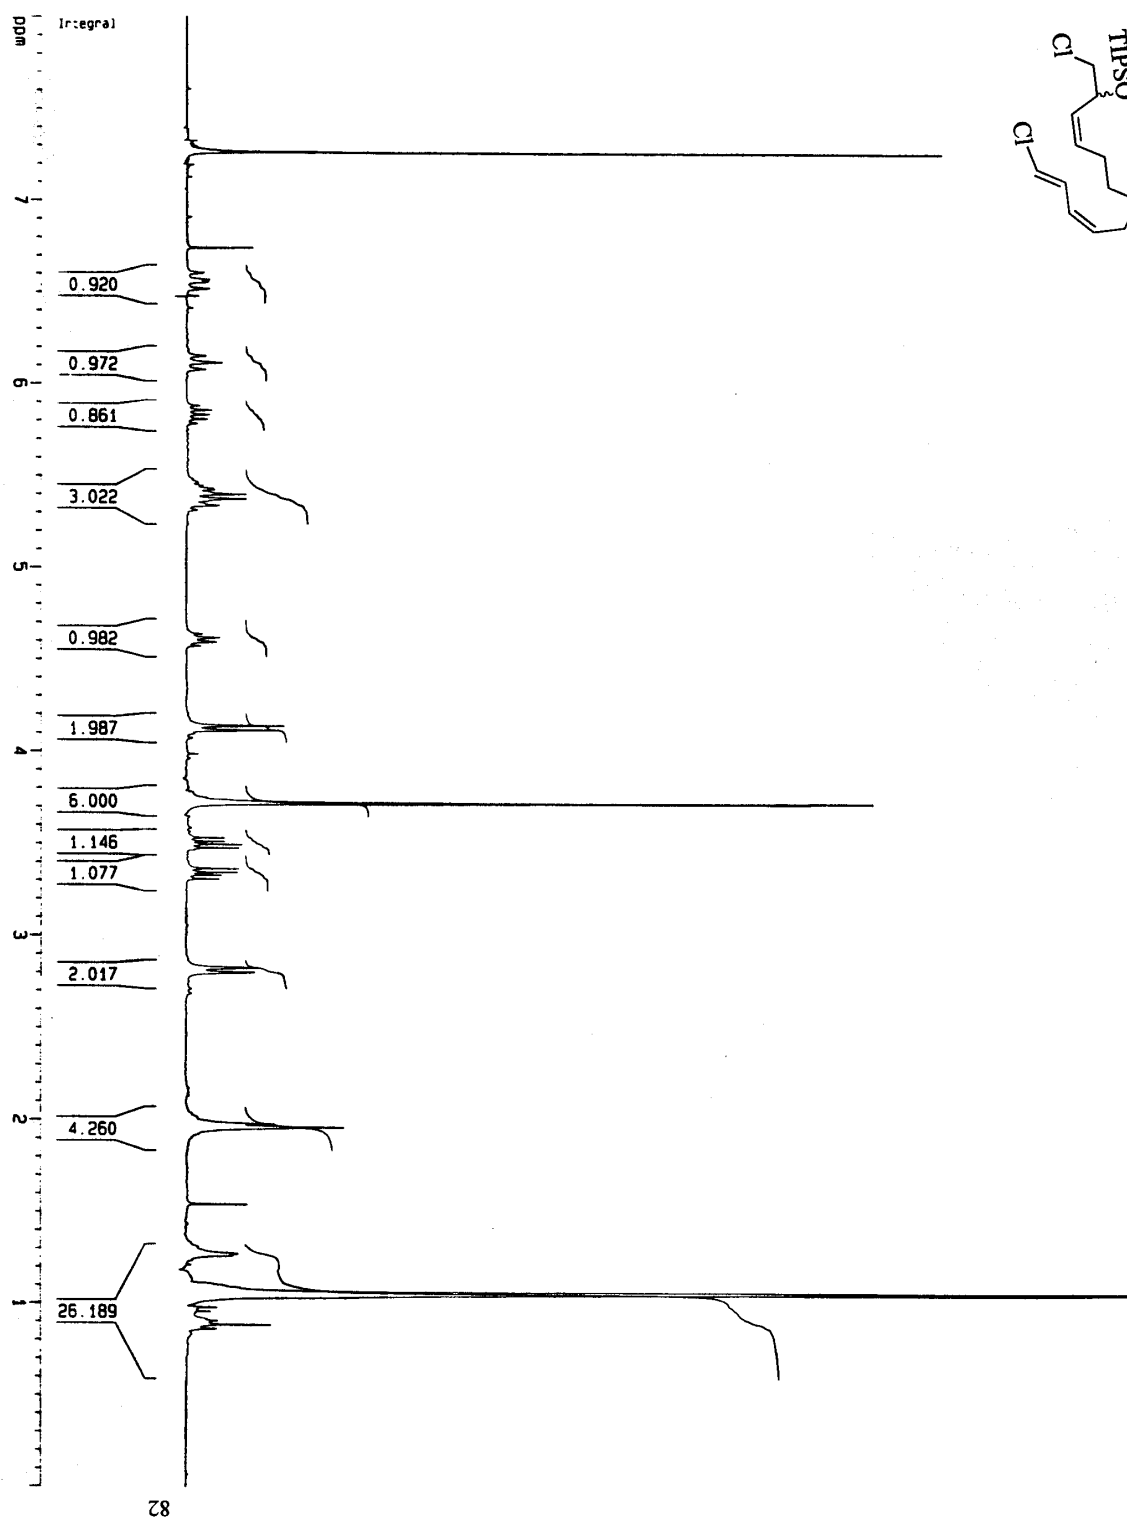

28

ppm

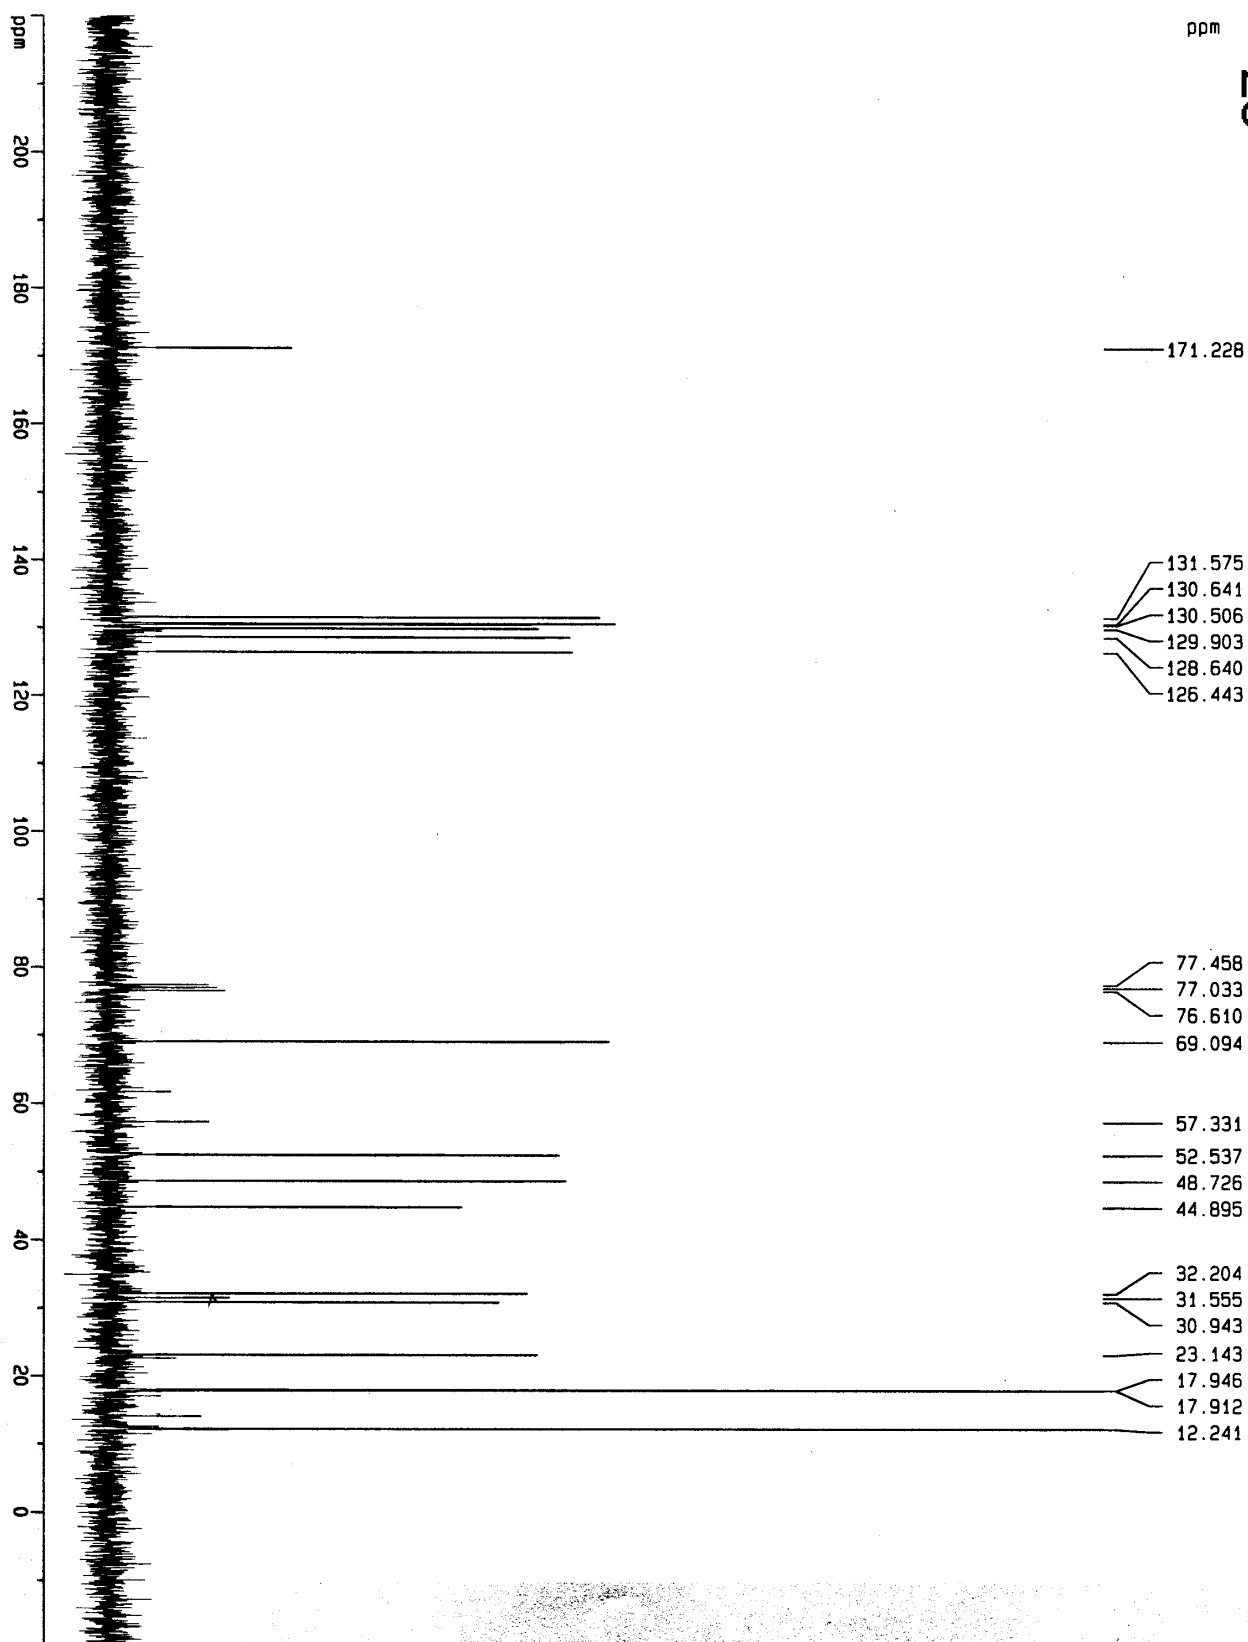

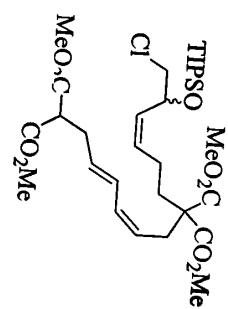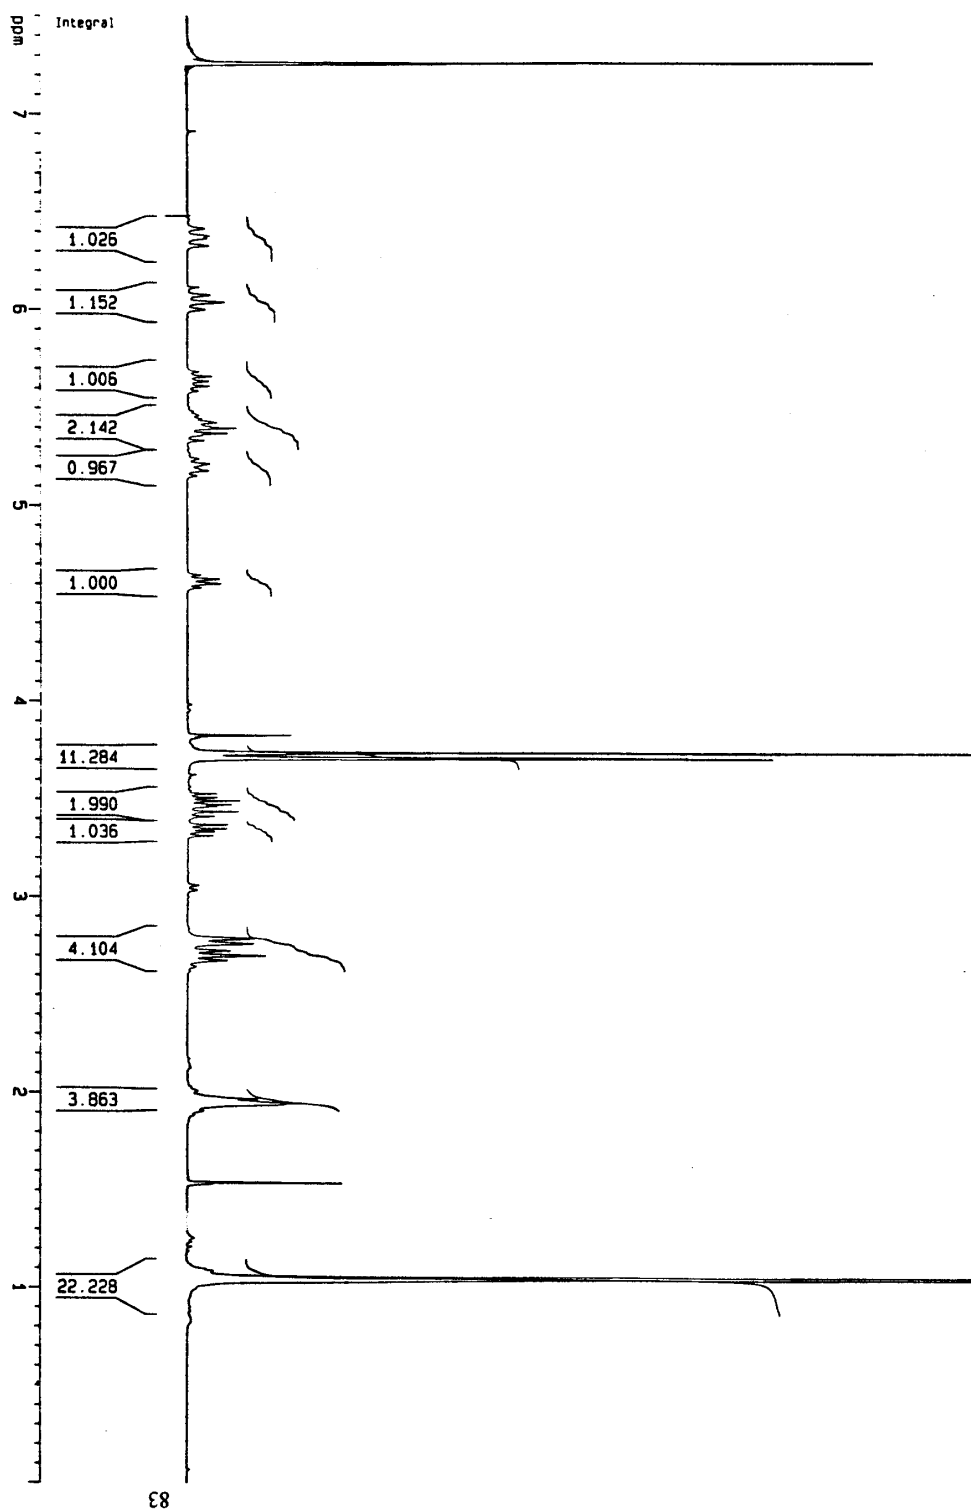

29

ppm

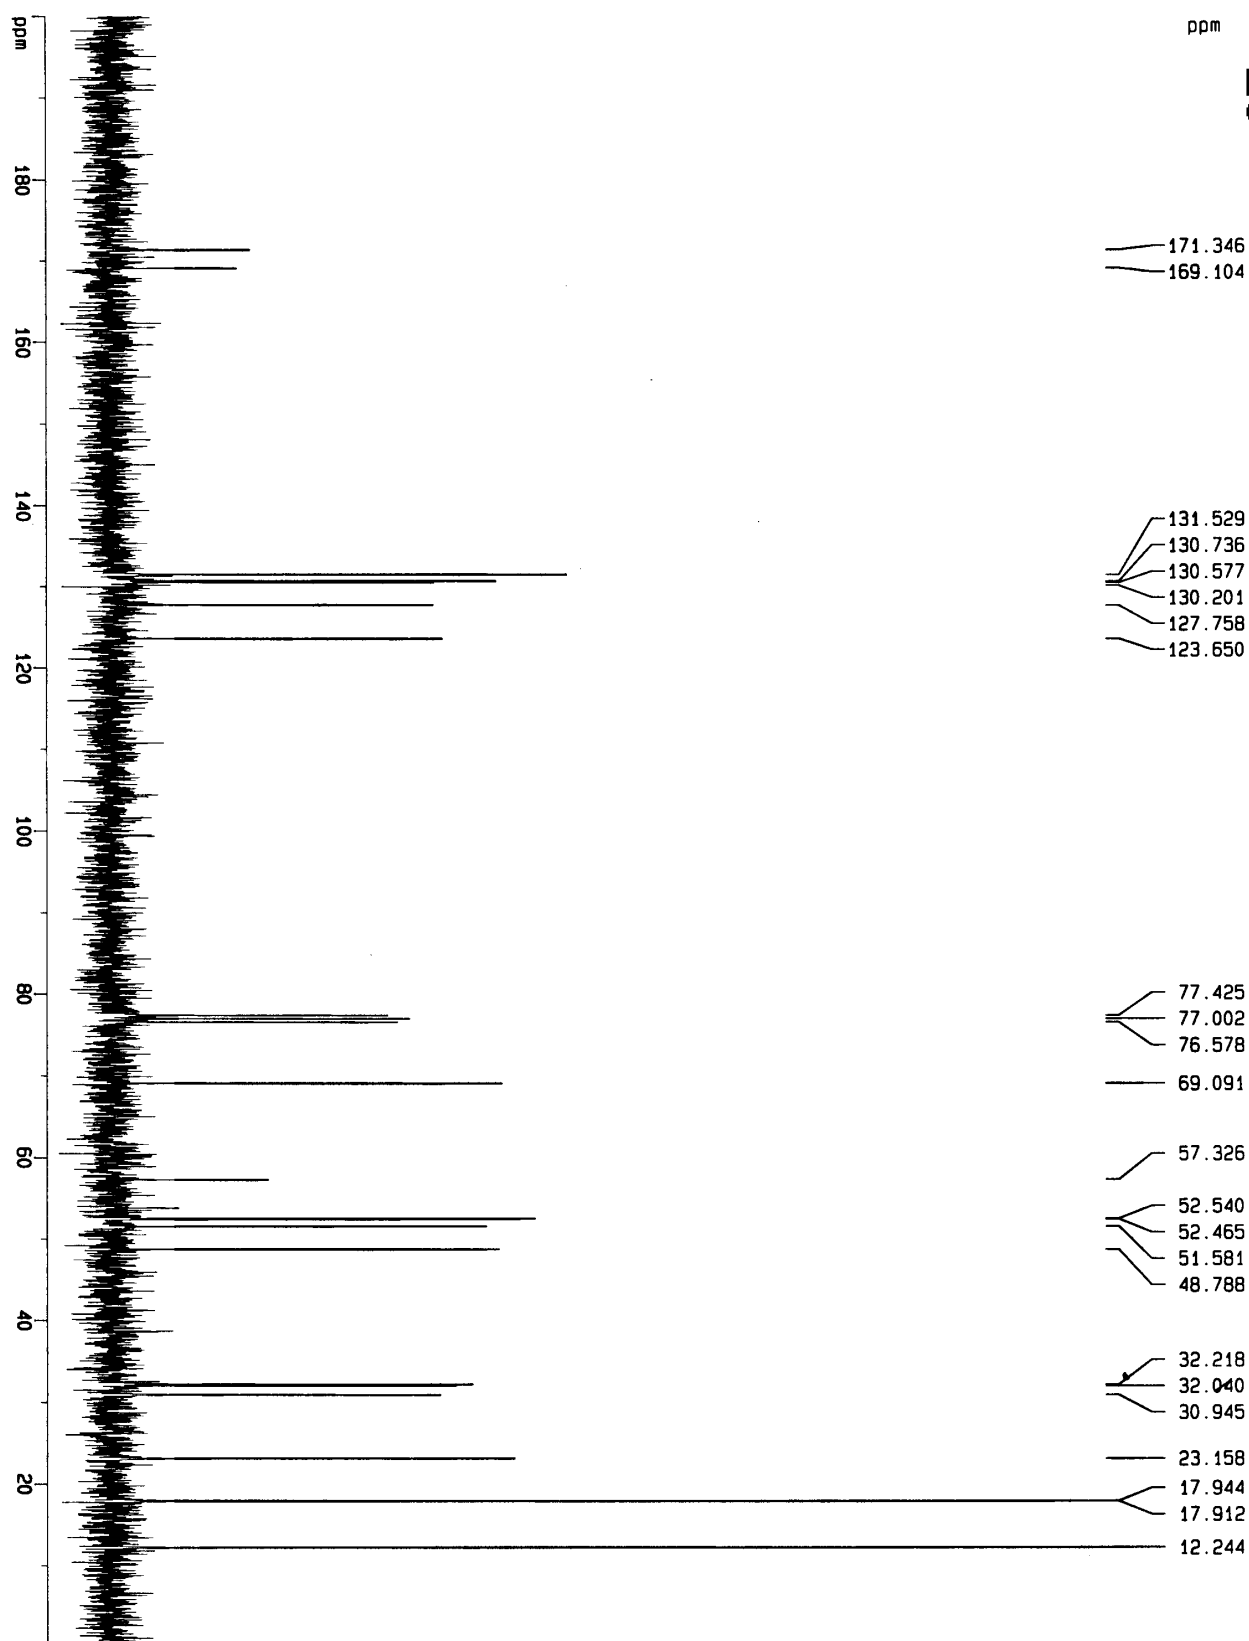

30

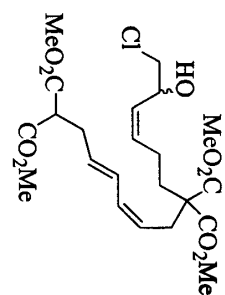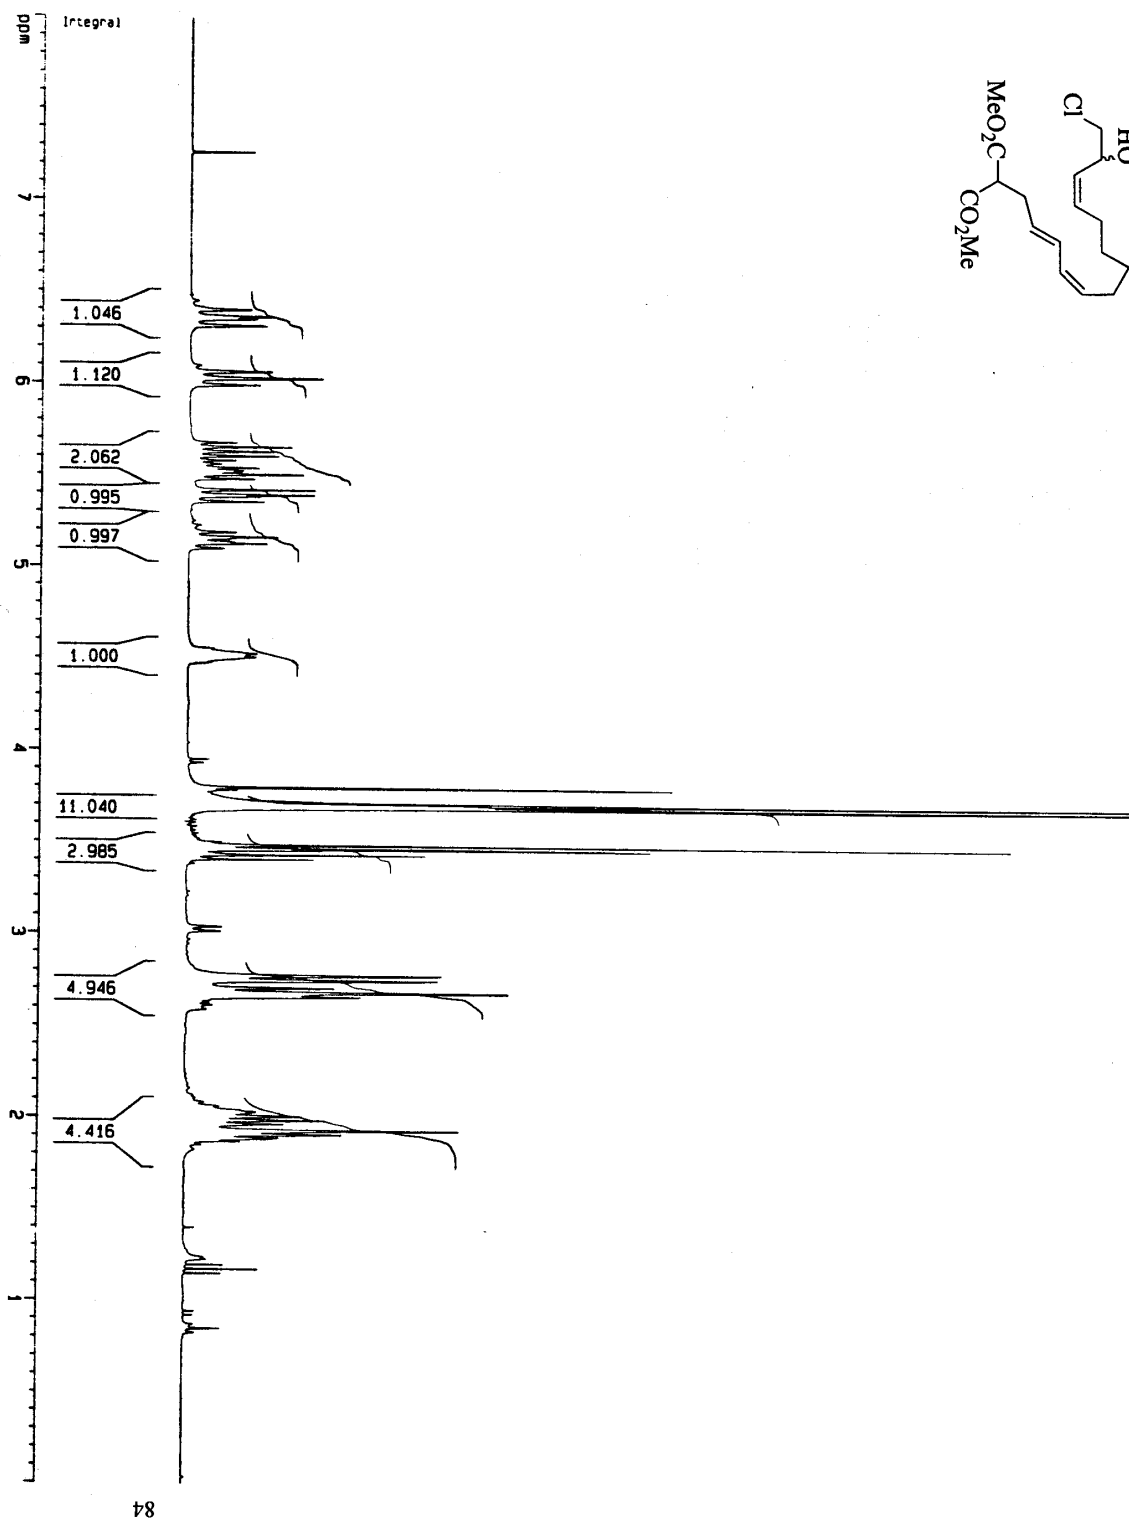

84

30

ppm

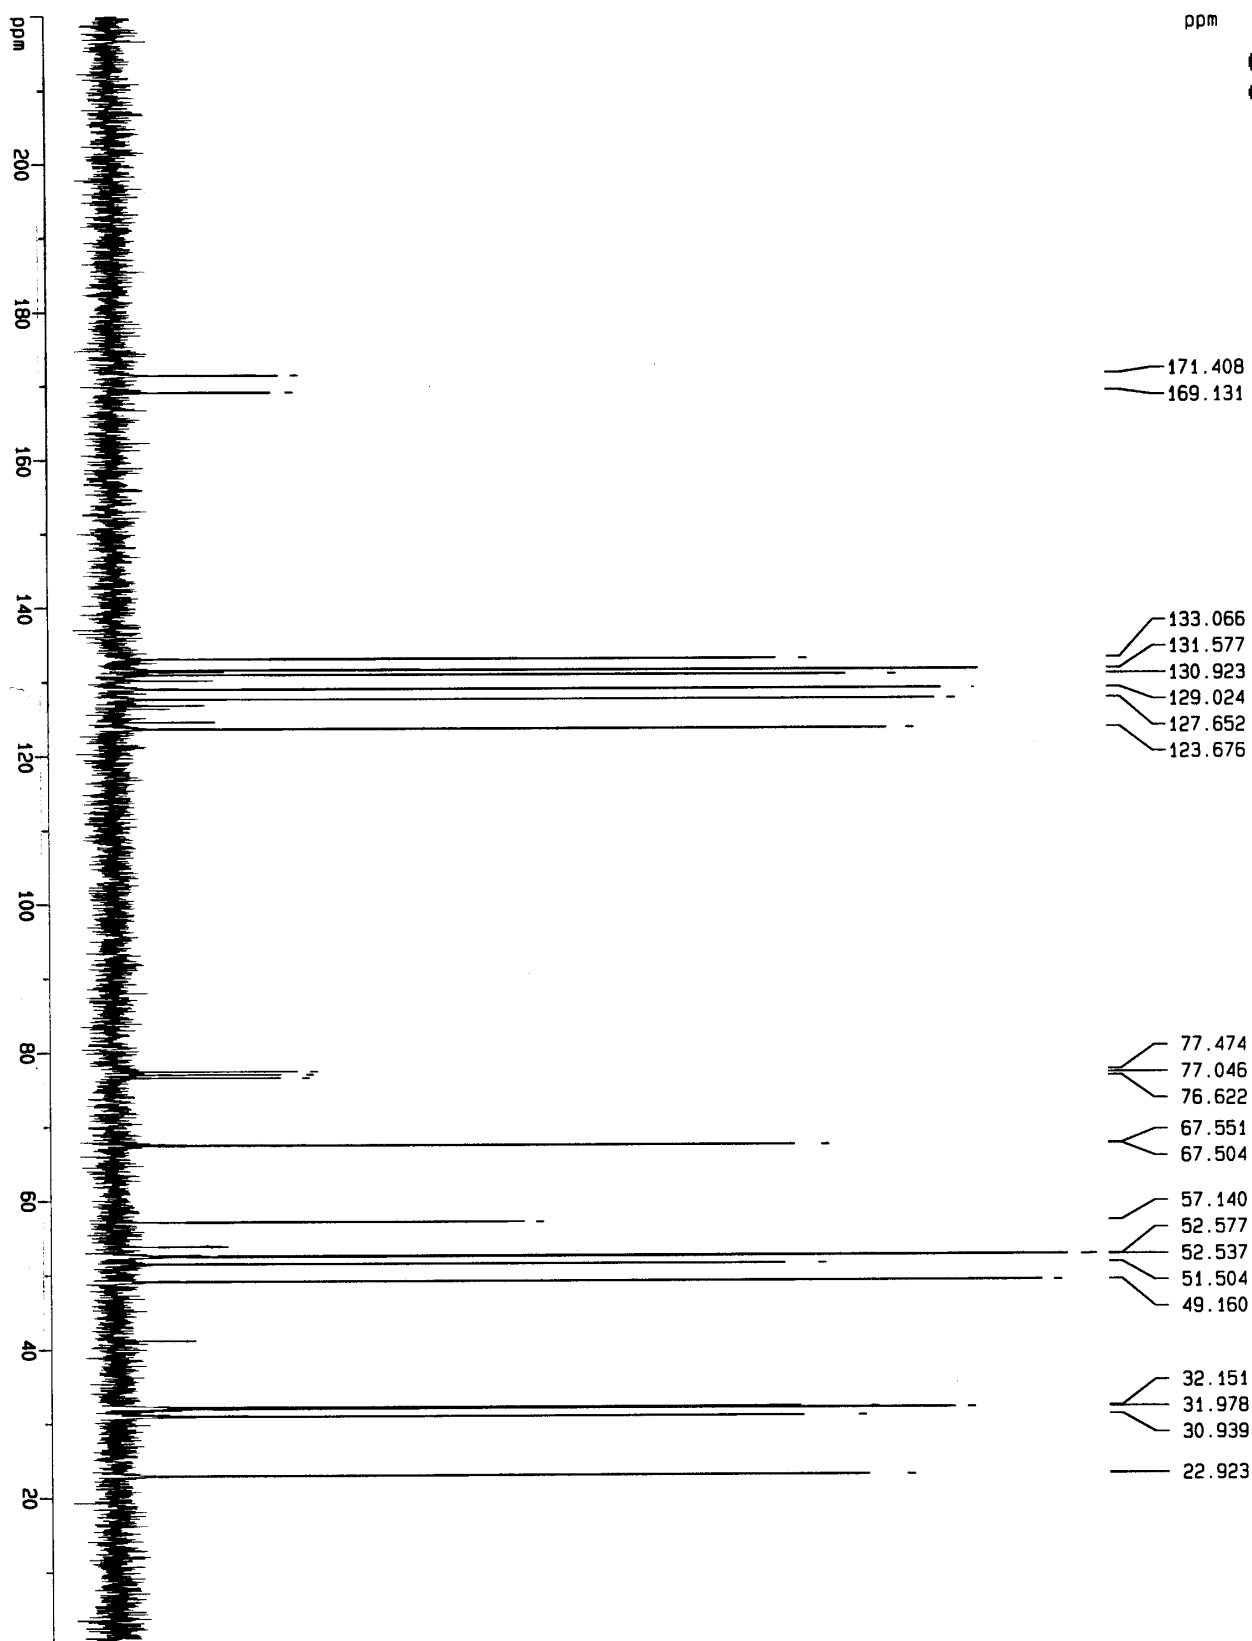

31

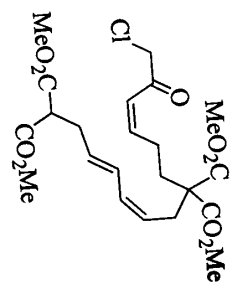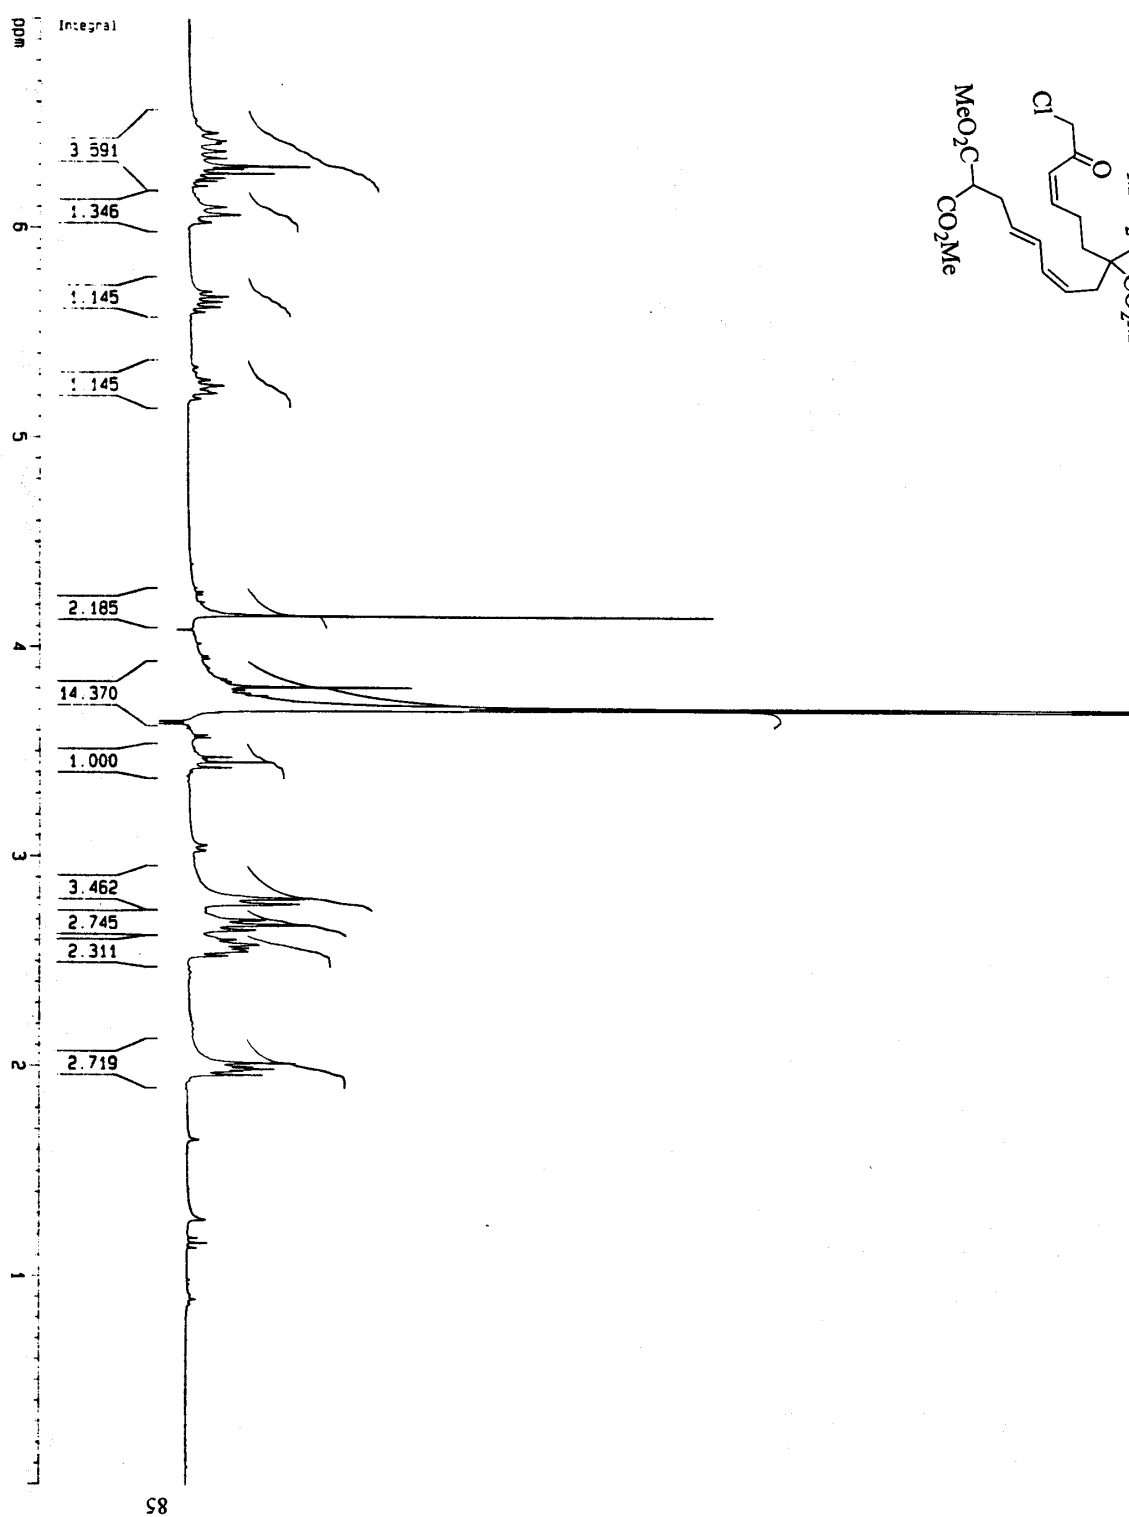

31

ppm

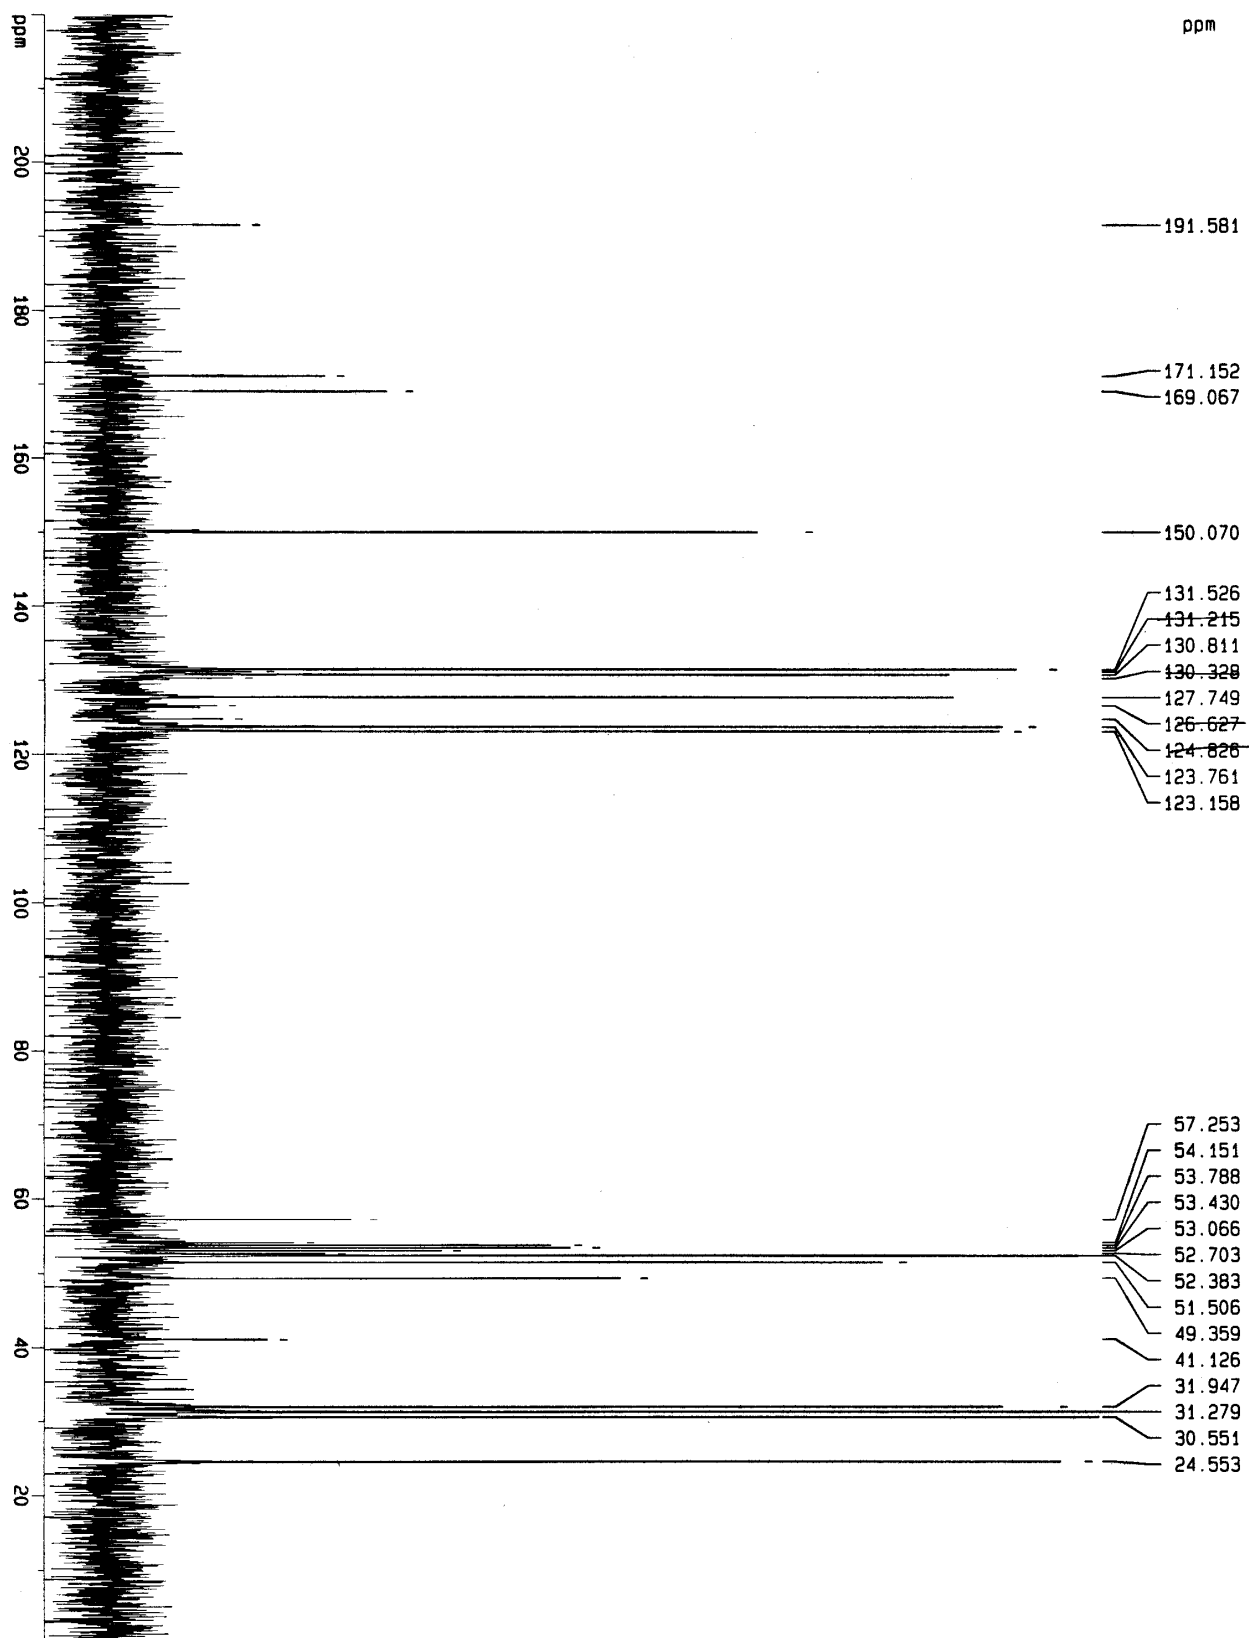



2

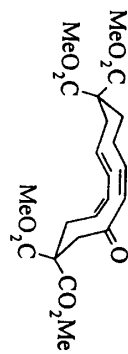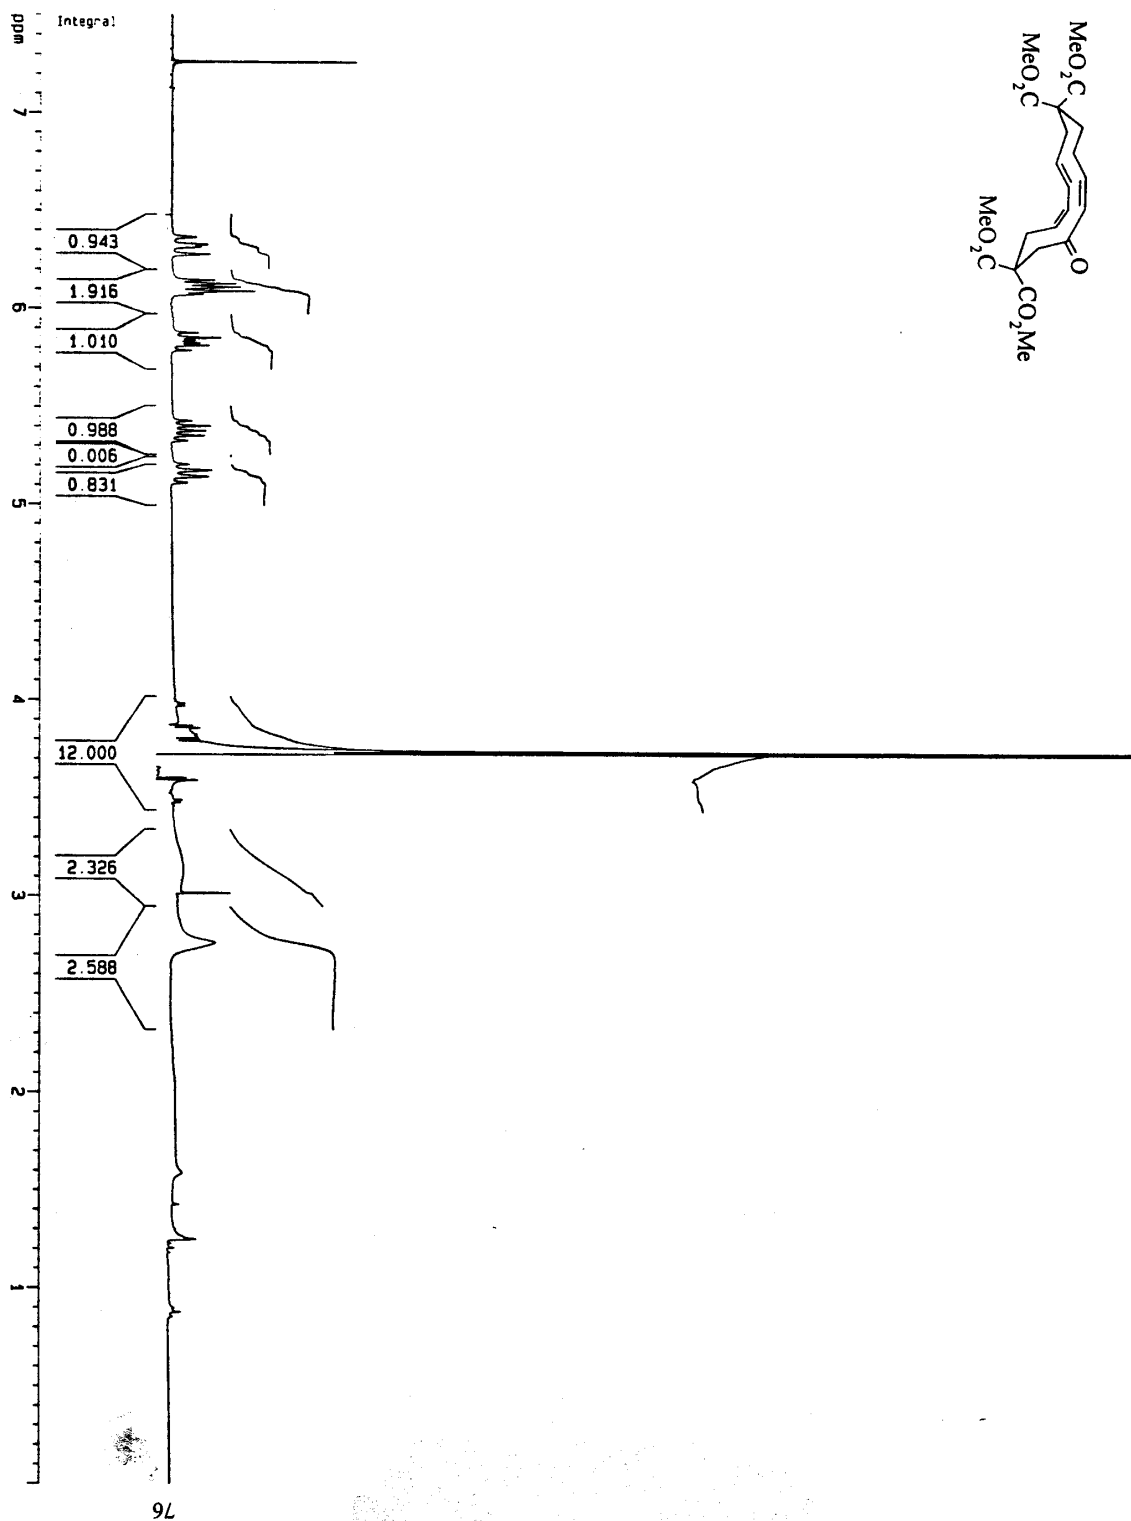

2

375K

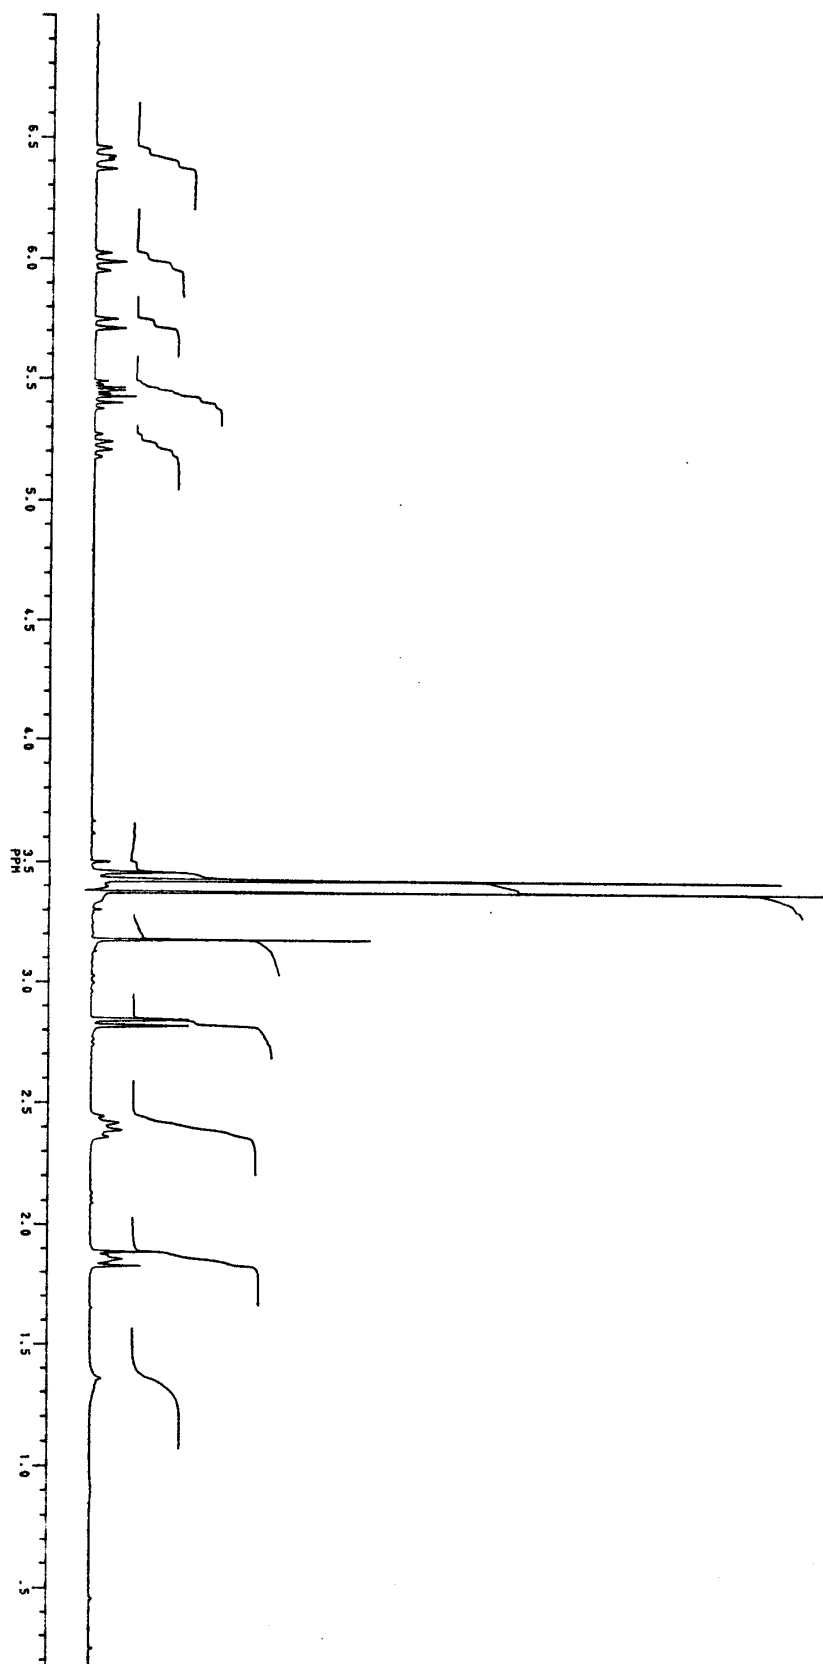

77

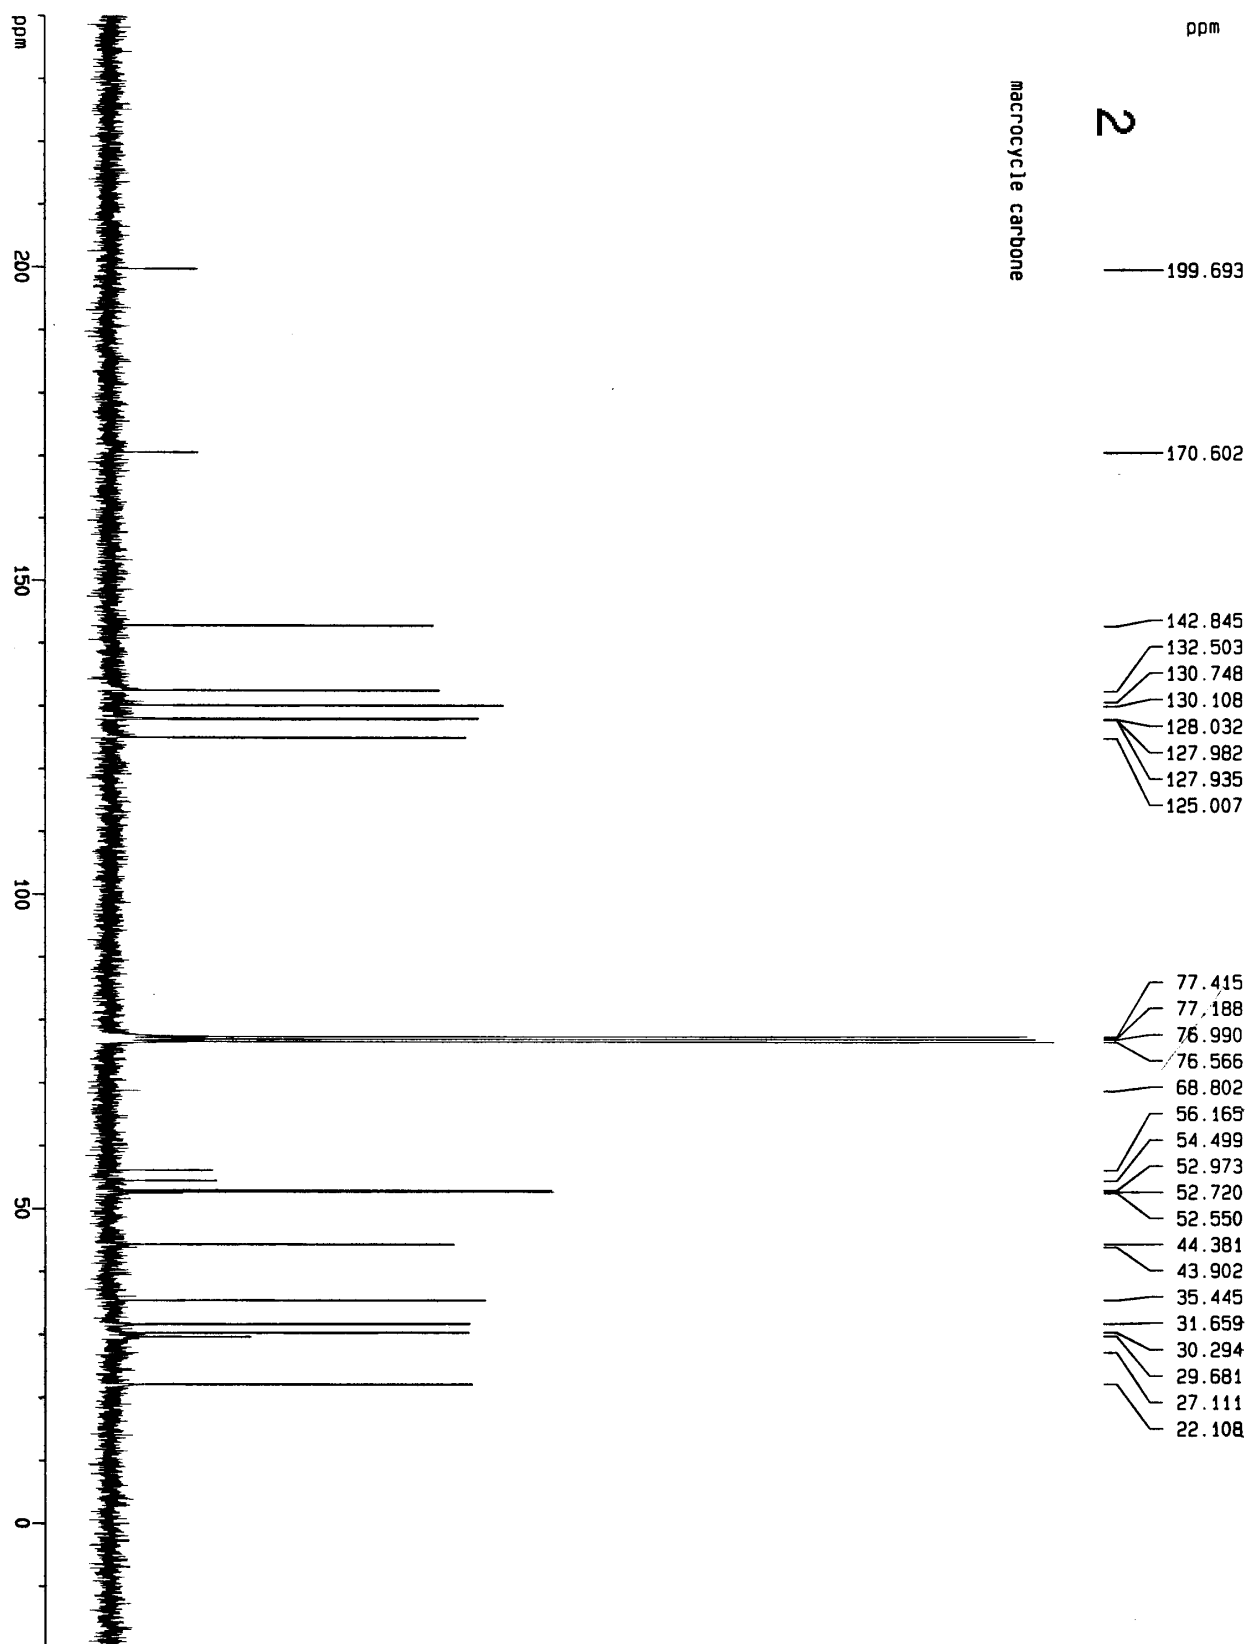

3

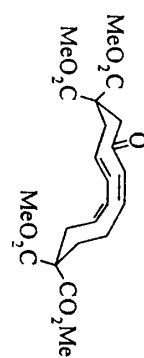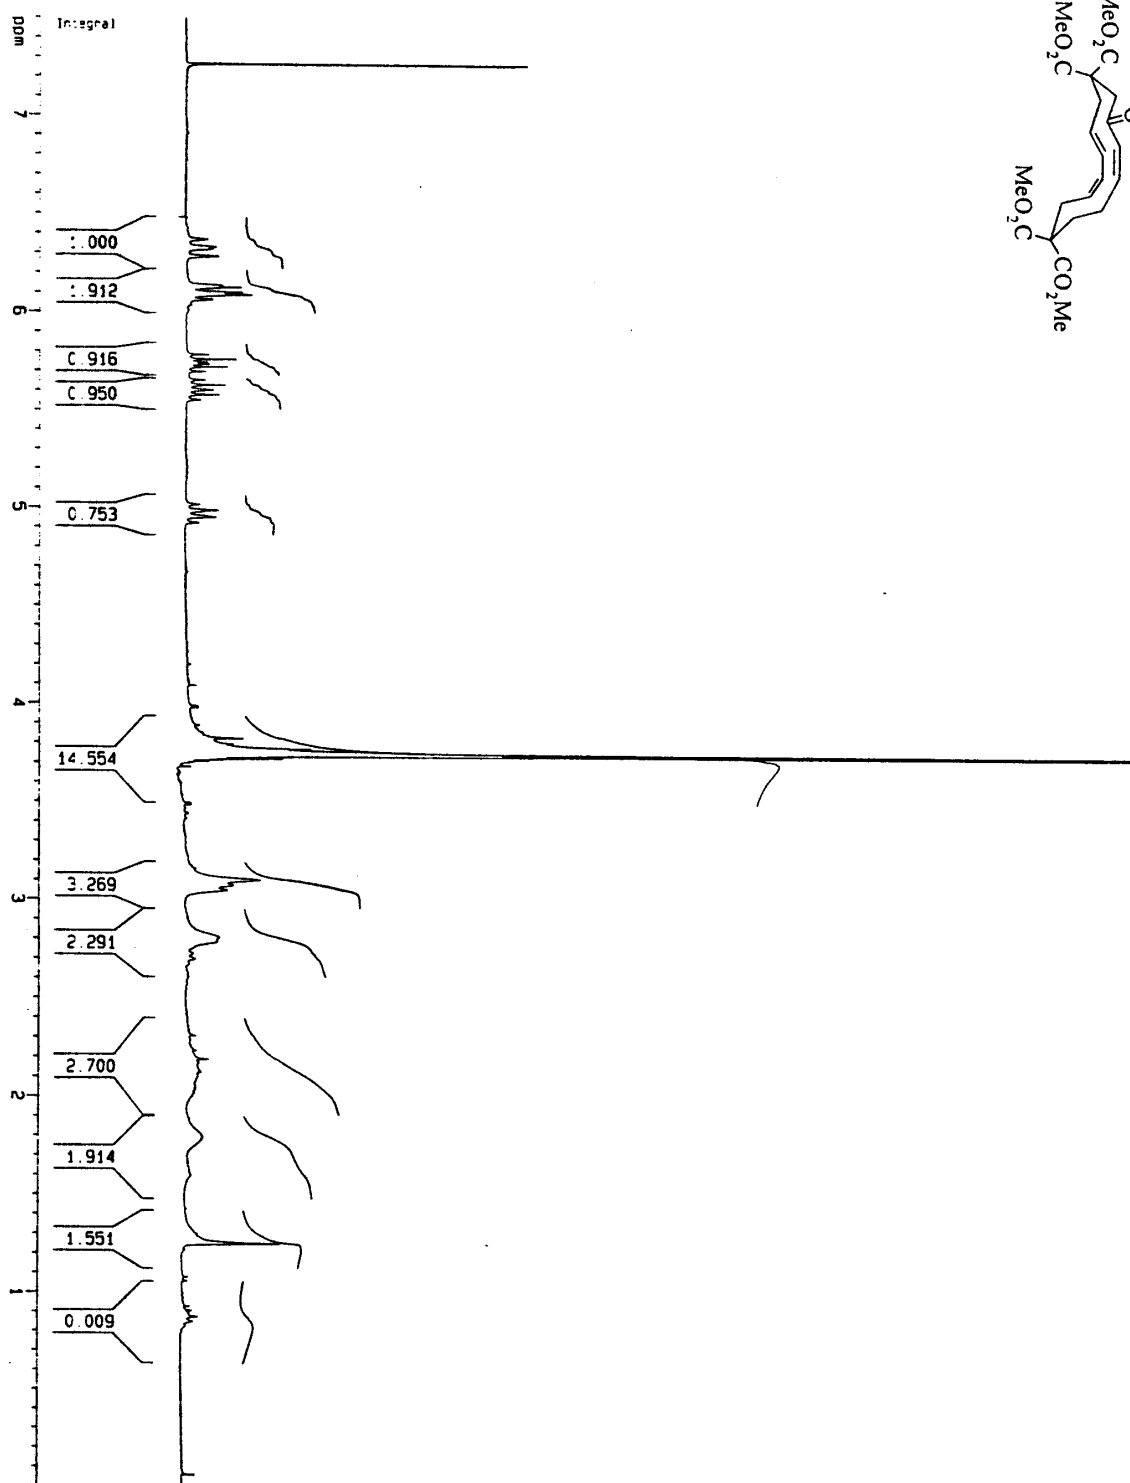

ppm

3

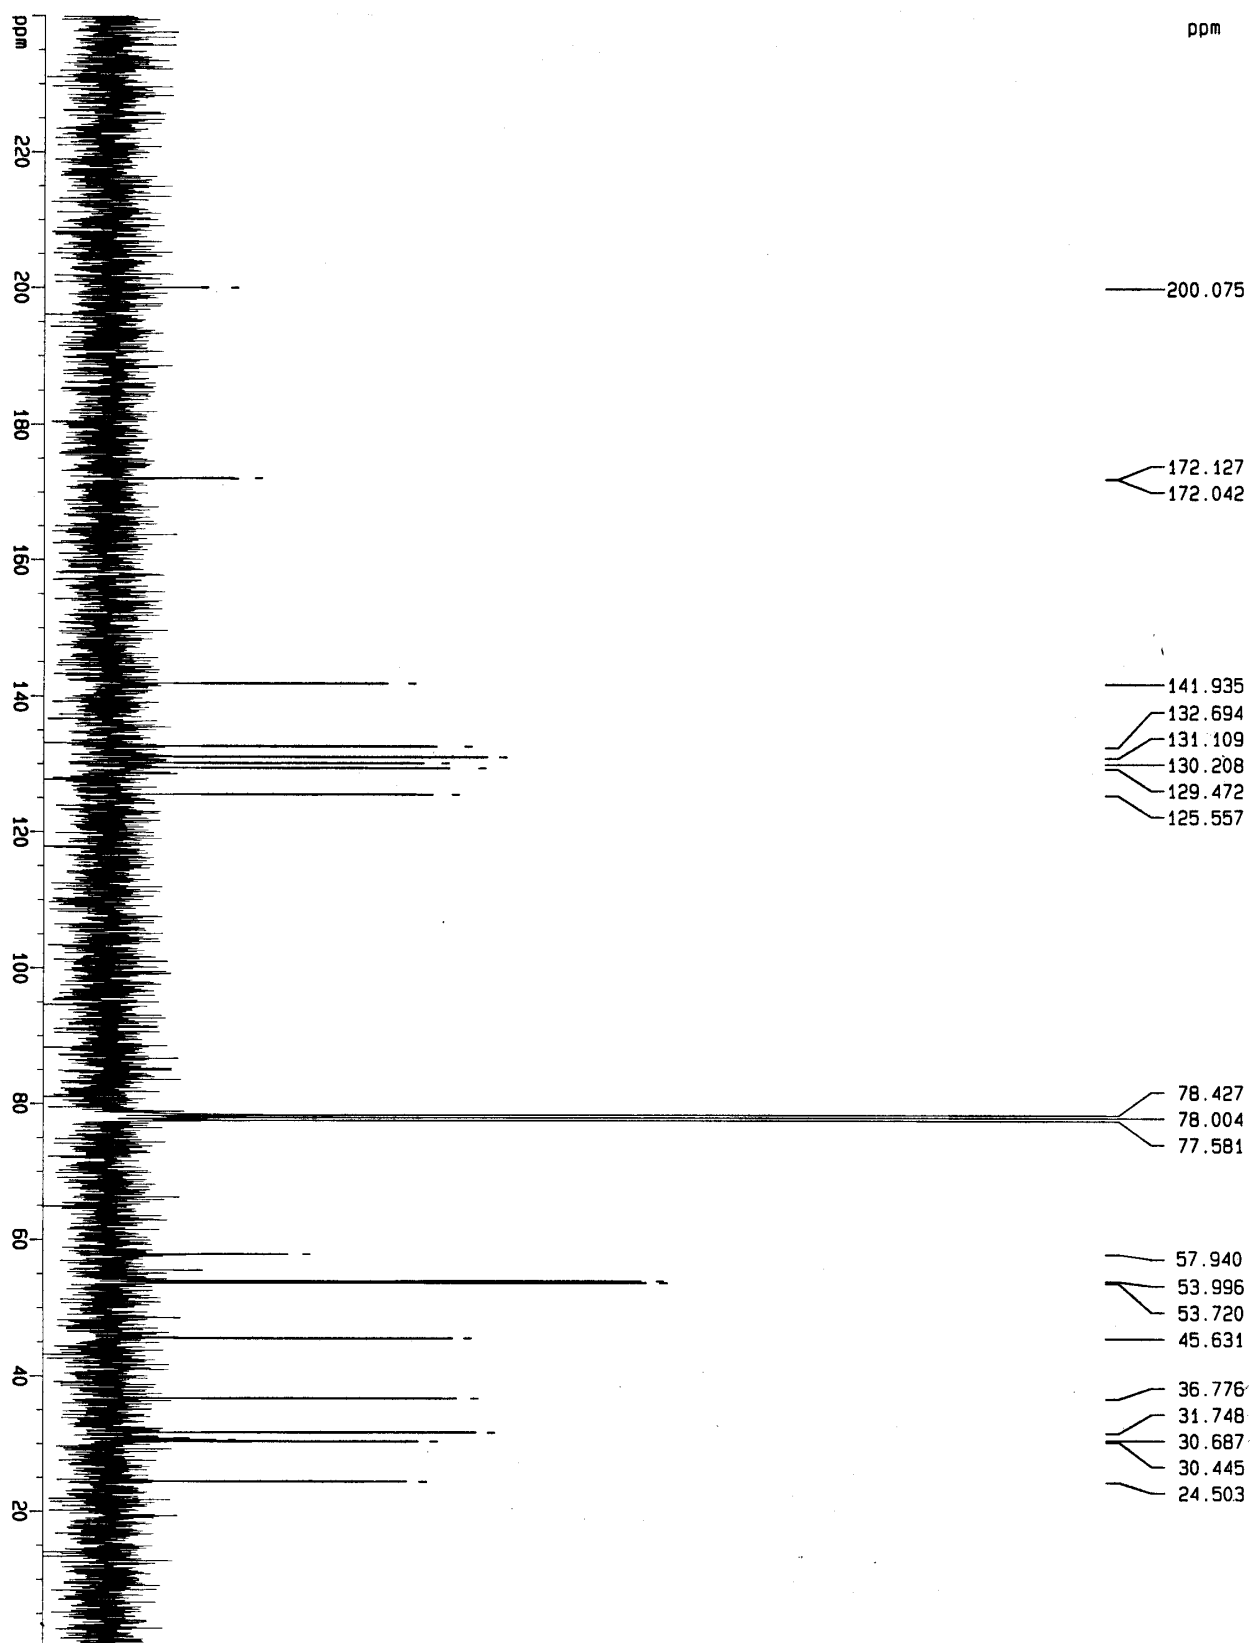

## Mixture of 33 & 34

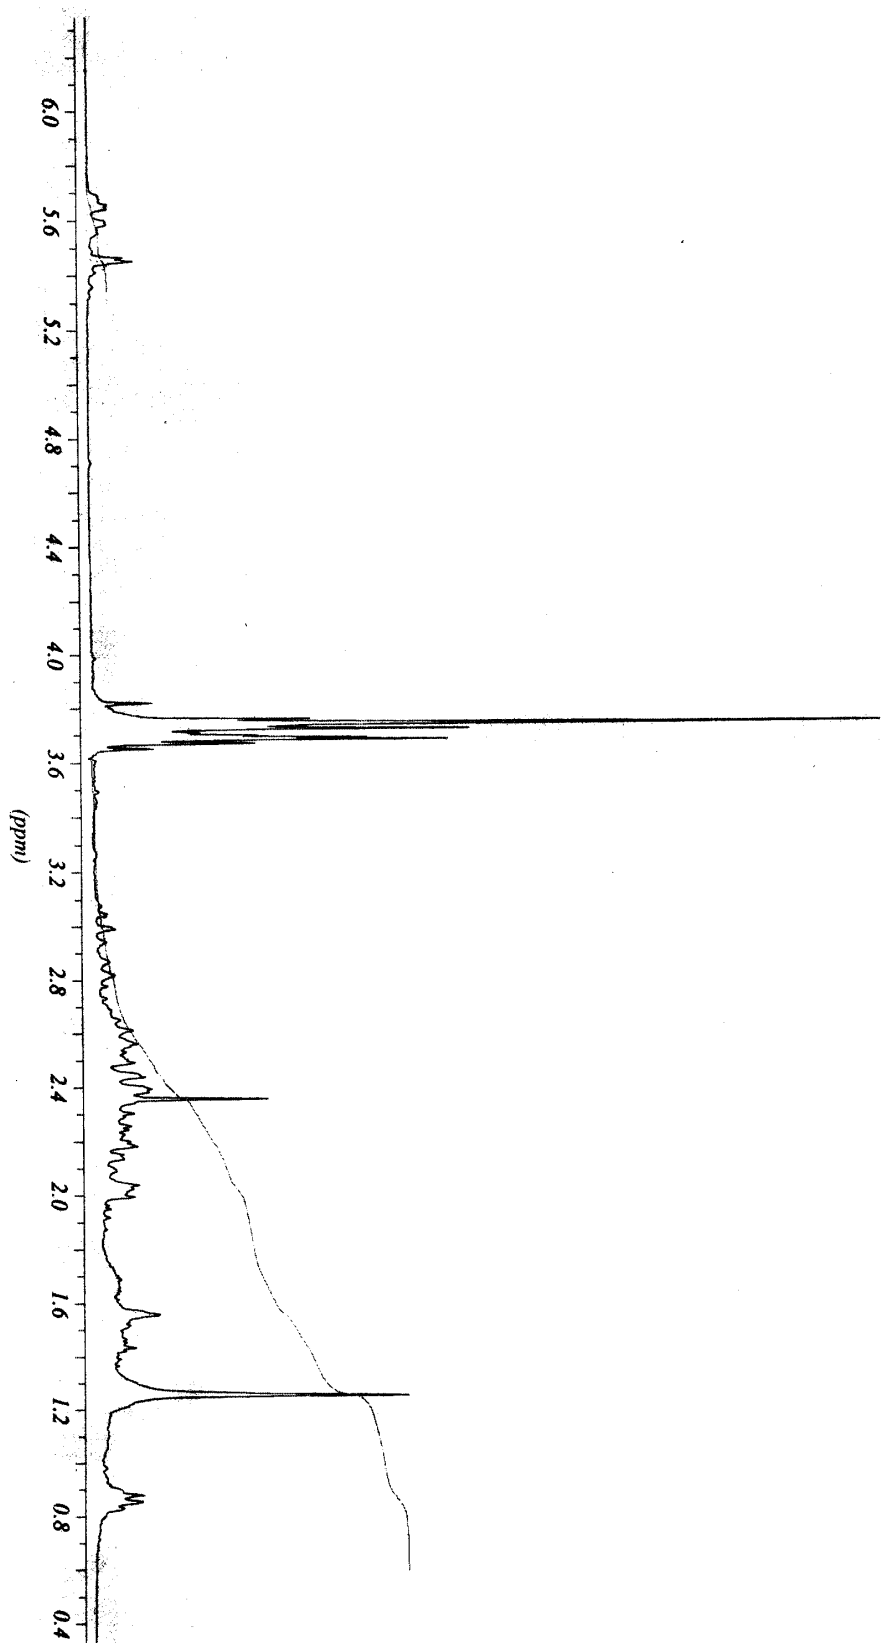

34

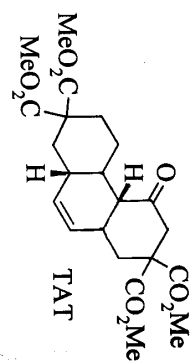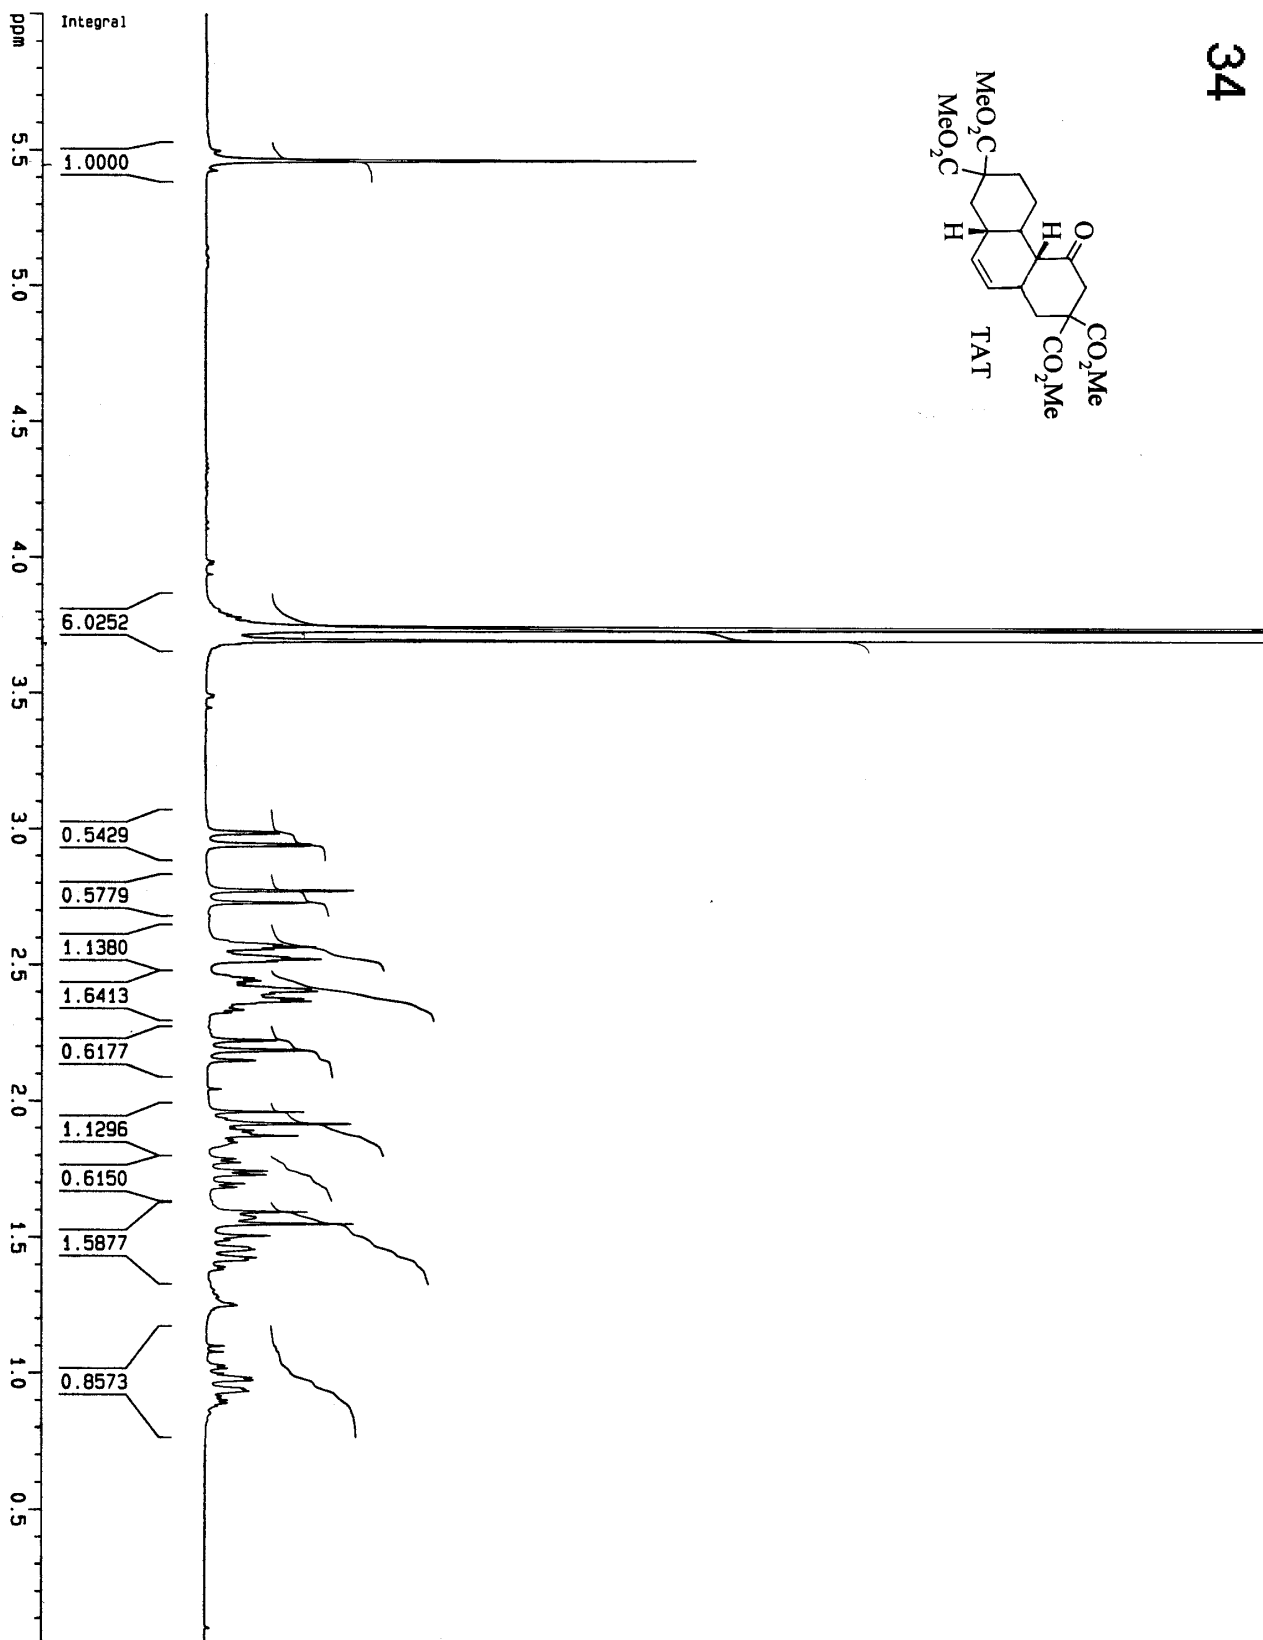

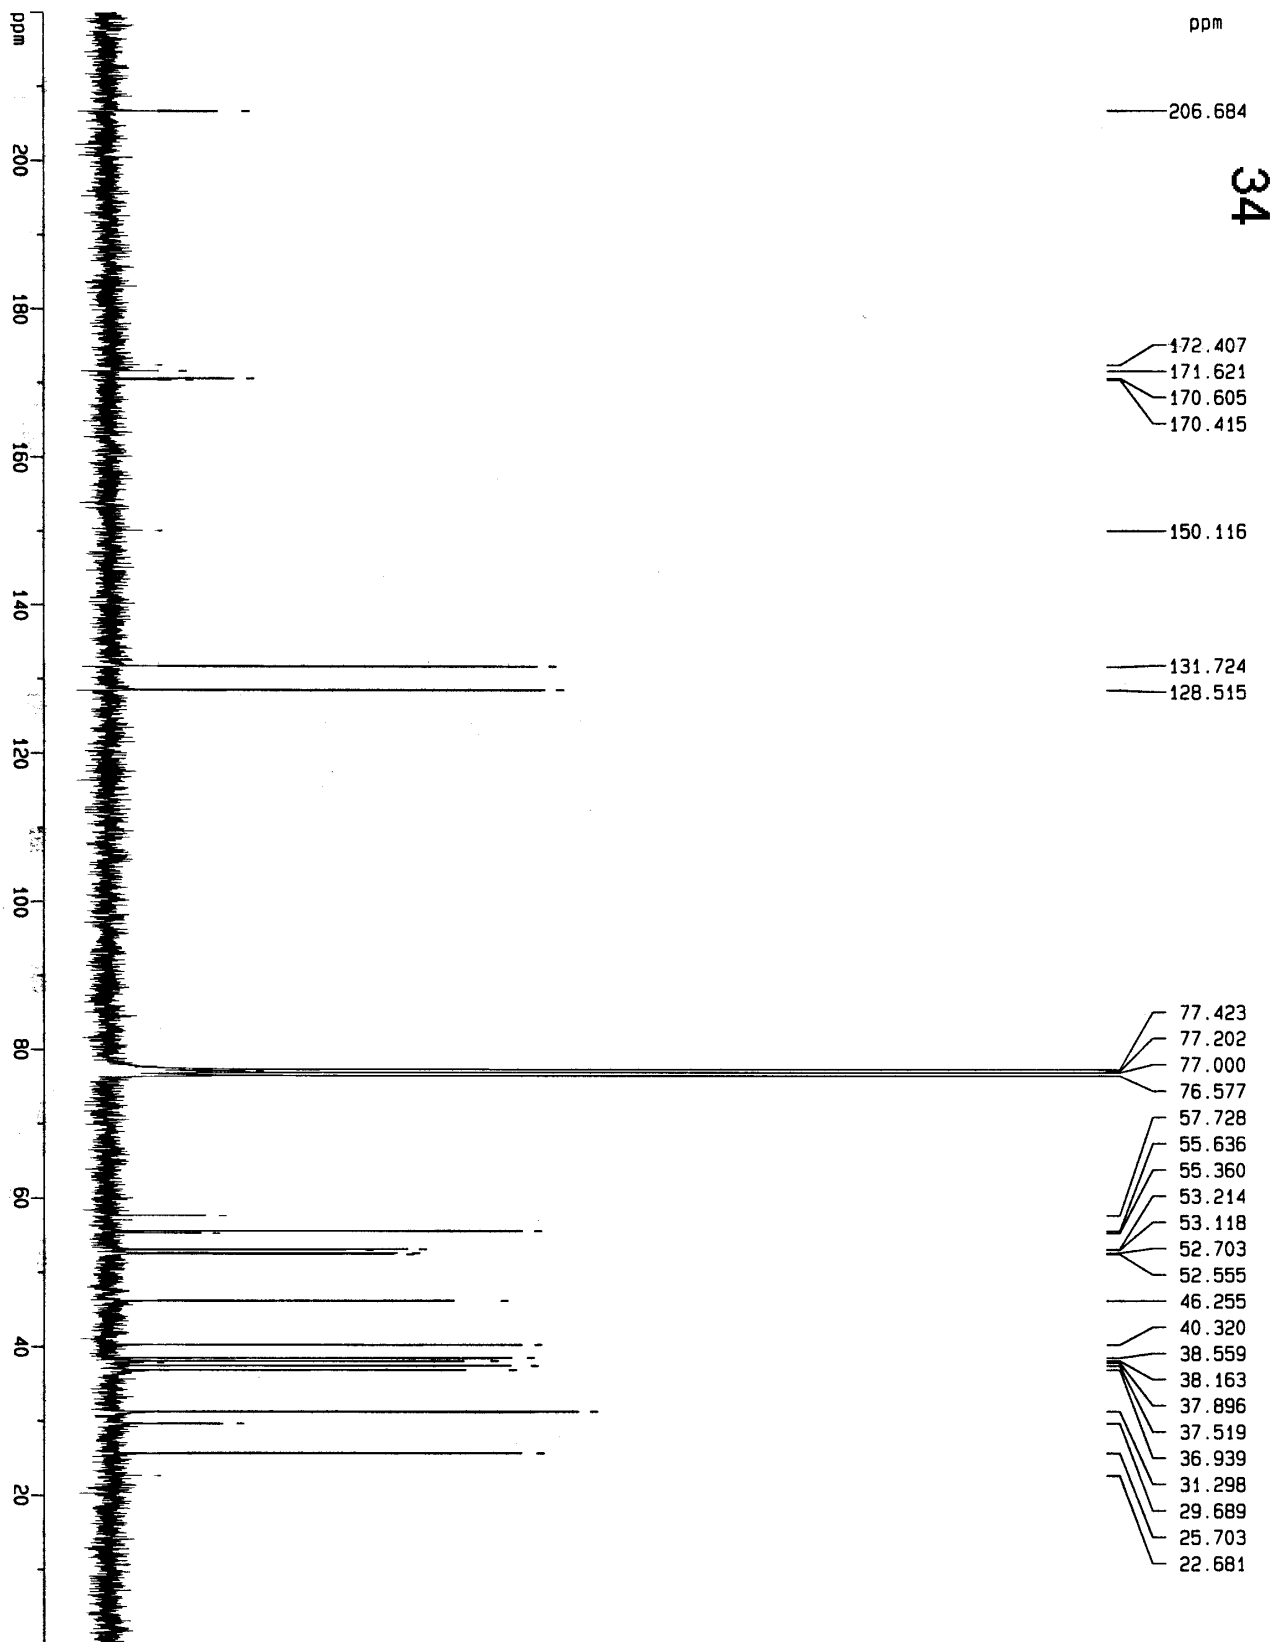



# Mixture 35 & 36

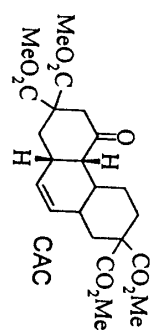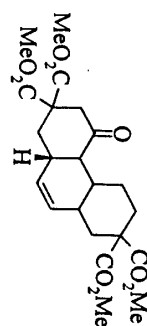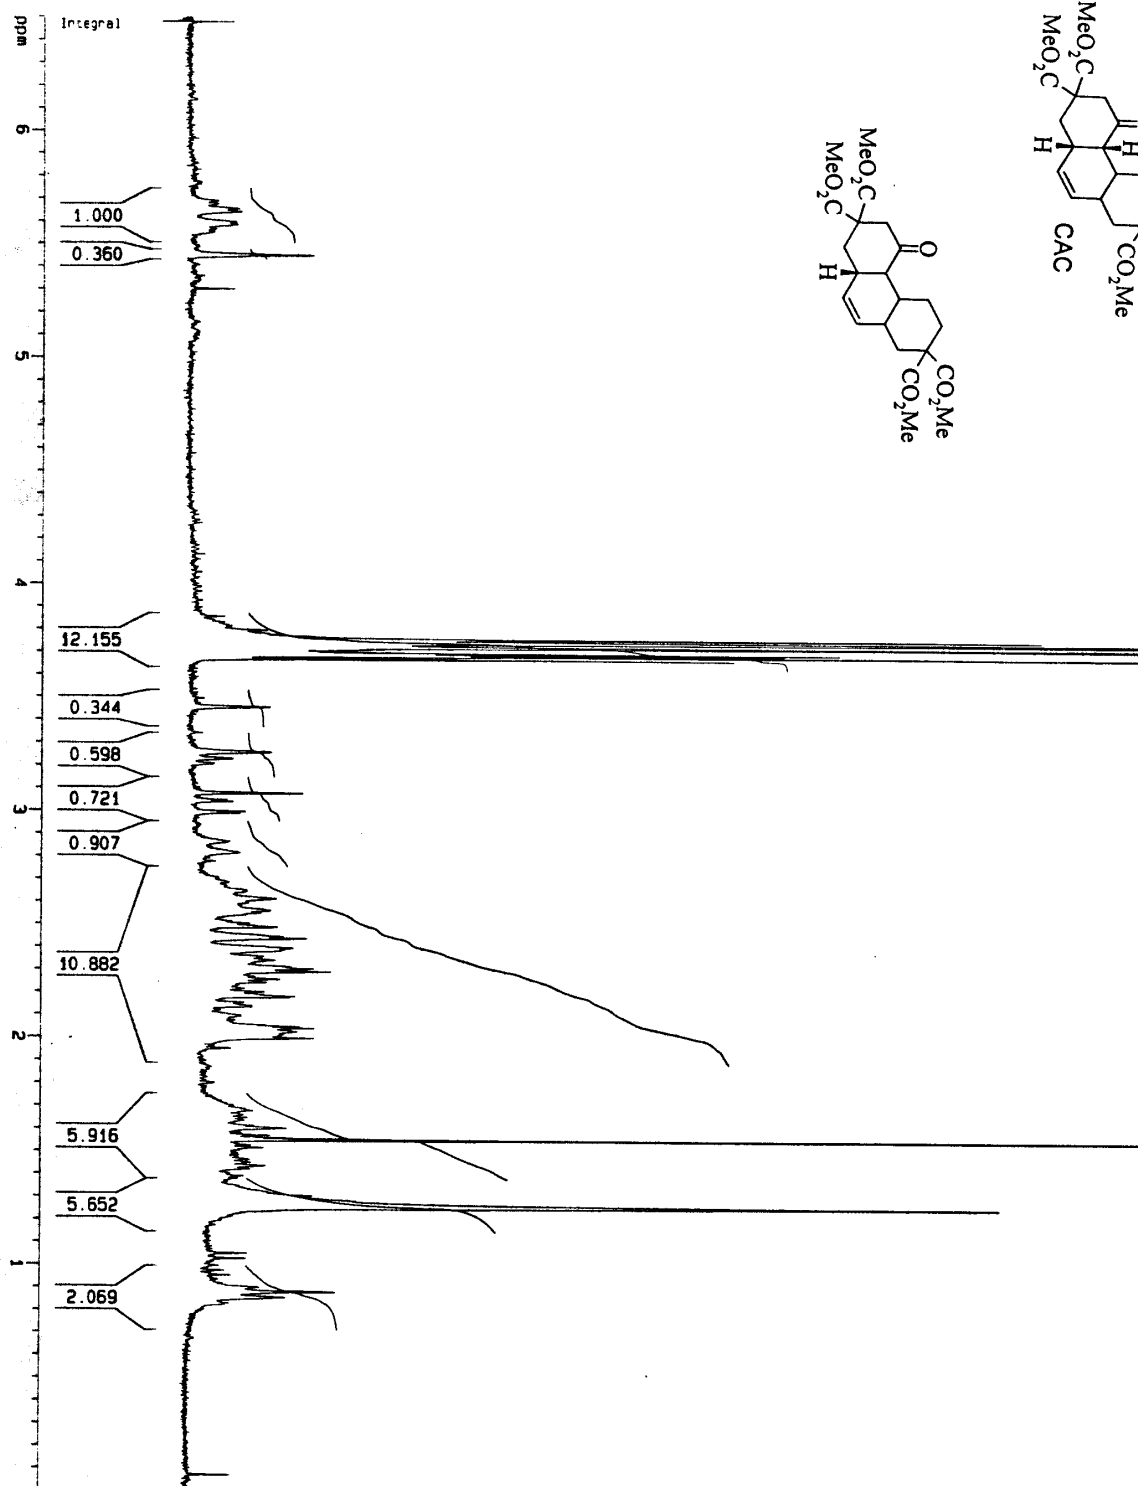

35

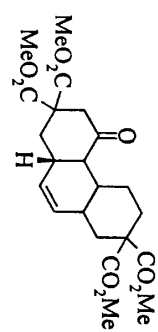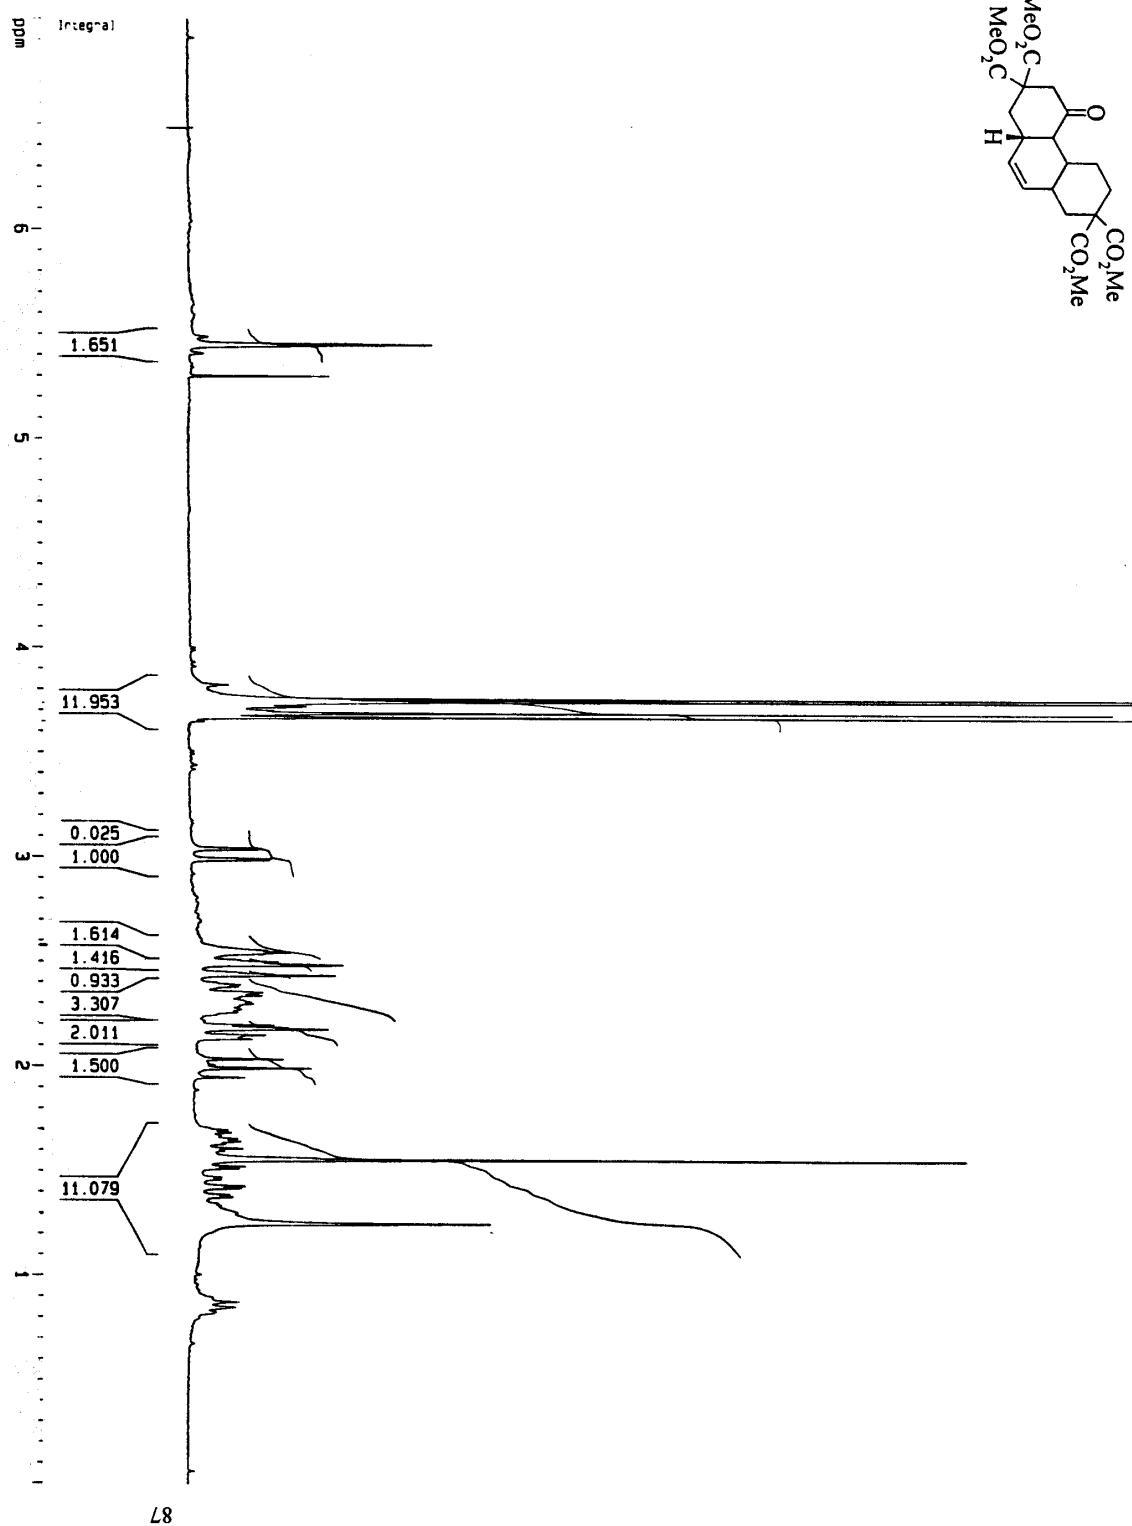

36

```
mac M1 -539.9083443 au
C      2.502002   -1.685880   .660848
C      1.285935   -2.173190   -.084554
C      .040757    -1.891382   .260453
C     -1.137248   -2.288422   -.517118
C     -2.372984   -1.842348   -.349566
C     -2.860190    -.831744   .661430
C      3.325327    -.675054   -.182384
C      2.512115    .540904   -.669568
C      1.973562    1.431332   .476345
C      1.214982    2.613692   -.080914
C     -3.243866    .510608   -.016930
C     -2.037643    1.296258   -.571253
C     -1.161247    1.934307   .535899
C     -.088991     2.817698   -.060840
H      3.144585   -2.527073   .906719
H      2.202321   -1.229030   1.596475
H      1.477754   -2.748429   -.975648
H     -.129937    -1.313453   1.148837
H     -.950090    -2.991008   -1.310712
H     -3.136809   -2.206073   -1.015283
H     -3.745126   -1.231155   1.149734
H     -2.126513    -.655383   1.435069
H      3.727238   -1.194328   -1.047773
H      4.171117    -.334498   .407908
H      1.673670    .201718   -1.264327
H      3.142620    1.146959   -1.313858
H      1.342778    .845058   1.127318
H      2.812683    1.788077   1.068659
H      1.833316    3.345434   -.573717
H     -3.934602    .299088   -.827701
H     -3.774349    1.130605   .700094
H     -1.423283    .643753   -1.179333
H     -2.404607    2.089487   -1.216172
H     -.726315    1.161342   1.152060
H     -1.799330    2.539466   1.175442
H     -.467960     3.706602   -.537369
```

35

mac M2 -613.1917667 au

|   |           |           |           |
|---|-----------|-----------|-----------|
| C | -2.641526 | 1.502524  | .820158   |
| C | -1.546995 | 2.077721  | -.045785  |
| C | -.260235  | 1.855371  | .166602   |
| C | .820687   | 2.326210  | -.706147  |
| C | 2.108709  | 2.041361  | -.567714  |
| C | 2.737970  | 1.212854  | .527965   |
| C | -3.530727 | .490802   | .047695   |
| C | -2.732257 | -.631769  | -.643109  |
| C | -1.984843 | -1.570910 | .340797   |
| C | -1.103295 | -2.503162 | -.454380  |
| C | 3.304425  | -.141559  | .023703   |
| C | 2.290729  | -1.025780 | -.716559  |
| C | 1.106003  | -1.483710 | .114278   |
| C | .212148   | -2.442730 | -.583565  |
| O | .896285   | -1.066564 | 1.240801  |
| H | -3.279657 | 2.301273  | 1.188984  |
| H | -2.202258 | 1.019907  | 1.684859  |
| H | -1.865869 | 2.665804  | -.891229  |
| H | .021678   | 1.250280  | 1.004439  |
| H | .515724   | 2.939847  | -1.536535 |
| H | 2.797598  | 2.432776  | -1.297014 |
| H | 3.565306  | 1.776211  | .951780   |
| H | 2.041257  | 1.011165  | 1.321565  |
| H | -4.090509 | 1.029668  | -.711444  |
| H | -4.253893 | .061144   | .734677   |
| H | -2.005397 | -.184873  | -1.308884 |
| H | -3.408801 | -1.226020 | -1.250771 |
| H | -1.387533 | -1.010158 | 1.036589  |
| H | -2.711857 | -2.149409 | .903151   |
| H | -1.631148 | -3.231153 | -1.047571 |
| H | 4.135616  | .050465   | -.647864  |
| H | 3.695119  | -.683588  | .877779   |
| H | 1.882782  | -.488712  | -1.568552 |
| H | 2.790955  | -1.905716 | -1.111671 |
| H | .702889   | -3.098892 | -1.278296 |

35

```

mac M3 -613.1894295 au
C      -2.131622    2.177379    .497735
C      -.852711    2.391678    -.275868
C      .306065    1.883899    .113136
C      1.572412    2.034824    -.608253
C      2.714505    1.431719    -.309545
C      2.974260    .456936    .815876
C      -3.153732    1.258769    -.229682
C      -2.551588    .003309    -.878313
C      -1.748958    -.898134    .040003
C      -1.249913    -2.131007    -.623348
C      3.347945    -.950012    .279400
C      2.199100    -1.630809    -.490299
C      1.059416    -2.143316    .429438
C      -.062434    -2.678276    -.426813
O      -1.498153    -.612892    1.197417
H      -2.613365    3.133806    .680097
H      -1.896421    1.732003    1.450435
H      -.916462    2.973687    -1.180970
H      .320151    1.301117    1.012506
H      1.549169    2.694404    -1.458702
H      3.571042    1.629037    -.931643
H      3.807228    .825896    1.408984
H      2.124372    .380519    1.478009
H      -3.650335    1.825152    -1.011504
H      -3.912902    .965989    .487297
H      -1.878698    .288800    -1.682374
H      -3.343419    -.587130    -1.331910
H      -1.914270    -2.559193    -1.351272
H      4.204883    -.850733    -.380217
H      3.654462    -1.578683    1.110194
H      1.787832    -.927287    -1.203357
H      2.594090    -2.471624    -1.053304
H      .691468    -1.363264    1.072747
H      1.445336    -2.942037    1.056313
H      .186508    -3.556069    -.999391

```

36

ts M1 cbc -539.8272233 au

|   |           |           |           |
|---|-----------|-----------|-----------|
| C | .575180   | -.516288  | .996893   |
| C | 1.156946  | 1.150597  | -.348439  |
| C | -.777528  | -.464622  | 1.282119  |
| C | -1.748811 | 1.332068  | .282624   |
| C | -.790430  | 2.252999  | .634850   |
| C | .561638   | 2.198328  | .305557   |
| C | 1.222128  | -1.652633 | .214006   |
| C | 2.745897  | -1.479296 | .059944   |
| C | 2.667489  | 1.042193  | -.444727  |
| C | 3.133414  | -.349493  | -.910532  |
| C | -1.766123 | -1.569208 | .902540   |
| C | -2.151039 | -1.707787 | -.583330  |
| C | -2.007735 | .780167   | -1.111088 |
| C | -2.890987 | -.477598  | -1.119128 |
| H | 1.229703  | -.069779  | 1.720217  |
| H | .630376   | .611071   | -1.101574 |
| H | -1.037031 | .027257   | 2.197598  |
| H | -2.665679 | 1.390572  | .850072   |
| H | -1.045582 | 2.923162  | 1.438517  |
| H | 1.208861  | 2.885400  | .825297   |
| H | .780447   | -1.754229 | -.769571  |
| H | 1.032266  | -2.589000 | .737317   |
| H | 3.186028  | -1.286686 | 1.034361  |
| H | 3.168933  | -2.411178 | -.303162  |
| H | 3.033300  | 1.784693  | -1.151446 |
| H | 3.114722  | 1.270965  | .517950   |
| H | 4.212415  | -.337191  | -1.029961 |
| H | 2.706170  | -.559260  | -1.887756 |
| H | -2.680844 | -1.407440 | 1.464061  |
| H | -1.361631 | -2.521660 | 1.241081  |
| H | -1.272253 | -1.886654 | -1.189848 |
| H | -2.788794 | -2.581539 | -.684361  |
| H | -2.528725 | 1.568393  | -1.652883 |
| H | -1.102328 | .581066   | -1.658199 |
| H | -3.784669 | -.301168  | -.526203  |
| H | -3.215157 | -.670150  | -2.137421 |

36

ts M1 bbc -539.8274153 au

|   |           |           |           |
|---|-----------|-----------|-----------|
| C | .606252   | -.628202  | .905424   |
| C | 1.261816  | 1.101700  | -.290965  |
| C | -.772285  | -.628924  | 1.068557  |
| C | -1.650314 | 1.295301  | .267228   |
| C | -.688772  | 2.181019  | .695568   |
| C | .668474   | 2.116087  | .420017   |
| C | 1.318492  | -1.708914 | .089335   |
| C | 2.846584  | -1.526622 | .029804   |
| C | 2.776226  | 1.002527  | -.351991  |
| C | 3.273520  | -.356599  | -.870044  |
| C | -1.646745 | -1.670738 | .371714   |
| C | -3.079405 | -1.193412 | .074813   |
| C | -1.866061 | .715663   | -1.122150 |
| C | -3.103930 | -.208842  | -1.117177 |
| H | 1.188190  | -.257280  | 1.727372  |
| H | .752835   | .657742   | -1.117200 |
| H | -1.156358 | -.305905  | 2.016290  |
| H | -2.583956 | 1.378786  | .800440   |
| H | -.972952  | 2.831776  | 1.504937  |
| H | 1.312228  | 2.753768  | 1.002652  |
| H | .933190   | -1.748831 | -.923787  |
| H | 1.105951  | -2.676674 | .539777   |
| H | 3.232759  | -1.373540 | 1.033631  |
| H | 3.291536  | -2.442269 | -.348045  |
| H | 3.151887  | 1.784995  | -1.008594 |
| H | 3.192760  | 1.186022  | .633725   |
| H | 4.356542  | -.332117  | -.940830  |
| H | 2.890231  | -.521444  | -1.873584 |
| H | -1.690834 | -2.546481 | 1.017644  |
| H | -1.191894 | -1.995283 | -.555259  |
| H | -3.710731 | -2.046385 | -.150984  |
| H | -3.488978 | -.724252  | .962213   |
| H | -2.030996 | 1.530330  | -1.823266 |
| H | -1.012697 | .163194   | -1.477388 |
| H | -4.005911 | .393575   | -1.074257 |
| H | -3.132075 | -.767330  | -2.047304 |

35

ts M2 cbc -613.1095926 au

|   |           |           |           |
|---|-----------|-----------|-----------|
| C | -.576543  | -.664950  | -.782657  |
| C | -1.573994 | 1.062030  | .109284   |
| C | .743978   | -.368065  | -1.081275 |
| C | 1.329708  | 1.689839  | -.231447  |
| C | .283650   | 2.347408  | -.834537  |
| C | -1.071762 | 2.082334  | -.659625  |
| C | -1.072721 | -1.707637 | .220311   |
| C | -2.608742 | -1.844421 | .190033   |
| C | -3.045152 | .688901   | .061895   |
| C | -3.336638 | -.631992  | .798139   |
| C | 1.976222  | -.970795  | -.529889  |
| C | 2.127856  | -1.106393 | .966857   |
| C | 1.484691  | 1.348860  | 1.244398  |
| C | 2.550686  | .273667   | 1.521409  |
| O | 2.910827  | -1.239901 | -1.266747 |
| H | -1.242654 | -.563444  | -1.618371 |
| H | -1.085301 | .788579   | 1.015741  |
| H | .922852   | -.015303  | -2.076872 |
| H | 2.290085  | 1.830123  | -.703023  |
| H | .533533   | 2.932028  | -1.702966 |
| H | -1.741787 | 2.542878  | -1.366166 |
| H | -.768515  | -1.472973 | 1.231807  |
| H | -.633871  | -2.670019 | -.029085  |
| H | -2.935906 | -1.989659 | -.835295  |
| H | -2.890089 | -2.734321 | .744306   |
| H | -3.628981 | 1.481109  | .525553   |
| H | -3.373332 | .612414   | -.970139  |
| H | -4.406200 | -.815376  | .785016   |
| H | -3.042915 | -.528596  | 1.839450  |
| H | 1.216314  | -1.422515 | 1.444654  |
| H | 2.906471  | -1.832235 | 1.159561  |
| H | 1.799786  | 2.271154  | 1.729415  |
| H | .558239   | 1.059255  | 1.707609  |
| H | 3.492478  | .559308   | 1.064979  |
| H | 2.713184  | .197559   | 2.590656  |



35

ts M2 bbc -613.1128631 au

|   |           |           |           |
|---|-----------|-----------|-----------|
| C | -.712980  | -.508759  | -1.015748 |
| C | -1.317203 | .942954   | .336153   |
| C | .687643   | -.495737  | -.996988  |
| C | 1.546675  | 1.705661  | -.336420  |
| C | .407847   | 2.358158  | -.732079  |
| C | -.892554  | 2.070650  | -.349945  |
| C | -1.484553 | -1.722970 | -.472118  |
| C | -2.995715 | -1.518950 | -.309710  |
| C | -2.815066 | .829637   | .604534   |
| C | -3.307824 | -.597030  | .873724   |
| C | 1.455501  | -1.100667 | .070024   |
| C | 2.946127  | -.842475  | .028540   |
| C | 1.983201  | 1.298273  | 1.057206  |
| C | 3.196363  | .336410   | 1.019070  |
| O | .970510   | -1.619516 | 1.075692  |
| H | -1.159899 | -.104985  | -1.908111 |
| H | -.697944  | .476633   | 1.076256  |
| H | 1.225844  | -.196194  | -1.869255 |
| H | 2.397168  | 1.856948  | -.984104  |
| H | .507486   | 3.009167  | -1.584456 |
| H | -1.662436 | 2.650868  | -.829642  |
| H | -1.043169 | -2.036874 | .456610   |
| H | -1.316448 | -2.516996 | -1.196817 |
| H | -3.425054 | -1.107499 | -1.219864 |
| H | -3.455832 | -2.488501 | -.146272  |
| H | -3.050276 | 1.454999  | 1.463132  |
| H | -3.359676 | 1.233452  | -.243725  |
| H | -4.377404 | -.569216  | 1.056443  |
| H | -2.833740 | -.990489  | 1.767790  |
| H | 3.483431  | -1.721086 | .358889   |
| H | 3.271008  | -.579497  | -.967930  |
| H | 2.282766  | 2.209481  | 1.570985  |
| H | 1.191497  | .853257   | 1.634012  |
| H | 4.089396  | .876510   | .726261   |
| H | 3.354047  | -.062194  | 2.012173  |

35

ts M3 cbc -613.1191519 au

|   |           |           |           |
|---|-----------|-----------|-----------|
| C | .516354   | -.315728  | 1.053305  |
| C | 1.078810  | 1.393323  | -.430449  |
| C | -.853494  | -.338926  | 1.296149  |
| C | -1.818425 | 1.320159  | .300942   |
| C | -.919107  | 2.319012  | .626183   |
| C | .419910   | 2.378362  | .257519   |
| C | 1.268480  | -1.249766 | .226691   |
| C | 2.774978  | -1.051464 | .256334   |
| C | 2.589934  | 1.379327  | -.543970  |
| C | 3.159752  | -.022163  | -.836022  |
| C | -1.798063 | -1.496922 | .932791   |
| C | -2.210910 | -1.681574 | -.537683  |
| C | -2.069107 | .776028   | -1.101407 |
| C | -2.961243 | -.472833  | -1.100509 |
| O | .782040   | -2.101164 | -.507699  |
| H | 1.118492  | .225319   | 1.751586  |
| H | .571747   | .794735   | -1.151743 |
| H | -1.124001 | .104380   | 2.235417  |
| H | -2.734988 | 1.345101  | .870888   |
| H | -1.208023 | 2.978089  | 1.427151  |
| H | 1.024077  | 3.113626  | .761169   |
| H | 3.111173  | -.703681  | 1.224292  |
| H | 3.243257  | -2.001019 | .032814   |
| H | 2.883138  | 2.045246  | -1.353674 |
| H | 3.029929  | 1.768502  | .368178   |
| H | 4.239604  | .039288   | -.910398  |
| H | 2.784628  | -.381332  | -1.788539 |
| H | -2.697401 | -1.373757 | 1.527725  |
| H | -1.317852 | -2.413763 | 1.258909  |
| H | -1.325277 | -1.880417 | -1.117619 |
| H | -2.848268 | -2.559790 | -.591217  |
| H | -2.569005 | 1.572187  | -1.649252 |
| H | -1.161474 | .551228   | -1.634063 |
| H | -3.861309 | -.281979  | -.521464  |
| H | -3.272265 | -.683165  | -2.119087 |

35

ts M3 bbc -613.1210002 au

|   |           |           |           |
|---|-----------|-----------|-----------|
| C | .478747   | -.299850  | 1.104325  |
| C | 1.083971  | 1.435600  | -.373153  |
| C | -.888369  | -.281799  | 1.396440  |
| C | -1.763350 | 1.365939  | .430363   |
| C | -.864915  | 2.384123  | .711934   |
| C | .469827   | 2.426233  | .347887   |
| C | 1.134770  | -1.140715 | .117484   |
| C | 2.653601  | -1.094170 | .143047   |
| C | 2.591337  | 1.372716  | -.523420  |
| C | 3.100536  | -.034120  | -.894500  |
| C | -1.808796 | -1.437283 | .956202   |
| C | -3.237864 | -1.027254 | .561834   |
| C | -1.981497 | .638950   | -.896606  |
| C | -3.242317 | -.245573  | -.773696  |
| O | .570090   | -1.761536 | -.782666  |
| H | 1.139912  | .152259   | 1.812560  |
| H | .531040   | .889438   | -1.103995 |
| H | -1.132589 | .097210   | 2.372491  |
| H | -2.688201 | 1.468557  | .973017   |
| H | -1.170276 | 3.086077  | 1.468496  |
| H | 1.093377  | 3.150978  | .842542   |
| H | 3.032372  | -.840718  | 1.123614  |
| H | 3.030986  | -2.065085 | -.150813  |
| H | 2.889207  | 2.066414  | -1.307585 |
| H | 3.063978  | 1.702158  | .395879   |
| H | 4.181861  | -.020406  | -.967507  |
| H | 2.703449  | -.326242  | -1.860152 |
| H | -1.861528 | -2.114302 | 1.805822  |
| H | -1.344269 | -1.965881 | .142682   |
| H | -3.846694 | -1.919226 | .461144   |
| H | -3.681916 | -.433723  | 1.353420  |
| H | -2.116538 | 1.368078  | -1.690349 |
| H | -1.151700 | .005572   | -1.163140 |
| H | -4.134175 | .369712   | -.837737  |
| H | -3.263464 | -.943931  | -1.602661 |
